# Supplementary material for: Interactions of semiconductor Cd-based quantum dots and Cd2+ with gut bacteria isolated from wild Salmo trutta fry
Source: PeerJ. 2022 Sep 15;10:e14025. doi: 10.7717/peerj.14025 (PMC9482770; doi:10.7717/peerj.14025)
Supplement: Supplemental Information 5 [file peerj-10-14025-s005.xlsx]

## Sheet: Fig.1A
	Wavelength	Norm. PL int	Norm. PL int
	nm
		Cd QDs pH5 1val	Cd QDs pH7 1val
	173.85	0.03599	0.04593
	174.45	0.07598	0.13884
	175.05	0.06122	0.13473
	175.65	0.06239	0.1307
	176.26	0.0665	0.12475
	176.86	0.06092	0.12269
	177.46	0.06159	0.12163
	178.06	0.0592	0.12015
	178.66	0.06167	0.11954
	179.26	0.06196	0.11848
	179.87	0.05783	0.11636
	180.47	0.05451	0.11652
	181.07	0.05666	0.11903
	181.67	0.05801	0.12605
	182.27	0.05672	0.13682
	182.87	0.05949	0.14659
	183.48	0.05815	0.1537
	184.08	0.061	0.16118
	184.68	0.06462	0.17166
	185.28	0.06354	0.18261
	185.88	0.06777	0.19469
	186.48	0.07453	0.20749
	187.08	0.08183	0.22057
	187.69	0.08995	0.23393
	188.29	0.1033	0.24769
	188.89	0.12042	0.26183
	189.49	0.13726	0.27583
	190.09	0.15013	0.29096
	190.69	0.15959	0.30682
	191.29	0.17401	0.32312
	191.89	0.18478	0.33972
	192.5	0.19143	0.35607
	193.1	0.19847	0.37364
	193.7	0.20591	0.39221
	194.3	0.21666	0.41072
	194.9	0.23016	0.4296
	195.5	0.24268	0.44849
	196.1	0.25206	0.46707
	196.7	0.2595	0.48591
	197.3	0.26986	0.50373
	197.9	0.28199	0.52041
	198.5	0.29157	0.53649
	199.1	0.29763	0.55099
	199.71	0.30389	0.56538
	200.31	0.31778	0.57918
	200.91	0.32951	0.59111
	201.51	0.33343	0.60288
	202.11	0.33988	0.6145
	202.71	0.34692	0.62659
	203.31	0.35846	0.63893
	203.91	0.36824	0.65095
	204.51	0.37626	0.66431
	205.11	0.38877	0.67894
	205.71	0.40247	0.69355
	206.31	0.42105	0.70824
	206.91	0.43454	0.72316
	207.51	0.44862	0.73821
	208.11	0.46818	0.75246
	208.71	0.48696	0.76577
	209.31	0.50299	0.77898
	209.91	0.51923	0.79208
	210.51	0.53429	0.80427
	211.11	0.55404	0.81505
	211.71	0.58142	0.82628
	212.31	0.60274	0.83764
	212.91	0.62093	0.84881
	213.51	0.64362	0.85995
	214.11	0.66728	0.87088
	214.71	0.69271	0.8831
	215.31	0.71403	0.89607
	215.91	0.72811	0.90934
	216.51	0.74004	0.92337
	217.11	0.75158	0.93776
	217.71	0.76468	0.9522
	218.31	0.77133	0.96712
	218.91	0.7684	0.98199
	219.51	0.7682	0.99638
	220.11	0.77016	1.00982
	220.71	0.77583	1.02231
	221.31	0.78561	1.03432
	221.91	0.79441	1.04514
	222.51	0.81279	1.05481
	223.11	0.84409	1.06348
	223.71	0.87421	1.07165
	224.31	0.90628	1.07942
	224.91	0.94031	1.08635
	225.51	0.97513	1.09344
	226.1	1.01229	1.10049
	226.7	1.03791	1.10739
	227.3	1.06314	1.11428
	227.9	1.08289	1.1211
	228.5	1.09639	1.12824
	229.1	1.10851	1.13511
	229.7	1.11575	1.14164
	230.3	1.12435	1.14762
	230.9	1.12885	1.15323
	231.5	1.13374	1.15799
	232.1	1.14254	1.16162
	232.69	1.14822	1.16427
	233.29	1.15037	1.16575
	233.89	1.15252	1.16645
	234.49	1.15506	1.16578
	235.09	1.15741	1.16432
	235.69	1.15506	1.16237
	236.29	1.15154	1.1594
	236.89	1.14939	1.15613
	237.49	1.14743	1.15246
	238.08	1.14704	1.14843
	238.68	1.14215	1.14443
	239.28	1.13844	1.13981
	239.88	1.13707	1.13489
	240.48	1.13237	1.12973
	241.08	1.13022	1.1238
	241.68	1.12572	1.11735
	242.27	1.12044	1.11049
	242.87	1.11614	1.10328
	243.47	1.10969	1.09564
	244.07	1.10206	1.08748
	244.67	1.0956	1.07914
	245.27	1.08915	1.07037
	245.86	1.07996	1.06132
	246.46	1.07194	1.05187
	247.06	1.06196	1.04179
	247.66	1.05062	1.03144
	248.26	1.04104	1.02069
	248.86	1.02793	1.00958
	249.45	1.01366	0.99815
	250.05	1.00114	0.98623
	250.65	0.98764	0.97374
	251.25	0.97473	0.96104
	251.85	0.96065	0.94818
	252.44	0.94559	0.9348
	253.04	0.93249	0.92099
	253.64	0.9186	0.9068
	254.24	0.90433	0.89235
	254.83	0.89083	0.87771
	255.43	0.87675	0.86267
	256.03	0.86423	0.84735
	256.63	0.8523	0.83207
	257.23	0.83939	0.81683
	257.82	0.8257	0.80154
	258.42	0.81142	0.78638
	259.02	0.79793	0.77136
	259.62	0.78424	0.75637
	260.21	0.76957	0.7414
	260.81	0.75608	0.7266
	261.41	0.74258	0.71194
	262.01	0.72948	0.6974
	262.6	0.71715	0.68305
	263.2	0.70346	0.66875
	263.8	0.69134	0.65481
	264.39	0.67941	0.64116
	264.99	0.66689	0.62764
	265.59	0.65476	0.61426
	266.19	0.64166	0.6013
	266.78	0.63071	0.58873
	267.38	0.61897	0.57649
	267.98	0.60763	0.56475
	268.57	0.59726	0.55325
	269.17	0.58631	0.54214
	269.77	0.57634	0.53138
	270.37	0.56734	0.52099
	270.96	0.55893	0.5111
	271.56	0.55052	0.50155
	272.16	0.54328	0.49232
	272.75	0.53722	0.48344
	273.35	0.52979	0.47499
	273.95	0.52216	0.46671
	274.54	0.51571	0.45866
	275.14	0.50847	0.45087
	275.74	0.50162	0.44331
	276.33	0.49537	0.43618
	276.93	0.48852	0.4294
	277.53	0.48304	0.42284
	278.12	0.47737	0.41658
	278.72	0.47131	0.41055
	279.32	0.46622	0.40467
	279.91	0.46134	0.3989
	280.51	0.45703	0.39328
	281.1	0.45195	0.38781
	281.7	0.44667	0.38257
	282.3	0.44217	0.37762
	282.89	0.43806	0.37287
	283.49	0.43376	0.36829
	284.09	0.42906	0.36394
	284.68	0.42535	0.35973
	285.28	0.42261	0.35561
	285.87	0.41909	0.35163
	286.47	0.41518	0.34765
	287.07	0.41107	0.34386
	287.66	0.40755	0.34016
	288.26	0.40403	0.33641
	288.85	0.39934	0.33264
	289.45	0.39601	0.32893
	290.05	0.39269	0.32527
	290.64	0.38975	0.32157
	291.24	0.38662	0.31792
	291.83	0.3833	0.31427
	292.43	0.38076	0.31087
	293.03	0.37763	0.30759
	293.62	0.37469	0.30423
	294.22	0.37156	0.30093
	294.81	0.36843	0.29773
	295.41	0.3657	0.29463
	296	0.36394	0.29166
	296.6	0.3612	0.28871
	297.19	0.35866	0.28582
	297.79	0.35631	0.28308
	298.38	0.35357	0.28039
	298.98	0.35083	0.27773
	299.58	0.34731	0.27511
	300.17	0.3436	0.27244
	300.77	0.34027	0.26978
	301.36	0.33773	0.26717
	301.96	0.3346	0.26459
	302.55	0.33206	0.26204
	303.15	0.33088	0.25952
	303.74	0.32951	0.25708
	304.34	0.32775	0.25472
	304.93	0.32521	0.25245
	305.53	0.32267	0.25025
	306.12	0.32013	0.2482
	306.72	0.31778	0.24628
	307.31	0.31485	0.24442
	307.91	0.31191	0.24259
	308.5	0.30996	0.24084
	309.1	0.3078	0.23917
	309.69	0.30565	0.23747
	310.29	0.30331	0.23574
	310.88	0.30096	0.23405
	311.48	0.29959	0.23239
	312.07	0.29881	0.23073
	312.66	0.29744	0.22901
	313.26	0.29607	0.22722
	313.85	0.29509	0.22549
	314.45	0.29353	0.22383
	315.04	0.29157	0.22214
	315.64	0.28922	0.22049
	316.23	0.28649	0.21888
	316.83	0.28355	0.21728
	317.42	0.28101	0.21579
	318.01	0.27847	0.21426
	318.61	0.27651	0.21272
	319.2	0.27475	0.21108
	319.8	0.2728	0.20945
	320.39	0.27123	0.20796
	320.99	0.27006	0.20645
	321.58	0.2681	0.20502
	322.17	0.26615	0.2035
	322.77	0.26497	0.2021
	323.36	0.26341	0.2009
	323.96	0.26223	0.19961
	324.55	0.25969	0.19832
	325.14	0.25715	0.19689
	325.74	0.25637	0.1956
	326.33	0.25441	0.19438
	326.92	0.25226	0.19295
	327.52	0.25011	0.19163
	328.11	0.24757	0.19028
	328.71	0.2462	0.18901
	329.3	0.24424	0.18792
	329.89	0.24268	0.1868
	330.49	0.24052	0.18568
	331.08	0.23837	0.18462
	331.67	0.23759	0.1835
	332.27	0.23544	0.1824
	332.86	0.23446	0.18122
	333.45	0.23251	0.17996
	334.05	0.23016	0.17867
	334.64	0.22938	0.17746
	335.23	0.22722	0.17638
	335.83	0.22546	0.17524
	336.42	0.22429	0.17435
	337.01	0.22331	0.17351
	337.61	0.22194	0.17257
	338.2	0.22038	0.17182
	338.79	0.21862	0.17105
	339.39	0.21764	0.17033
	339.98	0.21686	0.16967
	340.57	0.21471	0.1688
	341.16	0.21373	0.16799
	341.76	0.21217	0.16729
	342.35	0.21099	0.16673
	342.94	0.2104	0.16607
	343.54	0.20767	0.16527
	344.13	0.20649	0.16457
	344.72	0.20512	0.16386
	345.31	0.20278	0.16319
	345.91	0.2016	0.16231
	346.5	0.20023	0.16118
	347.09	0.19867	0.16012
	347.68	0.19808	0.1592
	348.28	0.19789	0.15818
	348.87	0.19691	0.15717
	349.46	0.19593	0.15624
	350.05	0.19535	0.15547
	350.65	0.19378	0.15478
	351.24	0.193	0.15402
	351.83	0.19202	0.1533
	352.42	0.19065	0.15265
	353.02	0.19046	0.15209
	353.61	0.19006	0.15144
	354.2	0.18948	0.15076
	354.79	0.1887	0.1502
	355.39	0.1885	0.14949
	355.98	0.18811	0.14865
	356.57	0.18694	0.14779
	357.16	0.18576	0.14685
	357.75	0.18439	0.14598
	358.35	0.18459	0.14504
	358.94	0.18439	0.14408
	359.53	0.18267	0.14319
	360.12	0.18171	0.14227
	360.71	0.18025	0.14142
	361.3	0.17931	0.14063
	361.9	0.17907	0.1398
	362.49	0.17731	0.13895
	363.08	0.17626	0.13821
	363.67	0.1753	0.13757
	364.26	0.17514	0.13694
	364.85	0.17465	0.13637
	365.45	0.17407	0.13594
	366.04	0.17326	0.13562
	366.63	0.17236	0.13531
	367.22	0.17186	0.13503
	367.81	0.17209	0.13487
	368.4	0.17141	0.13483
	368.99	0.16996	0.13465
	369.59	0.1699	0.13426
	370.18	0.16794	0.13392
	370.77	0.1674	0.13357
	371.36	0.16744	0.13329
	371.95	0.16599	0.13292
	372.54	0.1662	0.1325
	373.13	0.16648	0.13226
	373.72	0.16685	0.13197
	374.31	0.16775	0.13174
	374.91	0.16716	0.13144
	375.5	0.16667	0.13116
	376.09	0.1662	0.13103
	376.68	0.16605	0.13101
	377.27	0.16532	0.1311
	377.86	0.16409	0.13127
	378.45	0.16372	0.13143
	379.04	0.16274	0.13157
	379.63	0.16221	0.13179
	380.22	0.16196	0.13192
	380.81	0.16153	0.13197
	381.4	0.16075	0.13204
	381.99	0.16098	0.132
	382.58	0.16102	0.13202
	383.18	0.16071	0.13217
	383.77	0.16041	0.13225
	384.36	0.1594	0.13232
	384.95	0.15981	0.13229
	385.54	0.15908	0.13213
	386.13	0.15797	0.13202
	386.72	0.15768	0.13193
	387.31	0.15684	0.13178
	387.9	0.15707	0.13157
	388.49	0.15646	0.1312
	389.08	0.15519	0.13089
	389.67	0.15511	0.13069
	390.26	0.15416	0.13038
	390.85	0.15392	0.12998
	391.44	0.15314	0.1294
	392.03	0.15202	0.12895
	392.62	0.15161	0.12856
	393.21	0.15026	0.12807
	393.8	0.15015	0.12759
	394.39	0.14925	0.12698
	394.98	0.14843	0.12645
	395.57	0.14841	0.12597
	396.16	0.14698	0.1255
	396.75	0.1459	0.12508
	397.34	0.14473	0.1246
	397.93	0.14391	0.12416
	398.51	0.14348	0.12373
	399.1	0.14289	0.12331
	399.69	0.14228	0.12282
	400.28	0.14164	0.12213
	400.87	0.14183	0.12139
	401.46	0.14193	0.12058
	402.05	0.14117	0.11975
	402.64	0.14015	0.11909
	403.23	0.13935	0.11849
	403.82	0.13892	0.11794
	404.41	0.13843	0.11735
	405	0.13749	0.1167
	405.59	0.13681	0.11612
	406.18	0.13712	0.11556
	406.76	0.13677	0.1149
	407.35	0.1364	0.11413
	407.94	0.13595	0.11344
	408.53	0.13497	0.11287
	409.12	0.13491	0.11227
	409.71	0.13421	0.11163
	410.3	0.13311	0.11081
	410.89	0.13235	0.10998
	411.48	0.13086	0.10918
	412.06	0.13041	0.1081
	412.65	0.13008	0.10703
	413.24	0.12902	0.10603
	413.83	0.12812	0.10506
	414.42	0.12758	0.10423
	415.01	0.12736	0.10337
	415.6	0.12719	0.10263
	416.18	0.12658	0.10204
	416.77	0.12584	0.10138
	417.36	0.12599	0.10081
	417.95	0.12646	0.10026
	418.54	0.12654	0.09979
	419.13	0.12587	0.09938
	419.71	0.12482	0.09883
	420.3	0.1241	0.09825
	420.89	0.12359	0.09771
	421.48	0.12263	0.09727
	422.07	0.12165	0.09698
	422.65	0.12106	0.09667
	423.24	0.12012	0.09631
	423.83	0.11979	0.09598
	424.42	0.12003	0.09576
	425.01	0.11971	0.09548
	425.59	0.1195	0.09518
	426.18	0.11895	0.09476
	426.77	0.11846	0.0943
	427.36	0.1187	0.09391
	427.94	0.11823	0.09343
	428.53	0.11721	0.09308
	429.12	0.11623	0.09282
	429.71	0.1157	0.09246
	430.3	0.11563	0.09213
	430.88	0.115	0.09179
	431.47	0.11385	0.09151
	432.06	0.11248	0.09125
	432.65	0.11097	0.0908
	433.23	0.11005	0.09029
	433.82	0.10829	0.08979
	434.41	0.10595	0.08918
	434.99	0.10391	0.08859
	435.58	0.10268	0.08789
	436.17	0.10246	0.08724
	436.76	0.10174	0.08673
	437.34	0.10057	0.08616
	437.93	0.09908	0.08558
	438.52	0.09853	0.08492
	439.1	0.09826	0.08423
	439.69	0.098	0.0835
	440.28	0.09734	0.08273
	440.86	0.09662	0.08186
	441.45	0.09673	0.08096
	442.04	0.09652	0.08012
	442.63	0.09611	0.07932
	443.21	0.09523	0.07867
	443.8	0.09433	0.07814
	444.39	0.09405	0.07769
	444.97	0.0939	0.07727
	445.56	0.09337	0.07679
	446.15	0.09337	0.07639
	446.73	0.09308	0.076
	447.32	0.09282	0.07558
	447.9	0.09235	0.07515
	448.49	0.0911	0.07462
	449.08	0.09089	0.07421
	449.66	0.09044	0.07388
	450.25	0.08914	0.07349
	450.84	0.08883	0.07316
	451.42	0.08854	0.07278
	452.01	0.08801	0.07231
	452.59	0.08869	0.07193
	453.18	0.08811	0.07149
	453.77	0.08791	0.07098
	454.35	0.0883	0.07044
	454.94	0.08731	0.06977
	455.53	0.08715	0.06918
	456.11	0.08672	0.06868
	456.7	0.08541	0.06814
	457.28	0.08431	0.06763
	457.87	0.08345	0.06728
	458.45	0.08242	0.06708
	459.04	0.08173	0.06697
	459.63	0.08105	0.06679
	460.21	0.0804	0.06649
	460.8	0.08009	0.06613
	461.38	0.0796	0.06571
	461.97	0.07925	0.06512
	462.55	0.07899	0.06442
	463.14	0.07897	0.0636
	463.72	0.07804	0.06288
	464.31	0.07704	0.06211
	464.9	0.07645	0.06118
	465.48	0.07588	0.06032
	466.07	0.07592	0.0594
	466.65	0.07469	0.05847
	467.24	0.07342	0.0576
	467.82	0.07276	0.05663
	468.41	0.07248	0.05582
	468.99	0.07227	0.0552
	469.58	0.07105	0.05452
	470.16	0.06984	0.0538
	470.75	0.06865	0.05303
	471.33	0.06843	0.05224
	471.92	0.06757	0.05153
	472.5	0.06665	0.05074
	473.09	0.06534	0.04979
	473.67	0.0638	0.04888
	474.26	0.06333	0.04807
	474.84	0.06268	0.0472
	475.43	0.06204	0.04618
	476.01	0.06077	0.04513
	476.59	0.06004	0.04411
	477.18	0.05928	0.04318
	477.76	0.05883	0.04224
	478.35	0.05842	0.04123
	478.93	0.05713	0.04042
	479.52	0.05644	0.03983
	480.1	0.05543	0.03927
	480.69	0.05404	0.03862
	481.27	0.0531	0.03791
	481.85	0.05216	0.03733
	482.44	0.05112	0.03668
	483.02	0.04993	0.03594
	483.61	0.04776	0.03511
	484.19	0.046	0.03409
	484.77	0.0449	0.0332
	485.36	0.04357	0.03215
	485.94	0.04197	0.03096
	486.53	0.04023	0.02994
	487.11	0.03972	0.02886
	487.69	0.03945	0.02786
	488.28	0.03876	0.02707
	488.86	0.03822	0.02639
	489.45	0.03716	0.02588
	490.03	0.03694	0.02551
	490.61	0.03651	0.02508
	491.2	0.03583	0.02471
	491.78	0.03511	0.02444
	492.36	0.03378	0.02422
	492.95	0.03297	0.02393
	493.53	0.03231	0.02357
	494.11	0.03207	0.0232
	494.7	0.03092	0.02284
	495.28	0.03002	0.02241
	495.86	0.02983	0.0218
	496.45	0.02959	0.02102
	497.03	0.02957	0.02026
	497.61	0.02893	0.01956
	498.2	0.0284	0.01883
	498.78	0.02805	0.01816
	499.36	0.0272	0.01759
	499.95	0.02699	0.01707
	500.53	0.02617	0.01661
	501.11	0.02542	0.01626
	501.7	0.02509	0.01597
	502.28	0.02433	0.01585
	502.86	0.02439	0.01578
	503.44	0.02417	0.01561
	504.03	0.02415	0.01544
	504.61	0.02408	0.01537
	505.19	0.02466	0.0153
	505.77	0.02517	0.01518
	506.36	0.02501	0.01496
	506.94	0.02519	0.01465
	507.52	0.02494	0.01454
	508.11	0.02497	0.01443
	508.69	0.02486	0.01416
	509.27	0.02378	0.01385
	509.85	0.02249	0.0136
	510.43	0.02222	0.0133
	511.02	0.02149	0.01306
	511.6	0.0204	0.01277
	512.18	0.02026	0.0126
	512.76	0.01999	0.0126
	513.35	0.02001	0.01248
	513.93	0.02083	0.01247
	514.51	0.02087	0.01254
	515.09	0.02098	0.01274
	515.67	0.0212	0.01287
	516.26	0.02061	0.01291
	516.84	0.02083	0.01303
	517.42	0.02018	0.01314
	518	0.01952	0.01333
	518.58	0.01975	0.01335
	519.17	0.01909	0.0132
	519.75	0.01858	0.01315
	520.33	0.01774	0.01312
	520.91	0.01696	0.01323
	521.49	0.01701	0.0132
	522.07	0.01719	0.01295
	522.66	0.0178	0.01275
	523.24	0.01879	0.01257
	523.82	0.02032	0.01241
	524.4	0.02132	0.01207
	524.98	0.02126	0.0115
	525.56	0.0211	0.0111
	526.14	0.02052	0.01075
	526.72	0.01971	0.01027
	527.31	0.01917	0.00991
	527.89	0.01809	0.00938
	528.47	0.01743	0.00888
	529.05	0.01811	0.00845
	529.63	0.01782	0.00802
	530.21	0.01674	0.00786
	530.79	0.01647	0.00774
	531.37	0.01676	0.0076
	531.95	0.01692	0.00736
	532.53	0.01741	0.00723
	533.12	0.01827	0.00715
	533.7	0.0184	0.00699
	534.28	0.01905	0.00678
	534.86	0.01964	0.00643
	535.44	0.01983	0.00624
	536.02	0.01964	0.00612
	536.6	0.01872	0.00599
	537.18	0.01836	0.00579
	537.76	0.01772	0.00549
	538.34	0.01764	0.00526
	538.92	0.01729	0.00515
	539.5	0.01621	0.0051
	540.08	0.01668	0.00501
	540.66	0.01602	0.00493
	541.24	0.01543	0.00491
	541.82	0.0161	0.005
	542.4	0.01578	0.00501
	542.98	0.01592	0.00488
	543.56	0.01588	0.00488
	544.14	0.01559	0.00485
	544.72	0.01523	0.00494
	545.3	0.01559	0.00509
	545.88	0.0161	0.00525
	546.46	0.01527	0.0055
	547.04	0.0148	0.00568
	547.62	0.01406	0.00574
	548.2	0.01357	0.00577
	548.78	0.01344	0.00584
	549.36	0.0123	0.00589
	549.94	0.01152	0.00588
	550.52	0.01187	0.00583
	551.1	0.01267	0.00593
	551.68	0.01277	0.00613
	552.26	0.01238	0.0063
	552.84	0.0132	0.00641
	553.42	0.01344	0.00647
	554	0.01357	0.00653
	554.58	0.01424	0.00662
	555.16	0.0148	0.00676
	555.74	0.01576	0.00682
	556.32	0.01643	0.00681
	556.89	0.01637	0.00668
	557.47	0.01664	0.00644
	558.05	0.01686	0.00632
	558.63	0.01568	0.00618
	559.21	0.0148	0.006
	559.79	0.01516	0.00589
	560.37	0.01545	0.00576
	560.95	0.01498	0.00573
	561.53	0.01463	0.00567
	562.11	0.01326	0.00553
	562.68	0.01291	0.00526
	563.26	0.01242	0.00491
	563.84	0.01107	0.00449
	564.42	0.01113	0.00411
	565	0.01062	0.00382
	565.58	0.01087	0.00355
	566.16	0.01091	0.00323
	566.73	0.01048	0.00292
	567.31	0.01017	0.00266
	567.89	0.00917	0.00242
	568.47	0.00923	0.0022
	569.05	0.00964	0.00186
	569.63	0.01003	0.00162
	570.2	0.01035	0.00145
	570.78	0.01078	0.00131
	571.36	0.01152	0.00125
	571.94	0.0114	0.00114
	572.52	0.01058	0.00111
	573.09	0.01017	0.00115
	573.67	0.00995	0.00127
	574.25	0.00999	0.00139
	574.83	0.01011	0.00142
	575.41	0.01027	0.00143
	575.98	0.01109	0.0014
	576.56	0.01099	0.00142
	577.14	0.01062	0.00142
	577.72	0.01035	0.00142
	578.3	0.01023	0.00143
	578.87	0.00995	0.0015
	579.45	0.00978	0.00167
	580.03	0.00968	0.00181
	580.61	0.00952	0.00209
	581.18	0.00945	0.00232
	581.76	0.00849	0.00248
	582.34	0.00814	0.00275
	582.92	0.00752	0.00298
	583.49	0.00666	0.00333
	584.07	0.00651	0.00372
	584.65	0.00639	0.00394
	585.22	0.00683	0.00408
	585.8	0.00684	0.0042
	586.38	0.00697	0.0043
	586.96	0.00713	0.00438
	587.53	0.00719	0.00439
	588.11	0.00723	0.00429
	588.69	0.0069	0.00424
	589.26	0.00713	0.00432
	589.84	0.00723	0.00437
	590.42	0.00712	0.00444
	590.99	0.0073	0.0046
	591.57	0.00704	0.00481
	592.15	0.00637	0.00498
	592.72	0.00631	0.0051
	593.3	0.00619	0.00511
	593.88	0.00688	0.00503
	594.45	0.00796	0.00496
	595.03	0.00866	0.00489
	595.61	0.00937	0.00487
	596.18	0.00974	0.00496
	596.76	0.01052	0.00516
	597.34	0.01011	0.00541
	597.91	0.00888	0.00574
	598.49	0.00735	0.00602
	599.06	0.00603	0.00613
	599.64	0.00593	0.00624
	600.22	0.00505	0.00628
	600.79	0.00446	0.00618
	601.37	0.00504	0.00611
	601.94	0.00508	0.006
	602.52	0.00607	0.00593
	603.1	0.00727	0.0059
	603.67	0.0077	0.00579
	604.25	0.00783	0.00575
	604.82	0.00711	0.00579
	605.4	0.00702	0.00583
	605.97	0.0069	0.00585
	606.55	0.00654	0.00577
	607.13	0.00636	0.00569
	607.7	0.00613	0.00563
	608.28	0.00702	0.00558
	608.85	0.00751	0.00562
	609.43	0.00797	0.00578
	610	0.00925	0.00604
	610.58	0.00945	0.00635
	611.15	0.00855	0.00667
	611.73	0.00774	0.00686
	612.3	0.00693	0.00702
	612.88	0.00669	0.00709
	613.45	0.00637	0.00696
	614.03	0.00502	0.00677
	614.6	0.00495	0.00649
	615.18	0.00531	0.00611
	615.75	0.00658	0.00574
	616.33	0.00811	0.00548
	616.9	0.00808	0.0053
	617.48	0.00868	0.00529
	618.05	0.00933	0.00538
	618.63	0.01036	0.00559
	619.2	0.01087	0.00597
	619.78	0.01031	0.00636
	620.35	0.00976	0.00672
	620.93	0.00976	0.00691
	621.5	0.01025	0.00691
	622.08	0.00896	0.0069
	622.65	0.00802	0.00672
	623.23	0.00777	0.0065
	623.8	0.00744	0.0062
	624.37	0.00811	0.00568
	624.95	0.00742	0.0052
	625.52	0.00709	0.00482
	626.1	0.00733	0.00449
	626.67	0.00755	0.0043
	627.25	0.00828	0.00429
	627.82	0.00738	0.00437
	628.39	0.00652	0.00467
	628.97	0.00606	0.00505
	629.54	0.00564	0.00532
	630.12	0.0059	0.00558
	630.69	0.0052	0.00575
	631.26	0.00485	0.00576
	631.84	0.00559	0.00577
	632.41	0.00566	0.00585
	632.98	0.00542	0.00589
	633.56	0.00535	0.00585
	634.13	0.00575	0.00583
	634.71	0.00574	0.00591
	635.28	0.00565	0.00607
	635.85	0.00544	0.00615
	636.43	0.00593	0.00611
	637	0.00684	0.00602
	637.57	0.00754	0.00607
	638.15	0.0078	0.00616
	638.72	0.00706	0.00606
	639.29	0.00773	0.00605
	639.87	0.00829	0.00611
	640.44	0.00874	0.00637
	641.01	0.00907	0.00679
	641.58	0.00874	0.00711
	642.16	0.00862	0.00732
	642.73	0.00819	0.00745
	643.3	0.00637	0.00752
	643.88	0.0049	0.00721
	644.45	0.0046	0.00665
	645.02	0.00291	0.006
	645.59	0.00171	0.00536
	646.17	0.00145	0.00503
	646.74	0.00229	0.00475
	647.31	0.00293	0.0045
	647.89	0.00262	0.00451
	648.46	0.00308	0.00463
	649.03	0.00361	0.00468
	649.6	0.00472	0.00459
	650.18	0.00564	0.00435
	650.75	0.00566	0.004
	651.32	0.00625	0.00352
	651.89	0.00648	0.00301
	652.46	0.0062	0.00259
	653.04	0.00629	0.00235
	653.61	0.00593	0.00223
	654.18	0.00551	0.00204
	654.75	0.00212	0.002
	655.33	0.00146	0.00208
	655.9	0.00239	0.00213
	656.47	0.00103	0.0021
	657.04	0.00193	0.00197
	657.61	0.000370603	0.00188
	658.18	0.000806748	0.00184
	658.76	0.00451	0.00177
	659.33	0.00412	0.00168
	659.9	0.00397	0.00162
	660.47	0.00509	0.00179
	661.04	0.00582	0.00199
	661.61	0.00767	0.00219
	662.19	0.00907	0.00235
	662.76	0.00937	0.00224
	663.33	0.01089	0.00211
	663.9	0.01179	0.00197
	664.47	0.01156	0.00167
	665.04	0.01087	0.00135
	665.61	0.00892	0.00107
	666.19	0.00769	0.000957377
	666.76	0.00729	0.00111
	667.33	0.0065	0.00139
	667.9	0.00673	0.00174
	668.47	0.00735	0.00212
	669.04	0.00793	0.00245
	669.61	0.00833	0.00252
	670.18	0.00793	0.00248
	670.75	0.00669	0.00254
	671.32	0.00677	0.00245
	671.9	0.00777	0.00225
	672.47	0.00771	0.00209
	673.04	0.00809	0.00209
	673.61	0.00786	0.00219
	674.18	0.00862	0.00233
	674.75	0.00911	0.00243
	675.32	0.00668	0.00252
	675.89	0.00474	0.00264
	676.46	0.00272	0.00261
	677.03	0.00117	0.00262
	677.6	0.000411675	0.00265
	678.17	-0.00149	0.00261
	678.74	-0.00142	0.00258
	679.31	-0.00113	0.00261
	679.88	-0.00201	0.0028
	680.45	-0.00157	0.00297
	681.02	-0.00227	0.00318
	681.59	-0.0019	0.00351
	682.16	-0.00141	0.00387
	682.73	-0.00177	0.00417
	683.3	-0.000521246	0.00429
	683.87	-0.000683578	0.00432
	684.44	-0.000112482	0.00429
	685.01	0.00101	0.00417
	685.58	0.00136	0.004
	686.15	0.00272	0.00386
	686.72	0.00319	0.00385
	687.29	0.00416	0.00395
	687.86	0.00557	0.00412
	688.43	0.00666	0.00442
	689	0.00736	0.00467
	689.57	0.00672	0.00485
	690.14	0.00613	0.0051
	690.71	0.0054	0.00531
	691.28	0.00493	0.00549
	691.84	0.00395	0.0057
	692.41	0.00316	0.00594
	692.98	0.00343	0.00625
	693.55	0.00326	0.00641
	694.12	0.00327	0.00653
	694.69	0.00245	0.00666
	695.26	0.00174	0.00673
	695.83	0.0018	0.00679
	696.4	0.000806748	0.00667
	696.97	4.39826e-05	0.00657
	697.53	4.20268e-05	0.00661
	698.1	0.000180889	0.00667
	698.67	0.00093192	0.00673
	699.24	0.00163	0.00686
	699.81	0.00152	0.00701
	700.38	0.00203	0.00721
	700.95	0.00294	0.00747
	701.51	0.00245	0.00752
	702.08	0.003	0.0075
	702.65	0.00305	0.00757
	703.22	0.00232	0.00753
	703.79	0.00339	0.0075
	704.36	0.00296	0.0075
	704.92	0.00309	0.00759
	705.49	0.00414	0.00779
	706.06	0.00362	0.00792
	706.63	0.00428	0.008
	707.2	0.00468	0.00809
	707.77	0.00359	0.00822
	708.33	0.00352	0.00827
	708.9	0.00308	0.00826
	709.47	0.00221	0.00829
	710.04	0.00136	0.00844
	710.6	-0.000251344	0.00863
	711.17	-0.000585788	0.0088
	711.74	-0.000982817	0.00913
	712.31	-0.00181	0.00949
	712.88	-0.00169	0.00991
	713.44	-0.000800927	0.01041
	714.01	-0.000274814	0.01083
	714.58	4.86646e-06	0.01123
	715.14	0.00171	0.01157
	715.71	0.00327	0.01176
	716.28	0.00412	0.01194
	716.85	0.00341	0.0121
	717.41	0.00222	0.01212
	717.98	0.00254	0.01231
	718.55	0.00249	0.01253
	719.12	0.00139	0.01266
	719.68	0.00101	0.01278
	720.25	0.00235	0.01268
	720.82	0.00433	0.01249
	721.38	0.00616	0.0122
	721.95	0.00709	0.01177
	722.52	0.00702	0.01127
	723.08	0.00736	0.01068
	723.65	0.00796	0.01001
	724.22	0.00717	0.00937
	724.78	0.00562	0.00879
	725.35	0.00482	0.00825
	725.92	0.00422	0.00777
	726.48	0.00434	0.00733
	727.05	0.00412	0.00699
	727.62	0.0032	0.00673
	728.18	0.00324	0.00639
	728.75	0.00321	0.00602
	729.32	0.0026	0.0057
	729.88	0.00203	0.00527
	730.45	0.00158	0.00487
	731.01	0.00129	0.00449
	731.58	0.00166	0.00406
	732.15	0.00175	0.00382
	732.71	0.00197	0.00356
	733.28	0.00283	0.00327
	733.84	0.00338	0.00309
	734.41	0.00329	0.00288
	734.98	0.00331	0.00281
	735.54	0.00338	0.0028
	736.11	0.00286	0.00289
	736.67	0.00231	0.00314
	737.24	0.00186	0.00345
	737.8	0.00259	0.00375
	738.37	0.00305	0.00386
	738.94	0.00265	0.00405
	739.5	0.00336	0.00422
	740.07	0.00401	0.0044
	740.63	0.00509	0.00437
	741.2	0.0062	0.00423
	741.76	0.00667	0.00437
	742.33	0.00684	0.00442
	742.89	0.006	0.0045
	743.46	0.00563	0.00449
	744.02	0.0061	0.00444
	744.59	0.00708	0.00446
	745.15	0.00581	0.00443
	745.72	0.00573	0.00439
	746.28	0.00757	0.0045
	746.85	0.00832	0.00464
	747.41	0.0096	0.00464
	747.98	0.00892	0.00474
	748.54	0.0087	0.00493
	749.11	0.00754	0.00515
	749.67	0.00492	0.00532
	750.24	0.00288	0.00532
	750.8	0.000949522	0.00532
	751.37	-0.000738341	0.00544
	751.93	-0.00208	0.00546
	752.49	-0.00183	0.00541
	753.06	-0.00039803	0.00534
	753.62	0.00165	0.00514
	754.19	0.00296	0.00513
	754.75	0.00423	0.00525
	755.32	0.00476	0.00549
	755.88	0.00467	0.00591
	756.44	0.00315	0.00626
	757.01	0.0012	0.00698
	757.57	0.00158	0.0079
	758.14	0.000861511	0.00864
	758.7	0.000658107	0.00936
	759.26	0.000918229	0.0099
	759.83	0.000724604	0.0106
	760.39	0.0019	0.01134
	760.95	0.00258	0.0119
	761.52	0.00337	0.01247
	762.08	0.00433	0.01299
	762.65	0.00577	0.01349
	763.21	0.00744	0.014
	763.77	0.00866	0.01445
	764.34	0.01017	0.01487
	764.9	0.01119	0.01506
	765.46	0.01128	0.01523
	766.03	0.01134	0.01559
	766.59	0.01154	0.01593
	767.15	0.01036	0.01622
	767.72	0.01019	0.0162
	768.28	0.01074	0.01612
	768.84	0.00982	0.01597
	769.41	0.009	0.01568
	769.97	0.00805	0.01543
	770.53	0.00643	0.01491
	771.09	0.00665	0.01443
	771.66	0.00646	0.01388
	772.22	0.00476	0.01338
	772.78	0.00471	0.01315
	773.35	0.00334	0.01284
	773.91	0.00246	0.01239
	774.47	0.00192	0.01192
	775.03	0.000525112	0.01152
	775.6	0.000890848	0.01111
	776.16	0.000442968	0.01058
	776.72	-0.000818529	0.00982
	777.28	-0.000908496	0.00898
	777.85	-0.0012	0.00825
	778.41	-0.00186	0.00753
	778.97	-0.00386	0.00689
	779.53	-0.00614	0.00614
	780.09	-0.00623	0.00546
	780.66	-0.00494	0.00488
	781.22	-0.00333	0.00441
	781.78	-0.0023	0.00398
	782.34	0.000822394	0.00344
	782.9	0.00417	0.00312
	783.47	0.00558	0.00288
	784.03	0.00636	0.00283
	784.59	0.00582	0.00305
	785.15	0.00609	0.00344
	785.71	0.00531	0.00402
	786.27	0.00288	0.00471
	786.84	0.000667886	0.0055
	787.4	-0.00166	0.0064
	787.96	-0.00316	0.00726
	788.52	-0.0056	0.00799
	789.08	-0.00727	0.00854
	789.64	-0.00724	0.00902
	790.2	-0.0074	0.00943
	790.77	-0.00611	0.00979
	791.33	-0.00396	0.01019
	791.89	-0.0019	0.01062
	792.45	0.000509465	0.01102
	793.01	0.0021	0.01145
	793.57	0.00375	0.01183
	794.13	0.00606	0.01199
	794.69	0.00668	0.01201
	795.25	0.00666	0.01188
	795.82	0.0069	0.01174
	796.38	0.00779	0.01141
	796.94	0.00832	0.01106
	797.5	0.00817	0.01076
	798.06	0.00888	0.01062
	798.62	0.00964	0.01062
	799.18	0.0095	0.01041
	799.74	0.00831	0.01032
	800.3	0.00781	0.01035
	800.86	0.00605	0.01036
	801.42	0.0045	0.01049
	801.98	0.00328	0.01063
	802.54	0.0021	0.01069
	803.1	0.00357	0.01075
	803.66	0.00452	0.01077
	804.22	0.00557	0.01073
	804.78	0.00704	0.01065
	805.34	0.0064	0.01046
	805.9	0.0067	0.0102
	806.46	0.00868	0.01009
	807.02	0.00813	0.01013
	807.58	0.00833	0.01015
	808.14	0.00925	0.01035
	808.7	0.01066	0.01074
	809.26	0.01359	0.01125
	809.82	0.0132	0.01206
	810.38	0.01134	0.01302
	810.94	0.01023	0.014
	811.5	0.00841	0.01486
	812.06	0.00453	0.01563
	812.62	0.00159	0.01658
	813.18	-0.00106	0.01737
	813.74	-0.00478	0.01796
	814.3	-0.0047	0.0183
	814.86	-0.00491	0.01861
	815.41	-0.0039	0.01911
	815.97	-0.00217	0.01947
	816.53	-0.0042	0.01957
	817.09	-0.00193	0.0196
	817.65	-0.000517334	0.01953
	818.21	-0.000759855	0.01931
	818.77	0.000280635	0.01914
	819.33	-0.00111	0.01881
	819.89	-0.000118349	0.01841
	820.45	-0.000789192	0.01804
	821	-0.00248	0.01758
	821.56	-0.00336	0.01733
	822.12	-0.00471	0.0172
	822.68	-0.00445	0.01697
	823.24	-0.00531	0.01676
	823.8	-0.00564	0.01655
	824.36	-0.00468	0.01631
	824.91	-0.00344	0.01593
	825.47	-0.00297	0.01544
	826.03	-0.000941745	0.01473
	826.59	-8.8242e-06	0.01404
	827.15	0.000415586	0.01352
	827.7	0.00274	0.01293
	828.26	0.00139	0.01258
	828.82	0.00125	0.01241
	829.38	0.00155	0.01228
	829.94	-0.000151598	0.01241
	830.49	0.00058183	0.01246
	831.05	0.00164	0.01239
	831.61	0.0027	0.01251
	832.17	0.00461	0.0126
	832.73	0.00603	0.01265
	833.28	0.00719	0.01269
	833.84	0.00759	0.01279
	834.4	0.00675	0.01306
	834.96	0.00483	0.01339
	835.51	0.00429	0.01374
	836.07	0.00498	0.01407
	836.63	0.00489	0.01453
	837.19	0.00475	0.01506
	837.74	0.00413	0.01539
	838.3	0.00515	0.01558
	838.86	0.00593	0.01571
	839.41	0.00469	0.01568
	839.97	0.0041	0.01544
	840.53	0.00334	0.01498
	841.09	0.00189	0.01461
	841.64	-0.000149642	0.01438
	842.2	-0.00348	0.01441
	842.76	-0.00443	0.0145
	843.31	-0.00468	0.01454
	843.87	-0.00762	0.01489
	844.43	-0.00887	0.01506
	844.98	-0.00924	0.01518
	845.54	-0.00847	0.01547
	846.1	-0.00723	0.01545
	846.65	-0.0066	0.01553
	847.21	-0.00593	0.01564
	847.77	-0.00398	0.01563
	848.32	-0.0018	0.0157
	848.88	0.000392117	0.01559
	849.43	0.00484	0.01517
	849.99	0.00697	0.01458
	850.55	0.00866	0.01396
	851.1	0.00966	0.01332
	851.66	0.00878	0.01299
	852.21	0.01005	0.0129
	852.77	0.0096	0.01276
	853.33	0.00758	0.01291
	853.88	0.00533	0.01314
	854.44	0.00201	0.01345
	854.99	-9.87914e-05	0.01392
	855.55	-0.00151	0.01433
	856.11	-0.00353	0.01495
	856.66	-0.00642	0.01584
	857.22	-0.00883	0.01696
	857.77	-0.00962	0.01827
	858.33	-0.00732	0.01964
	858.88	-0.00488	0.02098
	859.44	-0.00477	0.02217
	859.99	-0.00323	0.02319
	860.55	0.000843908	0.02396
	861.1	0.00306	0.02456
	861.66	0.0031	0.02499
	862.21	0.00425	0.02536
	862.77	0.00461	0.0258
	863.32	0.00568	0.02624
	863.88	0.00397	0.02661
	864.43	0.00206	0.02703
	864.99	0.00447	0.0277
	865.54	0.00414	0.02869
	866.1	0.0025	0.02989
	866.65	0.00186	0.03076
	867.21	0.00315	0.03148
	867.76	0.00368	0.03192
	868.32	0.00217	0.03193
	868.87	0.000681576	0.03188
	869.43	0.000417542	0.03142
	869.98	0.00187	0.03082
	870.54	0.00186	0.03017
	871.09	0.00139	0.0295
	871.64	0.000906494	0.02905
	872.2	0.00104	0.02847
	872.75	0.0024	0.02763
	873.31	0.00278	0.02637
	873.86	0.00159	0.02512
	874.41	0.000495774	0.02382
	874.97	0.000626814	0.02232
	875.52	0.00221	0.021
	876.08	0.00362	0.01982
	876.63	0.00281	0.01915
	877.18	0.00202	0.01858
	877.74	0.00179	0.01783
	878.29	0.00273	0.01734
	878.85	0.00297	0.01689
	879.4	0.00239	0.01645
	879.95	0.00285	0.01588
	880.51	0.00335	0.01508
	881.06	0.00554	0.0145
	881.61	0.00704	0.01408
	882.17	0.00732	0.01353
	882.72	0.00833	0.01331
	883.27	0.00884	0.01323
	883.83	0.00943	0.0134
	884.38	0.00905	0.01398
	884.93	0.00734	0.01441
	885.49	0.00571	0.01484
	886.04	0.00514	0.01543
	886.59	0.00525	0.01612
	887.14	0.00393	0.01674
	887.7	0.00279	0.01704
	888.25	0.00278	0.01715
	888.8	0.00404	0.01741
	889.35	0.00368	0.01801
	889.91	0.00302	0.01836
	890.46	0.00309	0.0183
	891.01	0.00163	0.01839
	891.57	0.00264	0.01858
	892.12	0.00235	0.01884
	892.67	0.00198	0.01882
	893.22	0.00398	0.01854
	893.77	0.00421	0.01851
	894.33	0.00573	0.01856
	894.88	0.0063	0.01872
	895.43	0.0047	0.01898
	895.98	0.00449	0.01941
	896.54	0.00348	0.02007
	897.09	0.000552493	0.02062
	897.64	-0.00238	0.02114
	898.19	-0.00316	0.02152
	898.74	-0.00172	0.02158
	899.3	-0.000345223	0.02131
	899.85	-0.000229831	0.0206
	900.4	-0.000323709	0.01985
	900.95	0.0022	0.01916
	901.5	0.00415	0.01852
	902.05	0.00328	0.01795
	902.6	0.00234	0.01735
	903.16	0.00176	0.01692
	903.71	0.00208	0.01689
	904.26	0.000869334	0.01709
	904.81	-0.00163	0.01729
	905.36	-0.00392	0.01735
	905.91	-0.00549	0.01743
	906.46	-0.00728	0.01786
	907.02	-0.00739	0.01835
	907.57	-0.00633	0.01869
	908.12	-0.00461	0.01883
	908.67	-0.00235	0.01909
	909.22	-0.00258	0.01978
	909.77	-0.000529069	0.02058
	910.32	0.00246	0.02133
	910.87	0.00269	0.02197
	911.42	0.00244	0.02249
	911.97	0.00275	0.02296
	912.52	0.00316	0.02338
	913.07	0.00457	0.02342
	913.62	0.00435	0.02318
	914.17	0.00258	0.02293
	914.73	0.000613123	0.02257
	915.28	-0.000879159	0.02244
	915.83	-0.0015	0.02232
	916.38	-0.00208	0.02213
	916.93	-0.00165	0.0222
	917.48	-0.00195	0.02221
	918.03	-0.00122	0.0224
	918.58	0.000730471	0.02248
	919.13	0.0015	0.02252
	919.68	0.00223	0.02251
	920.23	0.00273	0.02218
	920.78	0.00256	0.02175
	921.33	0.00269	0.02108
	921.88	0.0026	0.02041
	922.43	0.00221	0.01966
	922.97	0.00277	0.01883
	923.52	0.00311	0.01808
	924.07	0.00283	0.01762
	924.62	0.00287	0.01753
	925.17	0.00268	0.01746
	925.72	0.00363	0.01729
	926.27	0.0043	0.01713
	926.82	0.00332	0.0169
	927.37	0.00243	0.01657
	927.92	0.00283	0.01596
	928.47	0.00374	0.01502
	929.02	0.00319	0.01436
	929.57	0.00117	0.01383
	930.12	0.000317796	0.01327
	930.66	0.0016	0.01324
	931.21	0.00226	0.01328
	931.76	0.0012	0.01363
	932.31	-0.00125	0.01424
	932.86	-0.00228	0.01483
	933.41	-0.00178	0.01584
	933.96	-0.00208	0.0165
	934.51	-0.00151	0.01735
	935.05	-0.000388251	0.01844
	935.6	0.000482084	0.01948
	936.15	0.00378	0.02071
	936.7	0.00665	0.02169
	937.25	0.00845	0.02299
	937.8	0.00943	0.02443
	938.34	0.0071	0.02568
	938.89	0.00711	0.0268
	939.44	0.00682	0.02785
	939.99	0.00431	0.02893
	940.54	0.00259	0.02965
	941.08	-5.96752e-05	0.03007
	941.63	-0.000646418	0.03029
	942.18	-0.00136	0.0302
	942.73	-0.00285	0.03013
	943.28	-0.00165	0.02994
	943.82	-0.00083222	0.02961
	944.37	-0.000620992	0.02945
	944.92	0.000761764	0.02937
	945.47	0.000188712	0.02917
	946.01	0.000914317	0.02908
	946.56	0.00175	0.02875
	947.11	0.000341266	0.02837
	947.66	0.00165	0.02824
	948.2	-1.078e-05	0.02791
	948.75	-8.31449e-05	0.02753
	949.3	0.00137	0.02722
	949.84	0.000237608	0.02712
	950.39	0.00147	0.02697
	950.94	-0.000321754	0.02646
	951.49	-0.000407809	0.02567
	952.03	0.00115	0.02508
	952.58	0.00114	0.02469
	953.13	0.00354	0.02372
	953.67	0.00375	0.02233
	954.22	0.00343	0.02117
	954.77	0.00475	0.02028
	955.31	0.00379	0.01942
	955.86	0.00239	0.01805
	956.41	0.000589653	0.0165
	956.95	-0.00251	0.01539
	957.5	-0.00341	0.01469
	958.05	-0.00246	0.01437
	958.59	-0.0016	0.01405
	959.14	-0.00144	0.01372
	959.68	-0.000630771	0.01368
	960.23	0.000493819	0.01375
	960.78	0.000843908	0.01394
	961.32	0.00124	0.01419
	961.87	0.000354956	0.01434
	962.41	0.000667886	0.01461
	962.96	0.00284	0.01489
	963.51	0.00287	0.01508
	964.05	0.00316	0.01493
	964.6	0.00278	0.01451
	965.14	0.00123	0.01385
	965.69	-5.38078e-05	0.01297
	966.23	-0.0016	0.01193
	966.78	-0.00346	0.0111
	967.33	-0.00602	0.01083
	967.87	-0.00965	0.01075
	968.42	-0.01126	0.01097
	968.96	-0.01095	0.01173
	969.51	-0.01208	0.01316
	970.05	-0.01246	0.01474
	970.6	-0.01338	0.01621
	971.14	-0.01117	0.01754
	971.69	-0.00832	0.01927
	972.23	-0.00586	0.02106
	972.78	-0.00182	0.022
	973.32	-0.0018	0.02217
	973.87	-0.00156	0.02175
	974.41	0.000900627	0.0214
	974.96	0.0038	0.02135
	975.5	0.00712	0.02121
	976.05	0.00921	0.02101
	976.59	0.00991	0.02074
	977.13	0.01068	0.02075
	977.68	0.01119	0.02095
	978.22	0.00999	0.02094
	978.77	0.00674	0.02114
	979.31	0.00295	0.02137
	979.86	-0.000323709	0.02201
	980.4	-0.00183	0.02333
	980.94	-0.000589699	0.02479
	981.49	0.00114	0.02664
	982.03	0.00185	0.02876
	982.58	0.00204	0.03038
	983.12	0.00299	0.03156
	983.66	0.00221	0.03225
	984.21	0.00259	0.03256
	984.75	0.000767632	0.03255
	985.3	-0.00327	0.03183
	985.84	-0.00133	0.03045
	986.38	-0.000951524	0.02889
	986.93	-0.00122	0.02752
	987.47	-0.000499732	0.02578
	988.01	-0.00249	0.02423
	988.56	-0.00261	0.0232
	989.1	-0.00227	0.02295
	989.64	-0.00533	0.02339
	990.19	-0.00678	0.02387
	990.73	-0.0077	0.02454
	991.27	-0.00929	0.02532
	991.82	-0.00838	0.02615
	992.36	-0.00892	0.02682
	992.9	-0.00947	0.02717
	993.45	-0.0096	0.02757
	993.99	-0.00871	0.02811
	994.53	-0.00615	0.02813
	995.07	-0.00517	0.02789
	995.62	-0.0044	0.02767
	996.16	-0.00282	0.02696
	996.7	-0.00115	0.02607
	997.25	0.00153	0.025
	997.79	0.00233	0.02367
	998.33	0.00135	0.02263
	998.87	0.00199	0.02188
	999.42	0.0024	0.02101
	999.96	0.00244	0.02047
	1000.5	0.00111	0.02037
	1001.04	-2.95678e-06	0.0202
	1001.58	0.000268901	0.02094
	1002.13	0.000507509	0.02203
	1002.67	0.00221	0.02328
	1003.21	0.00366	0.02488
	1003.75	0.00612	0.02593
	1004.29	0.00894	0.02688
	1004.84	0.01033	0.02733
	1005.38	0.00896	0.02757
	1005.92	0.00723	0.02773
	1006.46	0.00617	0.02719
	1007	0.00406	0.02671
	1007.54	0.00444	0.02623
	1008.09	0.00231	0.02575
	1008.63	0.00185	0.02573
	1009.17	0.004	0.02557
	1009.71	0.0036	0.02538
	1010.25	0.00412	0.02561
	1010.79	0.0047	0.02617
	1011.33	0.00478	0.02689
	1011.87	0.00439	0.02757
	1012.42	0.00204	0.028
	1012.96	-0.00066402	0.02796
	1013.5	-0.00118	0.02782
	1014.04	-0.00231	0.02764
	1014.58	-0.00268	0.02688
	1015.12	-0.00337	0.02633
	1015.66	-0.0037	0.02558
	1016.2	-0.00185	0.02457
	1016.74	-0.0016	0.02422
	1017.28	-0.00153	0.02349
	1017.82	-0.000973038	0.02283
	1018.36	-0.00203	0.02217
	1018.9	-0.00354	0.02107
	1019.45	-0.00261	0.02041
	1019.99	-0.00148	0.01974
	1020.53	-0.00044497	0.01924
	1021.07	0.000904538	0.01872
	1021.61	0.00151	0.01809
	1022.15	0.00411	0.01851
	1022.69	0.0064	0.01938
	1023.23	0.00521	0.02046
	1023.77	0.00756	0.02191
	1024.31	0.00845	0.023
	1024.85	0.00723	0.02411
	1025.39	0.0067	0.02494
	1025.93	0.00361	0.02487
	1026.47	0.00334	0.02446
	1027.01	0.00287	0.02372
	1027.54	0.0015	0.02272
	1028.08	0.00203	0.02176
	1028.62	0.0023	0.02125
	1029.16	0.00292	0.02133
	1029.7	0.0035	0.02158
	1030.24	0.0017	0.02236
	1030.78	0.00055836	0.02314
	1031.32	-0.00165	0.02425
	1031.86	-0.00138	0.02595
	1032.4	-0.00309	0.0273
	1032.94	-0.00533	0.02858
	1033.48	-0.00318	0.02974
	1034.02	-0.00331	0.03062
	1034.55	-0.00177	0.03155
	1035.09	-0.00197	0.03269
	1035.63	-0.00195	0.03381
	1036.17	0.000159375	0.03472
	1036.71	-0.000581876	0.0359
	1037.25	-8.11891e-05	0.03727
	1037.79	0.0039	0.03769
	1038.33	0.00739	0.03742
	1038.86	0.00905	0.03687
	1039.4	0.0096	0.03566
	1039.94	0.01177	0.03476
	1040.48	0.01514	0.03331
	1041.02	0.01613	0.03206
	1041.56	0.01326	0.03249
	1042.09	0.00997	0.03291
	1042.63	0.00847	0.03378
	1043.17	0.00693	0.03526
	1043.71	0.00518	0.03736
	1044.25	0.00261	0.03969
	1044.78	0.00041363	0.04158
	1045.32	0.00233	0.04365
	1045.86	0.00398	0.04578
	1046.4	0.00221	0.04749
	1046.93	-0.000791148	0.04823
	1047.47	-0.00233	0.04782
	1048.01	-0.0029	0.04699
	1048.55	-0.00398	0.0463
	1049.08	-0.00566	0.04457
	1049.62	-0.00903	0.0427
	1050.16	-0.00589	0.04179
	1050.7	-0.00243	0.04065
	1051.23	-0.00381	0.04025
	1051.77	-0.00545	0.04014
	1052.31	-0.00869	0.04014
	1052.84	-0.00749	0.04022
	1053.38	-0.00572	0.03974
	1053.92	-0.0046	0.03967
	1054.46	-0.0051	0.03991
	1054.99	-0.00631	0.04061
	1055.53	-0.00181	0.04037
	1056.07	0.000589653	0.04092
	1056.6	0.00316	0.04259
	1057.14	0.00489	0.04324
	1057.68	0.00502	0.04345
	1058.21	0.00813	0.04281
	1058.75	0.01169	0.04192
	1059.28	0.01064	0.04124
	1059.82	0.00575	0.03967
	1060.36	0.00136	0.03763
	1060.89	0.00283	0.03585
	1061.43	0.00195	0.03392
	1061.97	-0.00197	0.03335
	1062.5	-0.00121	0.03349
	1063.04	-0.00282	0.03418
	1063.57	0.00376	0.03528
	1064.11	0.00403	0.03613
	1064.65	-0.00074812	0.03794
	1065.18	0.00353	0.03991
	1065.72	0.00314	0.04103
	1066.25	0.0037	0.04188
	1066.79	0.00596	0.04171
	1067.32	0.00499	0.04131
	1067.86	0.0104	0.04069
	1068.4	0.00999	0.03989
	1068.93	0.00553	0.04018
	1069.47	0.00886	0.04021
	1070	0.0086	0.03985
	1070.54	0.01191	0.03953
	1071.07	0.01029	0.04054
	1071.61	0.00793	0.04199
	1072.14	0.00905	0.04248
	1072.68	0.00898	0.04268
	1073.21	0.01056	0.04388
	1073.75	0.00909	0.046
	1074.28	0.009	0.04831
	1074.82	0.00931	0.04911
	1075.35	0.01326	0.05041
	1075.89	0.01762	0.05289
	1076.42	0.01956	0.05465
	1076.95	0.01371	0.056
	1077.49	0.00776	0.05565
	1078.02	0.01013	0.05546
	1078.56	0.01003	0.05543
	1079.09	0.00704	0.05547
	1079.63	0.00423	0.05607
	1080.16	0.00716	0.057
	1080.7	0.01547	0.05838
	1081.23	0.01789	0.05919
	1081.76	0.01459	0.06052
	1082.3	0.0166	0.06264
	1082.83	0.01934	0.06451
	1083.37	0.01813	0.06533
	1083.9	0.01398	0.06498
	1084.43	0.0133	0.06481
	1084.97	0.01838	0.0659
	1085.5	0.02063	0.06723
	1086.03	0.01799	0.06746
	1086.57	0.01684	0.06709
	1087.1	0.01649	0.06585
	1087.63	0.02179	0.06469
	1088.17	0.02159	0.06357
	1088.7	0.01819	0.06238
	1089.23	0.0212	0.06125
	1089.77	0.01932	0.06019
	1090.3	0.02284	0.06088
	1090.83	0.02709	0.06107
	1091.37	0.02803	0.06176
	1091.9	0.03016	0.06077
	1092.43	0.02855	0.05813
	1092.97	0.02163	0.05827
	1093.5	0.02398	0.05849
	1094.03	0.02437	0.05812
	1094.56	0.02053	0.05557
	1095.1	0.01944	0.05352
	1095.63	0.01729	0.05024
	1096.16	0.02202	0.05184
	1096.69	0.02824	0.05258
	1097.23	0.03354	0.05261
	1097.76	0.03575	0.05522
	1098.29	0.03325	0.0601
	1098.82	0.03198	0.06389
	1099.36	0.0249	0.05812
	1099.89	0.02988	0.03556
	1100.42	0.00522	0.05372

## Sheet: Fig. 1B
	Wavelength	Norm PL int	Norm PL int	PL int	PL int
	nm			a.u.	a.u.
		Cd pH5 1d 1val 405 10-2,5	cd pH7 1d	Cd pH5 1d 1val 405 10-2,5	cd pH7 1d
	550	-0.000279184	--	-0.21488	--
	550.5	-0.000315956	--	-0.24318	--
	551	-0.0003462	--	-0.26646	--
	551.5	-0.000369916	--	-0.28471	--
	552	-0.000387105	--	-0.29794	--
	552.5	-0.000397766	--	-0.30614	--
	553	-0.000401899	--	-0.30932	--
	553.5	-0.000399504	--	-0.30748	--
	554	-0.000390582	--	-0.30062	--
	554.5	-0.000375132	--	-0.28872	--
	555	-0.000353155	--	-0.27181	--
	555.5	-0.00032465	--	-0.24987	--
	556	-0.000289617	--	-0.22291	--
	556.5	-0.000181945	--	-0.14004	--
	557	-0.000185847	--	-0.14304	--
	557.5	-0.000182587	--	-0.14053	--
	558	-0.000115309	--	-0.08875	--
	558.5	-3.85257e-05	--	-0.02965	--
	559	-1.1231e-06	--	-0.000864403	--
	559.5	0.000111143	--	0.08554	--
	560	0.000279692	--	0.21527	--
	560.5	0.000344246	--	0.26495	--
	561	0.000387565	--	0.29829	--
	561.5	0.000465624	--	0.35837	--
	562	0.000559519	--	0.43064	--
	562.5	0.000787687	--	0.60625	--
	563	0.000916783	0.00208	0.70561	1.711
	563.5	0.00115	0.00218	0.88527	1.795
	564	0.0013	0.00236	1.00402	1.942
	564.5	0.00128	0.00254	0.98286	2.092
	565	0.00147	0.00245	1.13046	2.017
	565.5	0.0016	0.00268	1.22778	2.206
	566	0.00172	0.00279	1.32013	2.298
	566.5	0.0019	0.00306	1.46524	2.52
	567	0.00201	0.00322	1.54544	2.655
	567.5	0.00209	0.00334	1.60779	2.746
	568	0.00219	0.00315	1.68814	2.591
	568.5	0.00235	0.00385	1.81222	3.172
	569	0.00251	0.00391	1.93255	3.216
	569.5	0.0026	0.00442	2.00456	3.636
	570	0.00271	0.00449	2.08254	3.696
	570.5	0.0028	0.00504	2.15206	4.15
	571	0.00308	0.00537	2.36736	4.421
	571.5	0.00332	0.00545	2.55398	4.491
	572	0.00356	0.00597	2.73872	4.913
	572.5	0.0038	0.00643	2.92686	5.29
	573	0.00411	0.00654	3.16407	5.386
	573.5	0.00434	0.0068	3.33967	5.597
	574	0.00465	0.00734	3.57955	6.039
	574.5	0.00505	0.00759	3.88966	6.252
	575	0.00541	0.00795	4.16164	6.542
	575.5	0.00586	0.00879	4.50896	7.234
	576	0.00632	0.0088	4.86666	7.241
	576.5	0.00695	0.00939	5.34935	7.727
	577	0.00752	0.00951	5.78633	7.83
	577.5	0.00821	0.01084	6.31719	8.926
	578	0.00869	0.01133	6.68766	9.326
	578.5	0.00912	0.01173	7.01612	9.654
	579	0.00967	0.01229	7.4389	10.119
	579.5	0.01008	0.013	7.75842	10.705
	580	0.01057	0.01296	8.13546	10.671
	580.5	0.01121	0.01366	8.62632	11.25
	581	0.01178	0.01547	9.06843	12.735
	581.5	0.01221	0.01655	9.39771	13.624
	582	0.01276	0.01684	9.8235	13.864
	582.5	0.01349	0.01715	10.3849	14.121
	583	0.01424	0.01827	10.9575	15.038
	583.5	0.01485	0.02007	11.4324	16.524
	584	0.01566	0.02116	12.0499	17.42
	584.5	0.01646	0.0221	12.6653	18.195
	585	0.01738	0.02348	13.3733	19.331
	585.5	0.01849	0.02468	14.2327	20.322
	586	0.01967	0.02619	15.1417	21.564
	586.5	0.0211	0.02849	16.242	23.454
	587	0.0225	0.0303	17.3189	24.943
	587.5	0.02382	0.0311	18.3325	25.603
	588	0.02532	0.03361	19.4886	27.672
	588.5	0.02736	0.03668	21.0613	30.197
	589	0.02937	0.03861	22.6019	31.785
	589.5	0.03168	0.04209	24.3791	34.656
	590	0.03316	0.04381	25.5249	36.068
	590.5	0.03574	0.04537	27.5091	37.354
	591	0.03898	0.04957	29.9996	40.811
	591.5	0.04212	0.05287	32.4184	43.531
	592	0.04567	0.05685	35.1507	46.808
	592.5	0.04951	0.0623	38.1033	51.292
	593	0.05339	0.06718	41.0907	55.309
	593.5	0.05754	0.07158	44.2887	58.929
	594	0.06211	0.07728	47.8	63.628
	594.5	0.06685	0.08322	51.4537	68.517
	595	0.07199	0.08989	55.4047	74.01
	595.5	0.07755	0.09795	59.6845	80.642
	596	0.08366	0.10422	64.3894	85.806
	596.5	0.09036	0.11407	69.5496	93.912
	597	0.09749	0.12309	75.0378	101.344
	597.5	0.10491	0.13003	80.7439	107.056
	598	0.11274	0.14143	86.7687	116.442
	598.5	0.12126	0.15302	93.3308	125.981
	599	0.13004	0.16248	100.089	133.771
	599.5	0.14005	0.17636	107.788	145.196
	600	0.15059	0.18799	115.905	154.773
	600.5	0.16204	0.20093	124.717	165.428
	601	0.17362	0.21508	133.627	177.078
	601.5	0.1862	0.22928	143.311	188.766
	602	0.19973	0.24825	153.725	204.387
	602.5	0.21496	0.26399	165.444	217.343
	603	0.23068	0.28237	177.546	232.476
	603.5	0.24659	0.30567	189.787	251.655
	604	0.26358	0.32253	202.869	265.537
	604.5	0.2811	0.33761	216.348	277.956
	605	0.29952	0.36206	230.529	298.083
	605.5	0.31936	0.38101	245.795	313.684
	606	0.3398	0.40397	261.533	332.588
	606.5	0.36115	0.43082	277.963	354.699
	607	0.38406	0.45216	295.592	372.263
	607.5	0.40753	0.47902	313.661	394.378
	608	0.43138	0.50636	332.014	416.89
	608.5	0.45697	0.53101	351.712	437.182
	609	0.48287	0.55851	371.644	459.823
	609.5	0.50918	0.58389	391.892	480.722
	610	0.5366	0.61421	412.999	505.678
	610.5	0.5644	0.64306	434.395	529.434
	611	0.59251	0.67124	456.027	552.635
	611.5	0.62082	0.6919	477.823	569.642
	612	0.64845	0.7262	499.084	597.88
	612.5	0.67622	0.74865	520.461	616.363
	613	0.70418	0.77729	541.975	639.943
	613.5	0.73204	0.80327	563.423	661.334
	614	0.75949	0.82484	584.546	679.09
	614.5	0.78604	0.84543	604.986	696.042
	615	0.81173	0.87167	624.754	717.649
	615.5	0.83589	0.8904	643.353	733.068
	616	0.85944	0.9165	661.479	754.555
	616.5	0.88135	0.93081	678.337	766.335
	617	0.90198	0.94967	694.217	781.863
	617.5	0.92079	0.96278	708.691	792.658
	618	0.93759	0.96919	721.627	797.937
	618.5	0.95315	0.97301	733.601	801.084
	619	0.96693	0.98799	744.206	813.415
	619.5	0.97824	0.99583	752.91	819.866
	620	0.98668	1	759.408	823.303
	620.5	0.99352	0.99584	764.674	819.878
	621	0.9981	0.98979	768.193	814.896
	621.5	1	0.9817	769.659	808.238
	622	0.99948	0.97805	769.255	805.235
	622.5	0.99602	0.97197	766.594	800.229
	623	0.98961	0.95808	761.658	788.787
	623.5	0.98037	0.94492	754.547	777.955
	624	0.96865	0.92952	745.533	765.278
	624.5	0.95524	0.91531	735.21	753.574
	625	0.94083	0.89436	724.117	736.327
	625.5	0.92461	0.8687	711.636	715.204
	626	0.90676	0.8457	697.893	696.268
	626.5	0.88688	0.82329	682.595	677.818
	627	0.86553	0.80591	666.163	663.51
	627.5	0.84312	0.77884	648.918	641.221
	628	0.82015	0.75644	631.239	622.78
	628.5	0.7959	0.73245	612.569	603.03
	629	0.77117	0.70731	593.536	582.33
	629.5	0.74647	0.68556	574.53	564.423
	630	0.72181	0.65354	555.55	538.064
	630.5	0.69724	0.6313	536.64	519.751
	631	0.67252	0.60972	517.609	501.985
	631.5	0.64762	0.57493	498.449	473.341
	632	0.62268	0.56188	479.25	462.597
	632.5	0.59886	0.53372	460.915	439.414
	633	0.5758	0.51239	443.172	421.855
	633.5	0.55254	0.48898	425.268	402.582
	634	0.52948	0.47166	407.521	388.322
	634.5	0.50695	0.44837	390.18	369.141
	635	0.48412	0.42883	372.609	353.053
	635.5	0.46244	0.40855	355.918	336.357
	636	0.44078	0.38727	339.247	318.844
	636.5	0.41973	0.3723	323.05	306.513
	637	0.4012	0.35032	308.789	288.423
	637.5	0.3831	0.33312	294.858	274.26
	638	0.36507	0.31588	280.98	260.063
	638.5	0.34753	0.29842	267.481	245.694
	639	0.33078	0.28297	254.586	232.967
	639.5	0.31456	0.26672	242.103	219.591
	640	0.29863	0.25277	229.844	208.104
	640.5	0.28326	0.2401	218.013	197.673
	641	0.26864	0.22638	206.757	186.377
	641.5	0.25437	0.21097	195.775	173.693
	642	0.24052	0.19952	185.118	164.265
	642.5	0.22701	0.18813	174.722	154.887
	643	0.21361	0.17823	164.411	146.736
	643.5	0.20172	0.17027	155.254	140.187
	644	0.19052	0.15834	146.632	130.359
	644.5	0.17991	0.15035	138.468	123.781
	645	0.16976	0.14073	130.654	115.863
	645.5	0.16031	0.13175	123.382	108.472
	646	0.15068	0.12361	115.971	101.772
	646.5	0.14129	0.1189	108.743	97.887
	647	0.13197	0.10911	101.568	89.833
	647.5	0.12364	0.10262	95.1617	84.488
	648	0.11517	0.09667	88.6427	79.59
	648.5	0.10801	0.08974	83.13	73.881
	649	0.10256	0.085	78.9367	69.979
	649.5	0.09656	0.08059	74.3212	66.35
	650	0.09074	0.07451	69.8397	61.341
	650.5	0.08474	0.07037	65.2178	57.936
	651	0.07904	0.06604	60.8337	54.367
	651.5	0.07404	0.06152	56.9873	50.648
	652	0.06925	0.05799	53.3025	47.74
	652.5	0.0648	0.05411	49.8709	44.551
	653	0.06059	0.05219	46.6354	42.967
	653.5	0.05657	0.04729	43.5418	38.937
	654	0.05296	0.04461	40.7629	36.729
	654.5	0.04945	0.04143	38.0611	34.108
	655	0.04647	0.03969	35.7672	32.677
	655.5	0.04451	0.03727	34.2582	30.681
	656	0.0419	0.03521	32.252	28.989
	656.5	0.03953	0.03303	30.4259	27.194
	657	0.03721	0.03063	28.6357	25.219
	657.5	0.03504	0.02845	26.9712	23.427
	658	0.03255	0.02567	25.0552	21.138
	658.5	0.03021	0.02437	23.2508	20.065
	659	0.02819	0.02349	21.6967	19.343
	659.5	0.02647	0.02132	20.3739	17.551
	660	0.02475	0.01996	19.0477	16.436
	660.5	0.02318	0.01872	17.8377	15.414
	661	0.02151	0.01794	16.5554	14.77
	661.5	0.02013	0.01717	15.4896	14.134
	662	0.01939	0.01592	14.9231	13.106
	662.5	0.01746	0.01488	13.4382	12.248
	663	0.01612	0.01379	12.4104	11.353
	663.5	0.01511	0.01351	11.629	11.121
	664	0.01396	0.01282	10.7447	10.553
	664.5	0.01297	0.01189	9.98125	9.789
	665	0.01208	0.0105	9.29584	8.647
	665.5	0.01123	0.0104	8.64325	8.566
	666	0.01054	0.00946	8.10924	7.788
	666.5	0.00979	0.00914	7.53794	7.525
	667	0.00893	0.00848	6.8705	6.981
	667.5	0.00817	0.00844	6.28979	6.948
	668	0.00744	0.00791	5.72734	6.512
	668.5	0.00685	0.00721	5.27186	5.937
	669	0.00628	0.00681	4.83504	5.604
	669.5	0.00582	0.00614	4.48313	5.054
	670	0.00541	0.00578	4.16081	4.755
	670.5	0.00504	0.00575	3.88254	4.73
	671	0.00483	0.0055	3.71969	4.532
	671.5	0.00473	0.00495	3.63681	4.077
	672	0.00465	0.00494	3.58035	4.065
	672.5	0.00461	0.0046	3.54895	3.791
	673	0.00452	0.00462	3.4808	3.8
	673.5	0.00469	0.00429	3.61015	3.528
	674	0.0049	0.0039	3.77284	3.209
	674.5	0.00399	0.0041	3.06864	3.378
	675	0.00383	0.00371	2.9491	3.051
	675.5	0.00358	0.0034	2.7549	2.798
	676	0.00337	0.00326	2.59063	2.683
	676.5	0.00313	0.00329	2.40534	2.711
	677	0.0029	0.003	2.231	2.474
	677.5	0.00278	0.00289	2.14156	2.383
	678	0.00274	0.0027	2.11036	2.225
	678.5	0.00245	0.0025	1.88821	2.061
	679	0.00225	0.00253	1.734	2.079
	679.5	0.00214	0.00235	1.64844	1.937
	680	0.00202	0.00229	1.55101	1.887
	680.5	0.00186	0.00204	1.43109	1.677
	681	0.00173	0.00204	1.33516	1.676
	681.5	0.00161	0.00204	1.23715	1.68
	682	0.00146	0.00211	1.12528	1.74
	682.5	0.00134	0.00206	1.03353	1.697
	683	0.00126	0.00172	0.97026	1.414
	683.5	0.00128	0.00168	0.98716	1.382
	684	0.00126	0.00173	0.9712	1.421
	684.5	0.00108	0.00147	0.83384	1.21
	685	0.000864964	0.0014	0.66573	1.149
	685.5	0.000729441	0.0015	0.56142	1.237
	686	0.000629383	0.00162	0.48441	1.334
	686.5	0.00037766	0.00132	0.29067	1.083
	687	0.000204386	0.00127	0.15731	1.047
	687.5	-2.78113e-05	0.001	-0.02141	0.826
	688	-9.71761e-05	0.00118	-0.07479	0.97
	688.5	-0.000158715	0.00118	-0.12216	0.971
	689	-0.000151251	0.001	-0.11641	0.824
	689.5	-0.000101932	0.00104	-0.07845	0.86
	690	-0.000169308	0.00107	-0.13031	0.88
	690.5	3.12974e-05	0.000947403	0.02409	0.78
	691	-9.57749e-05	0.000932828	-0.07371	0.768
	691.5	-0.000184338	0.000832014	-0.14188	0.685
	692	-0.000317415	0.000852663	-0.2443	0.702
	692.5	-0.000472841	0.000947403	-0.36393	0.78
	693	-0.000602054	0.000889102	-0.46338	0.732
	693.5	-0.000678044	0.000817439	-0.52186	0.673
	694	-0.000702998	0.000682616	-0.54107	0.562
	694.5	-0.000709311	0.000927969	-0.54593	0.764
	695	-0.000649622	0.00073606	-0.49999	0.606
	695.5	-0.000574182	0.000642534	-0.44192	0.529
	696	-0.00048299	0.000641319	-0.37174	0.528
	696.5	-0.000376046	0.000547793	-0.28943	0.451
	697	-0.00025335	0.000620671	-0.19499	0.511
	697.5	-0.000114903	0.000608524	-0.08844	0.501
	698	3.92956e-05	0.00054172	0.03024	0.446
	698.5	0.000209246	0.000527145	0.16105	0.434
	699	0.000394948	0.000737274	0.30398	0.607
	699.5	0.000596401	0.000651036	0.45903	0.536
	700	0.000813607	0.000523501	0.6262	0.431
	700.5	0.00105	0.000470058	0.8055	0.387
	701		0.000488277		0.402
	701.5		-5.22286e-05		-0.043
	702		0.000323089		0.266
	702.5		0.000479775		0.395
	703		0.000466414		0.384
	703.5		0.000394751		0.325
	704		0.00049435		0.407
	704.5		0.000440907		0.363
	705		0.000235636		0.194
	705.5		0.000323089		0.266
	706		0.000330377		0.272
	706.5		0.000393537		0.324
	707		6.80187e-05		0.056
	707.5		-7.89503e-05		-0.065
	708		0.000242924		0.2
	708.5		0.000307299		0.253
	709		0.000337664		0.278
	709.5		0.000370459		0.305
	710		0.000371674		0.306
	710.5		0.000284221		0.234
	711		0.00030487		0.251
	711.5		0.000199198		0.164
	712		0.000212558		0.175
	712.5		0.000251426		0.207
	713		0.00014211		0.117
	713.5		-4.12971e-05		-0.034

## Sheet: Fig.2A
	Time	Norm. PL int	Norm. PL int
	h
		Cd QDs pH5 405 nm, 10-2,5	Cd QDs pH3 405 nm, 10-2,5
	1	1	1
	2	0.81429	0.89023
	3	0.64805	0.71429
	9	0.54286	0.36692
	24	0.4039	0.25564
	48	0.28182	0.1188

## Sheet: Fig. 2B
	Wavelength
	nm
		col(g)-col(d)	col(k)-col(d)	col(n)-col(d)	col(e1)-col(d)	col(p1)-col(d)	col(q1)-col(d)	col(r1)-col(d)	col(s1)-col(d)	col(v1)-col(d)	col(y1)-col(d)	col(x1)-col(d)
	563	-0.00012002	-3.38199e-05	-0.0003112	-0.00244	-0.00541	-0.00222	-0.00556	-0.0088	-0.000235879	-0.000194001	-0.00638
	563.5	-2.96165e-05	5.89734e-05	-0.000214044	-0.00248	-0.00499	-0.00238	-0.00536	-0.00872	-0.000132039	-0.000130033	-0.00628
	564	4.09226e-05	0.000133186	-0.000137375	-0.00254	-0.00463	-0.00257	-0.00522	-0.00868	-4.72347e-05	-8.15208e-05	-0.0062
	564.5	9.1636e-05	0.000188857	-8.11532e-05	-0.00264	-0.00432	-0.00276	-0.00513	-0.00868	1.85735e-05	-4.84258e-05	-0.00613
	565	0.000125283	0.000228746	-4.26205e-05	-0.00275	-0.00406	-0.00297	-0.00508	-0.00873	6.81446e-05	-2.79886e-05	-0.00608
	565.5	0.000145954	0.000256944	-1.76854e-05	-0.00288	-0.00386	-0.00319	-0.00508	-0.00881	0.00010557	-1.61181e-05	-0.00604
	566	0.000157518	0.000277318	-2.48035e-06	-0.00303	-0.0037	-0.00341	-0.00511	-0.00893	0.000134717	-8.94675e-06	-0.006
	566.5	0.00016236	0.000292254	5.38127e-06	-0.00319	-0.00359	-0.00363	-0.00518	-0.00907	0.000157972	-4.08801e-06	-0.00597
	567	0.000160792	0.000302066	6.21098e-06	-0.00336	-0.00351	-0.00385	-0.00529	-0.00925	0.000175646	-1.23031e-06	-0.00594
	567.5	0.000162505	0.000305209	-1.53376e-06	-0.00354	-0.00349	-0.00408	-0.00543	-0.00946	0.000186198	-1.91619e-06	-0.00586
	568	0.000147348	0.000299216	-2.032e-05	-0.00374	-0.00351	-0.00431	-0.00562	-0.0097	0.00018716	-8.61273e-06	-0.00578
	568.5	0.000113159	0.000282003	-5.22335e-05	-0.00396	-0.00358	-0.00455	-0.00585	-0.00998	0.000176446	-2.34056e-05	-0.00572
	569	6.12478e-05	0.000269708	-9.7748e-05	-0.00419	-0.0037	-0.00479	-0.00612	-0.0103	0.000153583	-4.67686e-05	-0.00571
	569.5	-3.37218e-06	0.000231089	-0.000177728	-0.00438	-0.00417	-0.00479	-0.0072	-0.01078	8.68868e-05	-6.89729e-05	-0.00577
	570	-7.26987e-05	0.000166059	-0.000260539	-0.00469	-0.00433	-0.00512	-0.00713	-0.01104	6.05061e-05	-0.000111609	-0.00592
	570.5	-0.000137288	0.000119435	-0.000318598	-0.00501	-0.00454	-0.00536	-0.00775	-0.01201	3.20108e-05	-0.000114092	-0.00613
	571	-0.000188261	6.83227e-05	-0.000414259	-0.00528	-0.00472	-0.00557	-0.00822	-0.01228	-5.08755e-05	-0.000145357	-0.00639
	571.5	-0.000219256	2.69458e-05	-0.000465505	-0.00554	-0.00503	-0.00584	-0.00856	-0.01251	-7.20997e-05	-0.000183832	-0.00673
	572	-0.000227784	-7.59584e-06	-0.000502403	-0.00584	-0.00549	-0.00616	-0.00893	-0.01278	-8.64329e-05	-0.000206485	-0.0071
	572.5	-0.000215643	-3.53106e-05	-0.000539485	-0.00607	-0.00575	-0.00638	-0.00933	-0.01325	-6.49985e-05	-0.00022513	-0.00751
	573	-0.000188262	-3.15353e-05	-0.00055227	-0.00624	-0.00618	-0.00671	-0.00962	-0.01392	-4.78915e-05	-0.000207747	-0.00791
	573.5	-0.000153174	-4.5837e-05	-0.000542217	-0.00654	-0.00659	-0.00715	-0.00991	-0.01432	-5.71958e-05	-0.000214201	-0.00834
	574	-0.000118067	-8.75835e-05	-0.0005576	-0.00687	-0.00688	-0.0074	-0.01005	-0.01499	-0.000113206	-0.00019931	-0.00872
	574.5	-8.89373e-05	-0.000100685	-0.000547203	-0.0072	-0.00724	-0.00774	-0.01026	-0.01522	-0.000188723	-0.000225493	-0.00908
	575	-6.88669e-05	-9.43577e-05	-0.000540824	-0.00753	-0.00779	-0.0081	-0.0105	-0.01557	-0.000177007	-0.000335445	-0.00949
	575.5	-5.76957e-05	-9.50752e-05	-0.000564652	-0.00775	-0.00828	-0.00849	-0.01064	-0.0156	-0.000219855	-0.000322349	-0.00991
	576	-5.26227e-05	-0.000132577	-0.000617103	-0.0081	-0.00871	-0.00884	-0.01083	-0.01617	-0.000239227	-0.000369403	-0.01032
	576.5	-4.94707e-05	-0.000132804	-0.000641092	-0.00837	-0.00911	-0.0092	-0.0111	-0.01636	-0.000303202	-0.000417045	-0.01068
	577	-4.41784e-05	-0.000145892	-0.00062431	-0.00874	-0.00952	-0.00984	-0.01117	-0.01639	-0.00038003	-0.000371945	-0.01109
	577.5	-3.40497e-05	-0.000166441	-0.000543221	-0.00931	-0.00975	-0.0102	-0.01128	-0.01656	-0.000356926	-0.000338273	-0.01154
	578	-1.84074e-05	-0.000116886	-0.000585691	-0.00969	-0.01021	-0.01056	-0.01142	-0.01689	-0.000402749	-0.000325015	-0.01198
	578.5	1.47897e-06	-7.05209e-05	-0.000608345	-0.01016	-0.01071	-0.01102	-0.01146	-0.01743	-0.000346697	-0.000336398	-0.01237
	579	2.30682e-05	-3.58724e-05	-0.000660178	-0.01067	-0.0112	-0.01138	-0.0118	-0.01806	-0.000370477	-0.000310764	-0.01279
	579.5	4.35163e-05	3.15974e-05	-0.000744119	-0.01114	-0.01177	-0.01191	-0.0124	-0.01851	-0.000414443	-0.000312756	-0.01331
	580	6.05552e-05	2.30453e-05	-0.000828625	-0.01175	-0.0123	-0.01241	-0.01295	-0.01887	-0.000475191	-0.000358166	-0.01387
	580.5	7.29733e-05	1.60001e-06	-0.000897419	-0.01242	-0.01284	-0.01284	-0.01342	-0.01943	-0.000574255	-0.000464028	-0.01447
	581	8.05669e-05	-2.90988e-05	-0.000962012	-0.01312	-0.01339	-0.01345	-0.01405	-0.02022	-0.00060095	-0.000556778	-0.01513
	581.5	8.36544e-05	-5.23673e-05	-0.00106	-0.01381	-0.01403	-0.01404	-0.01462	-0.02084	-0.000682364	-0.000611711	-0.01584
	582	8.24209e-05	-8.69289e-05	-0.00111	-0.01455	-0.01462	-0.01493	-0.01503	-0.02147	-0.000739642	-0.000667377	-0.0166
	582.5	7.64275e-05	-0.000155307	-0.00117	-0.01542	-0.0154	-0.01567	-0.01626	-0.02231	-0.000866203	-0.000716811	-0.01748
	583	6.4553e-05	-0.000181135	-0.00128	-0.01635	-0.01617	-0.01651	-0.01702	-0.02312	-0.000965381	-0.000803509	-0.01846
	583.5	4.54586e-05	-0.00018035	-0.00142	-0.01736	-0.01705	-0.01737	-0.01775	-0.02447	-0.000953332	-0.000913071	-0.01947
	584	1.84371e-05	-0.000243896	-0.00148	-0.01827	-0.01795	-0.01841	-0.01883	-0.02593	-0.000994472	-0.00113	-0.02048
	584.5	-1.56671e-05	-0.000341223	-0.00155	-0.01931	-0.01907	-0.01946	-0.01994	-0.02747	-0.00116	-0.00119	-0.02149
	585	-5.38624e-05	-0.000370874	-0.00175	-0.02046	-0.02026	-0.02053	-0.02114	-0.02915	-0.00132	-0.00145	-0.0226
	585.5	-9.10536e-05	-0.000407833	-0.00192	-0.02171	-0.02159	-0.02179	-0.0223	-0.03088	-0.00151	-0.00159	-0.02382
	586	-0.000120845	-0.000426283	-0.00201	-0.02301	-0.02292	-0.02323	-0.02374	-0.03168	-0.00167	-0.00182	-0.02505
	586.5	-0.000136966	-0.000481255	-0.00222	-0.02451	-0.02447	-0.02478	-0.02525	-0.03233	-0.00184	-0.00213	-0.02638
	587	-0.000134942	-0.000582832	-0.0024	-0.02604	-0.02608	-0.02638	-0.02682	-0.0341	-0.00199	-0.00235	-0.02792
	587.5	-0.000113535	-0.000623344	-0.00258	-0.0276	-0.02769	-0.0281	-0.02845	-0.03634	-0.00213	-0.00258	-0.02971
	588	-7.54944e-05	-0.000705808	-0.00277	-0.02935	-0.02929	-0.02977	-0.03023	-0.0384	-0.00226	-0.00294	-0.03166
	588.5	-2.73722e-05	-0.000724933	-0.00289	-0.03114	-0.03114	-0.03158	-0.03201	-0.04009	-0.00234	-0.00309	-0.03384
	589	2.15924e-05	-0.000684126	-0.00309	-0.03309	-0.03328	-0.03358	-0.03392	-0.04183	-0.00229	-0.0032	-0.0363
	589.5	6.12161e-05	-0.000701137	-0.00333	-0.03507	-0.03545	-0.03547	-0.03631	-0.0445	-0.00239	-0.00348	-0.03898
	590	8.22841e-05	-0.00075455	-0.00364	-0.03734	-0.038	-0.03776	-0.03869	-0.04741	-0.00253	-0.00374	-0.04191
	590.5	7.81491e-05	-0.000694691	-0.00405	-0.03973	-0.04061	-0.0404	-0.04119	-0.04984	-0.00253	-0.00411	-0.0451
	591	4.56677e-05	-0.00073178	-0.00451	-0.04263	-0.04354	-0.04327	-0.04443	-0.05148	-0.00272	-0.00471	-0.04844
	591.5	-1.46224e-05	-0.000735698	-0.00485	-0.04591	-0.04665	-0.04659	-0.04741	-0.05478	-0.00289	-0.00496	-0.05184
	592	-9.89366e-05	-0.000776658	-0.00546	-0.04943	-0.05	-0.04996	-0.05108	-0.05849	-0.00299	-0.00551	-0.05533
	592.5	-0.000200964	-0.000952844	-0.00598	-0.05347	-0.05385	-0.05372	-0.05517	-0.06203	-0.00262	-0.00597	-0.05906
	593	-0.000312538	-0.00111	-0.00654	-0.05787	-0.0584	-0.05789	-0.05963	-0.06624	-0.00337	-0.00674	-0.06303
	593.5	-0.000424049	-0.00115	-0.00733	-0.06258	-0.0633	-0.0626	-0.06458	-0.07104	-0.00425	-0.00751	-0.06729
	594	-0.00052464	-0.00145	-0.00816	-0.06782	-0.06859	-0.06799	-0.06983	-0.07624	-0.00513	-0.00836	-0.07183
	594.5	-0.000602452	-0.00168	-0.00897	-0.07371	-0.07457	-0.07378	-0.07552	-0.08239	-0.00603	-0.00927	-0.07676
	595	-0.000645304	-0.00184	-0.00977	-0.07998	-0.08091	-0.07994	-0.08132	-0.08937	-0.00696	-0.01013	-0.0822
	595.5	-0.000642148	-0.00199	-0.01053	-0.08659	-0.08752	-0.08658	-0.08767	-0.09659	-0.00784	-0.01118	-0.08815
	596	-0.000585361	-0.00202	-0.01134	-0.0937	-0.09455	-0.09381	-0.09503	-0.1041	-0.00873	-0.01235	-0.09459
	596.5	-0.000473551	-0.00211	-0.01211	-0.10147	-0.10226	-0.10146	-0.10283	-0.1111	-0.00964	-0.01349	-0.10165
	597	-0.000314203	-0.00229	-0.01291	-0.10959	-0.11024	-0.10946	-0.11122	-0.11864	-0.01012	-0.01475	-0.10932
	597.5	-0.000125225	-0.00229	-0.01346	-0.11829	-0.11887	-0.11792	-0.11998	-0.12691	-0.01059	-0.01611	-0.11758
	598	6.54576e-05	-0.00228	-0.01443	-0.12747	-0.12781	-0.12734	-0.12922	-0.13484	-0.01101	-0.01745	-0.12642
	598.5	0.000222773	-0.00233	-0.01509	-0.13711	-0.13738	-0.13716	-0.13887	-0.14417	-0.01107	-0.0188	-0.13594
	599	0.000309732	-0.00221	-0.01602	-0.14739	-0.14749	-0.14756	-0.14914	-0.15436	-0.01111	-0.02024	-0.14618
	599.5	0.000294214	-0.00212	-0.01699	-0.15818	-0.15825	-0.1587	-0.16002	-0.16479	-0.01097	-0.02161	-0.15715
	600	0.000155923	-0.00207	-0.01803	-0.1698	-0.16977	-0.17041	-0.17166	-0.17653	-0.01088	-0.023	-0.16895
	600.5	-0.000108149	-0.00202	-0.01952	-0.18235	-0.18227	-0.18285	-0.18399	-0.18822	-0.01094	-0.0246	-0.18155
	601	-0.000481247	-0.00229	-0.02126	-0.19556	-0.19541	-0.19618	-0.19689	-0.20093	-0.01114	-0.02638	-0.19489
	601.5	-0.000928282	-0.00222	-0.02316	-0.20909	-0.20907	-0.21004	-0.21051	-0.21397	-0.01161	-0.02862	-0.20884
	602	-0.0014	-0.00232	-0.02496	-0.22349	-0.22345	-0.22478	-0.22492	-0.22808	-0.01208	-0.031	-0.22353
	602.5	-0.00185	-0.00248	-0.02666	-0.23841	-0.23844	-0.24011	-0.24003	-0.24238	-0.01259	-0.03327	-0.23893
	603	-0.00222	-0.00241	-0.02871	-0.25493	-0.25348	-0.25596	-0.25664	-0.25758	-0.0132	-0.03584	-0.255
	603.5	-0.00248	-0.00276	-0.03076	-0.27115	-0.26989	-0.27244	-0.27276	-0.27505	-0.01384	-0.03819	-0.27171
	604	-0.00261	-0.00277	-0.03268	-0.28747	-0.2873	-0.28934	-0.28963	-0.29228	-0.01417	-0.04059	-0.28893
	604.5	-0.00263	-0.00278	-0.03447	-0.30467	-0.30534	-0.30701	-0.30704	-0.30897	-0.01471	-0.04324	-0.30667
	605	-0.00254	-0.00314	-0.03622	-0.32226	-0.32413	-0.32535	-0.32477	-0.32808	-0.01626	-0.04605	-0.32484
	605.5	-0.00238	-0.00283	-0.03762	-0.3404	-0.34315	-0.34388	-0.34288	-0.34792	-0.01712	-0.04824	-0.34349
	606	-0.00219	-0.00251	-0.03923	-0.35934	-0.36265	-0.36229	-0.36167	-0.36801	-0.01793	-0.05086	-0.36259
	606.5	-0.00199	-0.00277	-0.04038	-0.37887	-0.38277	-0.38197	-0.38107	-0.38805	-0.01855	-0.05302	-0.38235
	607	-0.00179	-0.00243	-0.04164	-0.39883	-0.40301	-0.40169	-0.40101	-0.41102	-0.01926	-0.05533	-0.40277
	607.5	-0.0016	-0.00201	-0.04267	-0.41941	-0.42369	-0.42309	-0.42126	-0.43289	-0.02009	-0.05778	-0.42362
	608	-0.00139	-0.00216	-0.04346	-0.44033	-0.44455	-0.44455	-0.44189	-0.45355	-0.02056	-0.0602	-0.44472
	608.5	-0.00115	-0.00192	-0.04406	-0.46143	-0.46548	-0.46613	-0.46374	-0.47403	-0.02096	-0.06272	-0.46591
	609	-0.000855738	-0.00198	-0.0449	-0.48246	-0.48649	-0.48755	-0.48548	-0.49531	-0.02125	-0.06491	-0.48704
	609.5	-0.000491155	-0.00212	-0.04543	-0.50323	-0.50728	-0.5086	-0.50669	-0.51691	-0.02121	-0.06666	-0.50781
	610	-5.96466e-05	-0.00182	-0.04621	-0.52376	-0.5279	-0.52982	-0.52773	-0.53809	-0.02112	-0.06814	-0.52843
	610.5	0.000419316	-0.00186	-0.04613	-0.54403	-0.54812	-0.55005	-0.54824	-0.55926	-0.02051	-0.06944	-0.54856
	611	0.000909741	-0.00161	-0.04577	-0.56378	-0.56705	-0.56945	-0.56768	-0.57878	-0.0195	-0.06975	-0.56819
	611.5	0.00136	-0.00124	-0.04506	-0.58259	-0.58507	-0.58654	-0.58666	-0.59812	-0.01841	-0.06968	-0.58672
	612	0.00173	-0.000829432	-0.04465	-0.60078	-0.60232	-0.60529	-0.6046	-0.6167	-0.01777	-0.06952	-0.60397
	612.5	0.00197	0.000193417	-0.04431	-0.61729	-0.61802	-0.6223	-0.62085	-0.63259	-0.01682	-0.06854	-0.61996
	613	0.00204	0.000801977	-0.04335	-0.63267	-0.63286	-0.63816	-0.63593	-0.64706	-0.01563	-0.06753	-0.63466
	613.5	0.00195	0.00115	-0.0421	-0.64646	-0.64598	-0.65228	-0.64931	-0.66022	-0.01436	-0.06564	-0.64812
	614	0.00169	0.00138	-0.04075	-0.65928	-0.6569	-0.66447	-0.66013	-0.674	-0.01356	-0.06352	-0.66021
	614.5	0.00132	0.00104	-0.03895	-0.67012	-0.66562	-0.67514	-0.67199	-0.68568	-0.01267	-0.0607	-0.67091
	615	0.000872021	0.000866369	-0.03719	-0.67886	-0.67447	-0.68389	-0.68187	-0.69099	-0.01192	-0.0581	-0.67992
	615.5	0.000418685	0.000518911	-0.03525	-0.68455	-0.68233	-0.69043	-0.68852	-0.69485	-0.01115	-0.0549	-0.68691
	616	1.47879e-05	0.000163129	-0.03327	-0.6882	-0.68765	-0.69499	-0.69325	-0.69607	-0.01027	-0.05157	-0.69168
	616.5	-0.000293244	0.000346113	-0.03105	-0.68993	-0.68994	-0.69692	-0.69587	-0.69488	-0.00971	-0.04803	-0.69406
	617	-0.000478316	9.02755e-05	-0.02844	-0.68865	-0.68992	-0.69523	-0.69544	-0.69249	-0.0089	-0.04348	-0.69374
	617.5	-0.000536566	-8.47117e-05	-0.0254	-0.68479	-0.68587	-0.69034	-0.6924	-0.68623	-0.00809	-0.03892	-0.69032
	618	-0.000486763	0.00034345	-0.02224	-0.67781	-0.67825	-0.68271	-0.68549	-0.67746	-0.00674	-0.03414	-0.68392
	618.5	-0.000365179	0.000479734	-0.0184	-0.66715	-0.66806	-0.67304	-0.67557	-0.66586	-0.00479	-0.02892	-0.67427
	619	-0.000216831	0.000226675	-0.01403	-0.65355	-0.65409	-0.65923	-0.66312	-0.65279	-0.00308	-0.02328	-0.66113
	619.5	-8.48226e-05	0.000327557	-0.00966	-0.6367	-0.63649	-0.64345	-0.6459	-0.63421	-0.00219	-0.01755	-0.64372
	620	-9.63077e-09	-9.63077e-09	-0.00519	-0.61594	-0.6158	-0.62334	-0.62665	-0.6142	-0.000936655	-0.01141	-0.62275
	620.5	2.67011e-05	-0.000287005	-0.00104	-0.59227	-0.59204	-0.5999	-0.60412	-0.5905	0.000199874	-0.00512	-0.59826
	621	7.55104e-06	-0.000514955	0.00273	-0.56589	-0.5648	-0.57277	-0.57734	-0.56445	0.000872987	0.00124	-0.57048
	621.5	-2.43058e-05	-0.00149	0.00662	-0.53545	-0.5345	-0.54244	-0.54769	-0.53693	0.00209	0.00758	-0.53953
	622	-2.21995e-05	-0.00217	0.0105	-0.50242	-0.50065	-0.51017	-0.51449	-0.50527	0.00257	0.01351	-0.50542
	622.5	6.30245e-05	-0.00269	0.01457	-0.46672	-0.46357	-0.4741	-0.47855	-0.46981	0.00329	0.01997	-0.46841
	623	0.000270827	-0.00319	0.01847	-0.42773	-0.42361	-0.43544	-0.43965	-0.43181	0.00407	0.0267	-0.42875
	623.5	0.000620547	-0.00346	0.02162	-0.38627	-0.38148	-0.39353	-0.39847	-0.39148	0.00422	0.03274	-0.38673
	624	0.00111	-0.00416	0.02479	-0.34257	-0.33733	-0.35119	-0.35405	-0.34834	0.0049	0.03905	-0.34276
	624.5	0.00169	-0.00453	0.02831	-0.29688	-0.2911	-0.30474	-0.30704	-0.30376	0.00606	0.04516	-0.29709
	625	0.00233	-0.00475	0.03208	-0.25032	-0.24363	-0.25628	-0.25833	-0.25793	0.00735	0.05056	-0.24996
	625.5	0.00295	-0.00508	0.03584	-0.20226	-0.19412	-0.2069	-0.20865	-0.21025	0.00819	0.05662	-0.20175
	626	0.0035	-0.00521	0.03916	-0.1529	-0.14453	-0.15573	-0.15883	-0.16188	0.00854	0.06173	-0.15298
	626.5	0.00393	-0.0053	0.0422	-0.10271	-0.09506	-0.10491	-0.11009	-0.10939	0.00863	0.06662	-0.10395
	627	0.00422	-0.00547	0.04456	-0.05219	-0.04695	-0.05398	-0.05962	-0.05451	0.00899	0.07063	-0.05474
	627.5	0.00438	-0.00536	0.04604	-0.00197	0.00242	-0.00341	-0.0097	-0.00182	0.00881	0.07399	-0.00552
	628	0.00445	-0.00551	0.0471	0.04786	0.0516	0.04658	0.03986	0.04911	0.00834	0.07692	0.04303
	628.5	0.00445	-0.00554	0.04828	0.09654	0.10005	0.09627	0.0893	0.09877	0.00795	0.07962	0.09108
	629	0.00443	-0.0054	0.04893	0.14489	0.14718	0.14519	0.13818	0.14766	0.0077	0.0816	0.13839
	629.5	0.00443	-0.00516	0.04961	0.19176	0.1943	0.1922	0.18552	0.19564	0.00759	0.08284	0.18487
	630	0.00445	-0.00479	0.05009	0.23743	0.2392	0.23801	0.23204	0.24129	0.00809	0.08417	0.2304
	630.5	0.00448	-0.00432	0.05022	0.28121	0.28201	0.28216	0.27621	0.2853	0.00826	0.08481	0.27453
	631	0.00451	-0.00399	0.05069	0.32279	0.32435	0.32456	0.31877	0.32683	0.00799	0.0861	0.31692
	631.5	0.00449	-0.0036	0.05047	0.36278	0.36386	0.36433	0.36038	0.36458	0.00716	0.08672	0.35739
	632	0.00441	-0.00358	0.05009	0.40054	0.40052	0.40142	0.39788	0.39985	0.00707	0.08743	0.39562
	632.5	0.00425	-0.00407	0.04936	0.43528	0.43519	0.43673	0.43321	0.43424	0.00718	0.08799	0.43146
	633	0.004	-0.00433	0.04835	0.46656	0.46684	0.46827	0.46525	0.46519	0.00659	0.08798	0.46459
	633.5	0.00369	-0.00476	0.04718	0.49564	0.49573	0.49676	0.49402	0.49371	0.00634	0.08769	0.49467
	634	0.00335	-0.00527	0.04597	0.52184	0.52254	0.52196	0.52094	0.52109	0.00572	0.08721	0.52146
	634.5	0.00303	-0.00563	0.04442	0.54483	0.54483	0.54483	0.54483	0.54483	0.0054	0.08669	0.54483
	635	0.00277	-0.00629	0.04311	0.56487	0.56435	0.56416	0.56513	0.56487	0.00511	0.0859	0.56484
	635.5	0.00258	-0.00649	0.0421	0.5815	0.58095	0.58145	0.58308	0.58257	0.00521	0.08492	0.58156
	636	0.00249	-0.00654	0.04137	0.59472	0.59385	0.59565	0.59863	0.59687	0.00574	0.08394	0.595
	636.5	0.00247	-0.00656	0.04098	0.60465	0.6042	0.60709	0.61024	0.60858	0.00613	0.08273	0.6055
	637	0.00251	-0.0063	0.04071	0.61162	0.61238	0.61616	0.61883	0.61935	0.00673	0.08186	0.61316
	637.5	0.00257	-0.00604	0.04043	0.61636	0.61744	0.62171	0.62418	0.62775	0.00689	0.08106	0.61815
	638	0.00262	-0.00572	0.03993	0.61953	0.61946	0.62568	0.62743	0.63255	0.00717	0.0799	0.62065
	638.5	0.00264	-0.00511	0.03938	0.62027	0.6191	0.62548	0.6286	0.6356	0.00727	0.07736	0.62079
	639	0.00261	-0.0047	0.03884	0.61872	0.61692	0.62331	0.62656	0.63508	0.00772	0.07635	0.61878
	639.5	0.00252	-0.00444	0.03817	0.61446	0.61223	0.61954	0.62258	0.63293	0.00737	0.07558	0.61496
	640	0.00239	-0.00397	0.03734	0.60803	0.60592	0.61319	0.61685	0.62788	0.00721	0.07457	0.60941
	640.5	0.00224	-0.00396	0.03643	0.59984	0.59788	0.60468	0.60931	0.62019	0.00674	0.07296	0.60225
	641	0.00206	-0.00354	0.03504	0.5904	0.58828	0.59446	0.59959	0.61109	0.00624	0.07094	0.59345
	641.5	0.00188	-0.00339	0.03386	0.579	0.57728	0.5833	0.58835	0.59938	0.00578	0.06891	0.58309
	642	0.0017	-0.00337	0.03251	0.56647	0.56487	0.57125	0.57574	0.58363	0.00517	0.06658	0.57144
	642.5	0.00154	-0.00327	0.03124	0.55334	0.55199	0.5577	0.56239	0.57171	0.00441	0.0641	0.55868
	643	0.0014	-0.00321	0.03013	0.53964	0.53821	0.54334	0.54662	0.55821	0.00377	0.06191	0.54504
	643.5	0.00128	-0.00318	0.02873	0.52546	0.52312	0.52852	0.52987	0.54054	0.00307	0.05958	0.5306
	644	0.00119	-0.00305	0.02735	0.51059	0.50795	0.51328	0.51471	0.52511	0.00278	0.05728	0.51545
	644.5	0.00112	-0.00301	0.02612	0.49506	0.49237	0.49821	0.49958	0.5134	0.00248	0.05502	0.5
	645	0.00109	-0.00286	0.02493	0.47902	0.47654	0.48211	0.48447	0.49881	0.00195	0.05258	0.4843
	645.5	0.00109	-0.00272	0.02374	0.46367	0.46115	0.46632	0.46933	0.48335	0.00192	0.05028	0.4685
	646	0.00111	-0.00268	0.0227	0.44868	0.44537	0.44973	0.45489	0.46737	0.00189	0.04816	0.45274
	646.5	0.00114	-0.00239	0.0219	0.43308	0.4289	0.43326	0.44011	0.45139	0.00176	0.04606	0.4372
	647	0.00117	-0.00214	0.02126	0.4173	0.4132	0.41722	0.42448	0.43498	0.00173	0.0442	0.42181
	647.5	0.00118	-0.00201	0.02053	0.40165	0.39696	0.4015	0.40953	0.42167	0.00187	0.04222	0.40655
	648	0.00117	-0.00192	0.01971	0.38532	0.38094	0.38571	0.39498	0.40431	0.00187	0.04013	0.39123
	648.5	0.00113	-0.00186	0.01908	0.36973	0.36534	0.37047	0.38048	0.38798	0.00186	0.03802	0.37578
	649	0.00107	-0.00174	0.01826	0.3538	0.34984	0.35539	0.36465	0.37038	0.00182	0.03593	0.36022
	649.5	0.000987203	-0.00162	0.01752	0.33812	0.33363	0.33983	0.34949	0.35258	0.00167	0.03369	0.34468
	650	0.000898859	-0.00157	0.01682	0.32462	0.31788	0.32459	0.33449	0.33588	0.00153	0.03157	0.32929
	650.5	0.000814258	-0.00163	0.01608	0.31123	0.30386	0.30909	0.31969	0.3183	0.00137	0.02953	0.31412
	651	0.000739001	-0.00161	0.01529	0.29763	0.29082	0.29461	0.30478	0.30095	0.00127	0.02944	0.29908
	651.5	0.000672449	-0.00177	0.01467	0.28426	0.27763	0.2806	0.29004	0.28446	0.00104	0.02846	0.28415
	652	0.000608054	-0.00163	0.01399	0.27142	0.2655	0.26624	0.27553	0.2688	0.00082984	0.02707	0.26953
	652.5	0.000535884	-0.00173	0.01325	0.25888	0.25434	0.25281	0.26139	0.25038	0.000450232	0.02582	0.25537
	653	0.000446596	-0.00169	0.01251	0.24641	0.24191	0.23985	0.24751	0.23516	0.000346165	0.02453	0.24169
	653.5	0.000335634	-0.00164	0.01209	0.23428	0.22953	0.22755	0.234	0.22057	0.000156559	0.02328	0.22873
	654	0.000206257	-0.00154	0.01144	0.22269	0.21851	0.21576	0.22051	0.20739	-1.58481e-05	0.02201	0.21653
	654.5	7.03208e-05	-0.00155	0.01082	0.21126	0.20682	0.2044	0.2063	0.19889	2.06344e-05	0.02087	0.20505
	655	-5.36348e-05	-0.00155	0.01019	0.20008	0.19491	0.19376	0.19412	0.1875	-7.87251e-05	0.01987	0.19416
	655.5	-0.000144595	-0.00152	0.00965	0.18909	0.18335	0.18398	0.18402	0.17719	-0.000123525	0.01897	0.18385
	656	-0.000184505	-0.00137	0.00921	0.17809	0.17323	0.17431	0.17586	0.17229	-8.6637e-05	0.01788	0.17401
	656.5	-0.00016341	-0.00108	0.0088	0.16846	0.16336	0.16516	0.1667	0.16446	-0.000119742	0.01703	0.16474
	657	-8.28576e-05	-0.000872105	0.00845	0.15943	0.15423	0.15654	0.15774	0.15273	-5.06241e-05	0.01634	0.15618
	657.5	4.34684e-05	-0.000654571	0.00817	0.15088	0.14529	0.14803	0.14927	0.1436	6.73829e-05	0.0157	0.14818
	658	0.000192119	-0.000456584	0.00791	0.14266	0.13672	0.14018	0.14186	0.13571	5.3974e-05	0.01499	0.14061
	658.5	0.000334689	-0.00018802	0.00769	0.13503	0.12866	0.13261	0.13481	0.12869	8.1372e-05	0.01436	0.13321
	659	0.000443845	-2.73009e-05	0.00738	0.12708	0.12084	0.12541	0.12778	0.12117	0.000185362	0.01388	0.12585
	659.5	0.00049904	8.96733e-05	0.00698	0.11923	0.11329	0.11847	0.12105	0.11471	0.00026957	0.01325	0.11854
	660	0.000490539	0.000144376	0.00666	0.11131	0.10641	0.11184	0.11515	0.10424	0.000356881	0.01263	0.11124
	660.5	0.000420836	5.53045e-05	0.00629	0.10426	0.09945	0.10579	0.10868	0.09725	0.000369659	0.01201	0.10396
	661	0.000303306	-5.95094e-05	0.0059	0.09695	0.09319	0.09946	0.10082	0.08953	0.000331582	0.01145	0.09681
	661.5	0.0001586	-0.000162836	0.00554	0.09086	0.08716	0.093	0.09473	0.08388	0.0002532	0.01083	0.08992
	662	9.86631e-06	-0.000286725	0.00518	0.08641	0.08233	0.08705	0.089	0.07841	0.000173614	0.01025	0.08329
	662.5	-0.000121988	-0.000383142	0.00491	0.08135	0.07849	0.0814	0.08336	0.07363	0.000167958	0.00972	0.07699
	663	-0.000221874	-0.000413879	0.00467	0.07643	0.0739	0.07625	0.07801	0.06976	0.0001422	0.00923	0.07113
	663.5	-0.000282284	-0.000366715	0.0045	0.07128	0.06966	0.07175	0.07303	0.06348	9.90551e-05	0.00878	0.06577
	664	-0.000303133	-0.000311352	0.00434	0.0664	0.06585	0.06744	0.06834	0.05739	8.78943e-05	0.00832	0.06085
	664.5	-0.000290056	-0.000282542	0.00417	0.06217	0.06244	0.06309	0.06357	0.05128	9.44708e-05	0.00791	0.05676
	665	-0.000251897	-0.000207302	0.00397	0.05811	0.05802	0.05898	0.05899	0.04785	7.77475e-05	0.0074	0.05335
	665.5	-0.000198176	-0.000158408	0.00385	0.05433	0.05432	0.0553	0.05472	0.04355	4.50002e-05	0.00691	0.0503
	666	-0.000137181	-0.000111001	0.00368	0.05077	0.05105	0.05205	0.05067	0.03988	3.60341e-05	0.00665	0.04753
	666.5	-7.50134e-05	-6.16455e-05	0.00354	0.04734	0.04697	0.04884	0.0467	0.03718	7.21492e-05	0.00634	0.04485
	667	-1.55647e-05	2.52352e-05	0.00344	0.04428	0.04357	0.04541	0.04515	0.03593	4.14364e-05	0.00608	0.04229
	667.5	3.88556e-05	9.37377e-05	0.00324	0.04129	0.04081	0.04221	0.04205	0.03309	2.07436e-05	0.00577	0.03976
	668	8.66708e-05	9.72244e-05	0.00314	0.0388	0.03888	0.03901	0.03934	0.02903	-4.8328e-06	0.0054	0.03715
	668.5	0.000126347	0.000143414	0.00297	0.03731	0.03641	0.03654	0.03707	0.02283	8.00627e-06	0.00517	0.03447
	669	0.000156103	0.000179743	0.00281	0.03514	0.03433	0.03381	0.03448	0.0205	4.28842e-05	0.00491	0.0318
	669.5	0.000174054	0.000232641	0.00265	0.03317	0.03212	0.03132	0.03218	0.01808	9.12601e-05	0.00462	0.02924
	670	0.000178662	0.000231588	0.00245	0.03122	0.03008	0.0289	0.0302	0.01577	8.72363e-05	0.00433	0.02684
	670.5	0.000169253	0.000199525	0.00225	0.0294	0.02822	0.02632	0.02822	0.01367	0.000102971	0.0041	0.02461
	671	0.000146399	0.000136075	0.0021	0.02722	0.02646	0.02473	0.02598	0.01193	0.000129556	0.00387	0.02256
	671.5	0.000112013	8.00998e-05	0.00191	0.02516	0.02484	0.02329	0.02407	0.01078	0.000164697	0.00367	0.02066
	672	6.91514e-05	3.99313e-05	0.00181	0.0234	0.02337	0.02179	0.02243	0.01018	0.000192783	0.00342	0.01892
	672.5	2.16055e-05	3.9464e-05	0.00169	0.02192	0.02182	0.02035	0.02096	0.00956	0.000184444	0.00321	0.01754
	673	-2.6587e-05	-2.43691e-05	0.00159	0.02042	0.02037	0.01896	0.01952	0.00896	0.000129237	0.00301	0.01628
	673.5	-7.15798e-05	-3.21678e-05	0.00151	0.01906	0.01887	0.01795	0.01845	0.00918	0.000114052	0.00286	0.0151
	674	-0.00011004	-5.59479e-05	0.00142	0.01759	0.01776	0.01687	0.01751	0.0095	0.000149039	0.00274	0.01414
	674.5	-0.000139354	-5.45896e-05	0.00137	0.0164	0.01644	0.01599	0.0162	0.00957	0.00013749	0.00257	0.01328
	675	-0.000157762	-3.19119e-05	0.00133	0.01586	0.0152	0.01514	0.01499	0.00741	0.000120805	0.00241	0.01255
	675.5	-0.000164476	3.71325e-06	0.0013	0.01411	0.01402	0.01455	0.01382	0.00479	0.000103294	0.00225	0.01188
	676	-0.000159802	3.1164e-05	0.00125	0.01296	0.01293	0.01381	0.01287	0.00369	8.10825e-05	0.00215	0.01121
	676.5	-0.000145236	5.7681e-05	0.00123	0.01212	0.01198	0.01286	0.01186	0.0033	7.42158e-05	0.00204	0.01054
	677	-0.000123462	8.125e-05	0.00122	0.01114	0.01109	0.01214	0.01099	0.00197	6.9012e-05	0.00191	0.00994
	677.5	-9.8157e-05	0.000138543	0.00124	0.01031	0.01019	0.01142	0.01015	0.00146	7.29306e-05	0.00182	0.00943
	678	-7.35739e-05	0.000204134	0.00124	0.00957	0.00958	0.01072	0.00938	0.00115	0.0001082	0.00176	0.00887
	678.5	-5.39103e-05	0.000230414	0.00123	0.00886	0.00901	0.01006	0.00857	0.00116	0.000142107	0.00169	0.00824
	679	-4.25831e-05	0.00024875	0.0012	0.0083	0.0084	0.00925	0.0078	0.000778112	0.00015946	0.00163	0.00753
	679.5	-4.15698e-05	0.000272561	0.00112	0.00767	0.0079	0.00867	0.00687	-0.00122	9.84077e-05	0.00156	0.00674
	680	-5.09956e-05	0.000255657	0.00111	0.0069	0.00732	0.00823	0.00638	-0.00225	5.88252e-05	0.00149	0.00584
	680.5	-6.90933e-05	0.000252522	0.00103	0.00624	0.00694	0.00788	0.00612	-0.00277	5.81585e-05	0.00142	0.00498
	681	-9.25675e-05	0.000226926	0.00101	0.00559	0.00655	0.00715	0.00539	-0.00294	6.42246e-05	0.00133	0.00409
	681.5	-0.000117282	0.000218277	0.000988199	0.00508	0.00602	0.00673	0.00488	-0.0041	3.69037e-05	0.00126	0.0033
	682	-0.000139099	0.00021354	0.000943084	0.00459	0.0057	0.00632	0.00456	-0.00459	1.21351e-05	0.00118	0.00273
	682.5	-0.000154652	0.000206593	0.000906437	0.00422	0.00533	0.0059	0.00433	-0.00445	-2.22518e-05	0.00113	0.00223
	683	-0.000161874	0.00018513	0.000901762	0.00388	0.00489	0.00567	0.004	-0.00444	-4.33307e-05	0.00107	0.00179
	683.5	-0.000160159	0.000182384	0.000891857	0.0036	0.00459	0.00536	0.00384	-0.00453	-6.72092e-05	0.00104	0.00138
	684	-0.000150187	0.000183075	0.000865858	0.00347	0.00448	0.0049	0.00372	-0.00437	-6.88425e-05	0.00102	0.00107
	684.5	-0.000133492	0.000187935	0.000843728	0.00343	0.00405	0.00427	0.00373	-0.00533	-6.85472e-05	0.00102	0.000873506
	685	-0.000111965	0.000192116	0.000815262	0.00343	0.00365	0.00385	0.00366	-0.00571	-5.08192e-05	0.000989459	0.00076238
	685.5	-8.74361e-05	0.000182663	0.000793576	0.00346	0.00329	0.00361	0.00351	-0.00539	-2.1024e-05	0.000945549	0.000679014
	686	-6.14661e-05	0.000203595	0.000760743	0.00344	0.00303	0.00333	0.00324	-0.00514	2.13272e-05	0.000915886	0.000546132
	686.5	-3.53469e-05	0.000217922	0.000735599	0.00368	0.00258	0.00297	0.00309	-0.00507	1.92286e-05	0.000820683	0.000366231
	687	-1.02542e-05	0.000229625	0.000693451	0.00395	0.0023	0.00265	0.00283	-0.00481	3.62538e-05	0.00079871	0.000174827
	687.5	1.25788e-05	0.000255605	0.000649744	0.0031	0.00206	0.00254	0.00267	-0.00445	4.3801e-05	0.00077022	-9.31854e-05
	688	3.17888e-05	0.00026838	0.000609047	0.003	0.00183	0.00236	0.00269	-0.00519	8.21803e-05	0.000725055	-0.00054534
	688.5	4.59856e-05	0.000276896	0.00060716	0.0028	0.00166	0.00212	0.00239	-0.00516	0.000105686	0.000679943	-0.000912791
	689	5.4023e-05	0.000297648	0.000591401	0.00263	0.00153	0.00182	0.00216	-0.00578	0.000154788	0.000644495	-0.00129
	689.5	5.53478e-05	0.000294793	0.000567484	0.00243	0.00155	0.00158	0.00183	-0.00559	0.000158215	0.000620438	-0.00167
	690	5.02886e-05	0.000315764	0.00054582	0.00224	0.00134	0.00143	0.00149	-0.00605	0.000158363	0.000607673	-0.00199
	690.5	4.01512e-05	0.000312897	0.000516781	0.00216	0.00123	0.00135	0.00128	-0.006	0.000149652	0.000591042	-0.00238
	691	2.70431e-05	0.000303572	0.000486842	0.00214	0.00115	0.00119	0.00111	-0.00611	0.000118822	0.000573755	-0.00285
	691.5	1.34414e-05	0.000303051	0.000466275	0.00188	0.00109	0.00108	0.00101	-0.00656	9.78675e-05	0.000564732	-0.0033
	692	1.61029e-06	0.000301886	0.000452712	0.0017	0.0011	0.00102	0.000912226	-0.00705	0.000106959	0.000548338	-0.00366
	692.5	-6.96458e-06	0.000316502	0.000459439	0.00162	0.00118	0.000961661	0.000784637	-0.00723	0.000118328	0.000517229	-0.00406
	693	-1.19489e-05	0.000323336	0.000458269	0.00152	0.0012	0.000944004	0.000737942	-0.00714	0.000126331	0.000507217	-0.00449
	693.5	-1.42164e-05	0.00031227	0.000459596	0.0014	0.00122	0.00103	0.000741799	-0.00717	0.000110923	0.000499848	-0.00491
	694	-1.55585e-05	0.000314196	0.000441337	0.00131	0.00119	0.00105	0.0007608	-0.00703	0.000112348	0.000471742	-0.00536
	694.5	-1.81241e-05	0.000342058	0.000431062	0.00122	0.0011	0.000935005	0.00082522	-0.00707	7.75441e-05	0.000475744	-0.00578
	695	-2.37482e-05	0.00036864	0.00045113	0.0011	0.00103	0.000965512	0.000718543	-0.00697	8.72114e-05	0.000468223	-0.00612
	695.5	-3.33681e-05	0.000382772	0.00045918	0.00101	0.00105	0.000879689	0.000386719	-0.00694	0.000104077	0.000484119	-0.0064
	696	-4.66952e-05	0.000388483	0.000420382	0.000949081	0.000962319	0.00075922	0.000203145	-0.00692	0.000127922	0.000496991	-0.00653
	696.5	-6.22413e-05	0.00037114	0.00041657	0.000990388	0.000621746	0.000529679	-1.43075e-05	-0.00721	0.000132718	0.00048262	-0.00624
	697	-7.76871e-05	0.000357694	0.000406462	0.000987263	0.000488195	0.000532706	-0.000198323	-0.00644	0.000148372	0.000442057	-0.00581
	697.5	-9.04881e-05	0.000351489	0.00038006	0.000826673	0.000400009	0.00059243	-0.000195048	-0.00583	0.000168465	0.000408273	-0.00522
	698	-9.8545e-05	0.000340338	0.00036516	0.000628252	0.000315508	0.000580991	-0.0001834	-0.00564	0.000208233	0.00039092	-0.00437
	698.5	-0.000100754	0.000334653	0.000347772	0.000515951	0.000290855	0.000551715	-0.0004771	-0.00556	0.000236031	0.000376418	-0.00348
	699	-9.72906e-05	0.000326757	0.000328511	0.000442403	0.000325654	0.000583826	-0.000642613	-0.00589	0.000230639	0.000364997	-0.00262
	699.5	-8.95629e-05	0.000328959	0.000319229	0.00021945	0.000399982	0.000626459	-0.00078271	-0.0059	0.000253844	0.000357534	-0.00186
	700	-7.98537e-05	0.000341107	0.000329093	7.53259e-05	0.000335674	0.000693839	-0.00103	-0.00621	0.000276106	0.000339263	-0.00126
	700.5	-7.07561e-05	0.000341105	0.000338999	-0.000129607	0.000307826	0.000707363	-0.0013	-0.00636	0.00029193	0.000357888	-0.000975986
	701	-6.45503e-05	0.000362661	0.000344727	-0.000175668	0.000411318	0.000604791	-0.00145	-0.00632	0.000343334	0.000363519	-0.000912946
	701.5	-6.26722e-05	0.000363986	0.000376792	-0.000219208	0.000434705	0.000609028	-0.00167	-0.00622	0.000309539	0.00039606	-0.00105
	702	-6.53965e-05	0.000365955	0.000371987	-0.000199294	0.000280564	0.000801387	-0.00179	-0.00668	0.000287183	0.000408996	-0.00146
	702.5	-7.17941e-05	0.000354279	0.00034702	-0.000142103	0.000244393	0.000678464	-0.00164	-0.00637	0.00025608	0.000416695	-0.00205
	703	-7.99648e-05	0.000343178	0.00031708	-0.000204181	0.000239273	0.000492069	-0.00168	-0.00602	0.000237642	0.00036013	-0.00268
	703.5	-8.74822e-05	0.000343549	0.00029212	1.72634e-06	0.000353376	0.0004727	-0.00152	-0.0065	0.000234139	0.00031093	-0.00326
	704	-9.19538e-05	0.000335573	0.00027367	-0.000117512	0.000373524	0.000277681	-0.00134	-0.00639	0.00021595	0.000261991	-0.00377
	704.5	-9.15776e-05	0.000333448	0.000258893	-0.000193909	0.000443634	8.31173e-05	-0.00113	-0.00616	0.000209751	0.000217781	-0.00413
	705	-8.55826e-05	0.000347752	0.000244464	-0.00030997	0.0003487	-2.07019e-05	-0.000890356	-0.00632	0.000214075	0.000191074	-0.00451
	705.5	-7.44617e-05	0.000364155	0.000249274	-0.000444587	0.000246634	9.00244e-05	-0.000917292	-0.00641	0.000229638	0.000171166	-0.00462
	706	-5.99445e-05	0.000379228	0.000255821	-0.000551745	0.000200851	0.00017814	-0.000924834	-0.00636	0.000246448	0.000173509	-0.00451
	706.5	-4.47023e-05	0.000387066	0.000270823	-0.000607998	9.82011e-05	-4.01558e-05	-0.000912803	-0.00646	0.000267855	0.000158731	-0.00433
	707	-3.18302e-05	0.000388009	0.000279958	-0.000619292	9.72428e-06	0.000194938	-0.000567201	-0.00572	0.00029034	0.000156741	-0.0041
	707.5	-2.42031e-05	0.000381522	0.000286318	-0.000620972	-1.05379e-05	0.000178899	-0.000341055	-0.00529	0.000304677	0.000170468	-0.00391
	708	-2.38352e-05	0.000371092	0.000265779	-0.000566884	-4.03267e-05	-0.000142762	-0.000592163	-0.00521	0.000298068	0.000150917	-0.00374
	708.5	-3.13891e-05	0.000342147	0.0002366	-0.00050609	-6.92516e-05	-0.000526416	-0.000913327	-0.00514	0.000283789	0.000125154	-0.00368
	709	-4.59609e-05	0.000307338	0.000202488	-0.000434884	-9.36067e-05	-0.000968356	-0.0013	-0.00508	0.000265545	9.68841e-05	-0.00371
	709.5	-6.52132e-05	0.00027239	0.000169168	-0.000347542	-0.000107666	-0.00146	-0.00175	-0.00502	0.000249063	7.18341e-05	-0.00388
	710	-9.36521e-05	0.000243967	0.000143301	-0.000237401	-0.000104768	-0.002	-0.00225	-0.00495	0.000241003	5.66648e-05	-0.00438
	710.5	-0.000114152	0.000228187	0.000131008	-9.83402e-05	-7.87928e-05	-0.00258	-0.0028	-0.00487	0.000247486	5.74973e-05	-0.00503
	711	-0.000122673	0.000229092	0.00013633	7.36801e-05	-2.56991e-05	-0.0032	-0.00339	-0.00478	0.000272553	7.83719e-05	-0.00581
	711.5	-0.000118485	0.00024741	0.000159995	0.000279389	5.5242e-05	-0.00385	-0.00403	-0.00467	0.000316933	0.000120018	-0.00673
	712	-0.000104761	0.00027997	0.000198832	0.000515615	0.000160859	-0.00454	-0.00471	-0.00455	0.000377454	0.000179263	-0.0078
	712.5	-8.8329e-05	0.000319944	0.000246012	0.00077553	0.000284322	-0.00527	-0.00545	-0.00441	0.000447287	0.000249278	-0.00901
	713	-7.86116e-05	0.000357907	0.000292112	0.00105	0.000416209	-0.00606	-0.00625	-0.00429	0.00051701	0.000320642	-0.01037
	713.5	-8.59675e-05	0.000383503	0.000326775	0.00133	0.000546163	-0.00692	-0.00712	-0.00417	0.000576264	0.000382995	-0.01191
	--	--	--	--

## Sheet: Fig. 6A
	Wavelength	PL int	PL int	PL int	PL int	PL int	PL int
	nm	a.u.	a.u.	a.u.	a.u.	a.u.	a.u.
		s5391, 400, 5-5	17251, 400, 5-5	19321, 400, 5-5	s3181, 400, 5-5	st111, 400, 5-5	ST10, zad 400
	494	94.5133	67.7071	78.0498	129.538	127.365	--
	494.5	94.1361	67.2529	77.6142	129.335	127.562	--
	495	93.7662	66.8405	77.2288	129.193	127.792	--
	495.5	93.4	66.4679	76.8915	129.11	128.051	--
	496	93.0343	66.1331	76.5995	129.085	128.341	--
	496.5	92.6667	65.8331	76.3494	129.113	128.658	--
	497	92.2951	65.5648	76.1372	129.191	129.001	--
	497.5	91.9179	65.3245	75.9587	129.316	129.368	--
	498	91.5339	65.1086	75.8094	129.481	129.756	--
	498.5	91.1421	64.9132	75.6843	129.681	130.163	--
	499	90.7416	64.734	75.5787	129.912	130.585	--
	499.5	90.3318	64.5673	75.4878	130.167	131.019	--
	500	89.9123	64.4089	75.4067	130.44	131.461	--
	500.5	89.4831	64.2553	75.331	130.726	131.909	--
	501	89.044	64.1028	75.2563	131.019	132.359	--
	501.5	88.5959	63.9482	75.179	131.314	132.808	--
	502	88.1396	63.7886	75.0953	131.604	133.252	--
	502.5	87.677	63.6217	75.0024	131.886	133.689	--
	503	87.2104	63.4453	74.8976	132.155	134.115	--
	503.5	86.743	63.2578	74.7791	132.407	134.528	--
	504	86.2789	63.0581	74.6451	132.639	134.925	--
	504.5	85.8228	62.8455	74.4949	132.847	135.306	--
	505	85.3804	62.62	74.3278	133.03	135.667	--
	505.5	84.9579	62.3818	74.1439	133.185	136.008	--
	506	84.5617	62.1315	73.9436	133.312	136.327	--
	506.5	84.1987	61.8705	73.7279	133.411	136.623	--
	507	83.8756	61.6001	73.4978	133.48	136.897	--
	507.5	83.5986	61.3221	73.2551	133.522	137.148	--
	508	83.3733	61.0388	73.0015	133.536	137.376	--
	508.5	83.2042	60.7523	72.7392	133.525	137.581	--
	509	83.0946	60.4653	72.4703	133.491	137.765	--
	509.5	83.0461	60.1803	72.1971	133.435	137.927	--
	510	83.0585	59.9	71.9223	133.362	138.069	--
	510.5	83.1301	59.6271	71.6482	133.273	138.192	--
	511	83.2569	59.3642	71.3773	133.172	138.297	--
	511.5	83.4336	59.1138	71.1122	133.064	138.385	--
	512	83.653	58.8784	70.8551	132.95	138.458	--
	512.5	83.9068	58.66	70.6083	132.836	138.517	--
	513	84.1856	58.4606	70.3742	132.724	138.563	--
	513.5	84.4797	58.2819	70.1546	132.619	138.599	--
	514	84.7792	58.1254	69.9515	132.524	138.625	150.91
	514.5	85.0745	57.9921	69.7667	132.443	138.643	150.797
	515	85.3571	57.8829	69.6018	132.378	138.655	150.689
	515.5	85.6196	57.7981	69.4581	132.334	138.663	150.589
	516	85.8567	57.738	69.337	132.312	138.667	150.499
	516.5	86.0645	57.7024	69.2394	132.316	138.671	150.425
	517	86.2418	57.6908	69.1663	132.347	138.675	150.376
	517.5	86.3893	57.7025	69.1184	132.407	138.682	150.36
	518	86.51	57.7365	69.0962	132.497	138.694	150.389
	518.5	86.609	57.7915	69.1001	132.619	138.712	150.474
	519	86.6931	57.8662	69.1301	132.772	138.738	150.628
	519.5	86.7704	57.9588	69.1862	132.957	138.775	150.864
	520	86.8499	58.0677	69.2682	133.173	138.823	151.194
	520.5	86.9411	58.1909	69.3755	133.419	138.885	151.628
	521	87.0532	58.3265	69.5075	133.693	138.963	152.176
	521.5	87.1946	58.4723	69.6632	133.994	139.057	152.842
	522	87.3725	58.6265	69.8415	134.318	139.17	153.631
	522.5	87.5923	58.7869	70.041	134.662	139.302	154.54
	523	87.8573	58.9516	70.2601	135.024	139.453	155.564
	523.5	88.1686	59.1184	70.4969	135.399	139.624	156.695
	524	88.5245	59.2855	70.7493	135.783	139.814	157.918
	524.5	88.9209	59.4511	71.0151	136.172	140.024	159.217
	525	89.3511	59.6133	71.2916	136.56	140.252	160.57
	525.5	89.8065	59.7704	71.5761	136.942	140.495	161.953
	526	90.2764	59.9208	71.8657	137.314	140.752	163.34
	526.5	90.7489	60.0631	72.1571	137.67	141.021	164.704
	527	91.211	60.1956	72.4471	138.004	141.296	166.016
	527.5	91.6496	60.3172	72.7323	138.312	141.575	167.25
	528	92.0516	60.4264	73.0091	138.588	141.854	168.38
	528.5	92.405	60.5221	73.2738	138.828	142.126	169.381
	529	92.6988	60.603	73.5228	139.027	142.388	170.235
	529.5	92.9239	60.6681	73.7525	139.18	142.633	170.924
	530	93.0732	60.7162	73.9592	139.283	142.855	171.436
	530.5	93.1417	60.7464	74.1393	139.333	143.05	171.765
	531	93.127	60.7576	74.2894	139.328	143.21	171.908
	531.5	93.0289	60.7491	74.4064	139.264	143.331	171.867
	532	92.8494	60.7197	74.487	139.139	143.407	171.649
	532.5	92.5925	60.6689	74.5285	138.953	143.432	171.263
	533	92.264	60.5958	74.5285	138.704	143.403	170.724
	533.5	91.8706	60.4997	74.4847	138.393	143.315	170.047
	534	91.4203	60.3802	74.3954	138.021	143.165	169.25
	534.5	90.9211	60.2369	74.2592	137.588	142.951	168.351
	535	90.3814	60.0694	74.0751	137.096	142.671	167.369
	535.5	89.809	59.8778	73.8429	136.548	142.324	166.321
	536	89.2109	59.6622	73.5624	135.947	141.911	165.222
	536.5	88.5934	59.4229	73.2344	135.296	141.433	164.086
	537	87.9617	59.1605	72.8599	134.599	140.893	162.925
	537.5	87.3197	58.8759	72.4406	133.861	140.293	161.746
	538	86.6702	58.5702	71.9788	133.087	139.637	160.555
	538.5	86.0151	58.245	71.4771	132.281	138.931	159.355
	539	85.3553	57.902	70.939	131.448	138.181	158.148
	539.5	84.6913	57.5432	70.3681	130.595	137.392	156.931
	540	84.023	57.1711	69.7689	129.726	136.571	155.702
	540.5	83.3504	56.7885	69.146	128.848	135.725	154.458
	541	82.6739	56.3982	68.5046	127.964	134.863	153.195
	541.5	81.994	56.0036	67.8504	127.082	133.99	151.91
	542	81.3121	55.6081	67.1889	126.206	133.115	150.601
	542.5	80.6305	55.2154	66.5264	125.341	132.245	149.267
	543	79.952	54.8294	65.8691	124.492	131.386	147.91
	543.5	79.2807	54.4539	65.2232	123.663	130.544	146.533
	544	78.6213	54.0931	64.595	122.858	129.726	145.142
	544.5	77.9791	53.7508	63.9909	122.081	128.935	143.744
	545	77.3599	53.4309	63.4169	121.335	128.177	142.348
	545.5	76.7697	53.1371	62.8788	120.622	127.455	140.966
	546	76.2145	52.8731	62.3821	119.944	126.77	139.609
	546.5	75.6997	52.6419	61.9319	119.305	126.125	138.291
	547	75.2304	52.4466	61.5326	118.703	125.519	137.023
	547.5	74.8104	52.2895	61.1881	118.141	124.954	135.818
	548	74.4427	52.1728	60.9019	117.619	124.427	134.686
	548.5	74.1291	52.0979	60.6763	117.136	123.937	133.637
	549	73.87	52.0658	60.5132	116.692	123.481	132.677
	549.5	73.6644	52.0768	60.4134	116.285	123.057	131.811
	550	73.5104	52.1309	60.3772	115.914	122.661	131.041
	550.5	73.4047	52.2269	60.4036	115.577	122.289	130.367
	551	73.3431	52.3636	60.4909	115.272	121.937	129.785
	551.5	73.3208	52.5389	60.6368	114.996	121.602	129.289
	552	73.3327	52.75	60.8378	114.747	121.278	128.874
	552.5	73.3731	52.9938	61.0899	114.521	120.962	128.528
	553	73.4367	53.2665	61.3882	114.315	120.65	128.243
	553.5	73.5185	53.5639	61.7272	114.127	120.339	128.007
	554	73.6138	53.8815	62.1009	113.951	120.025	127.811
	554.5	73.7186	54.2143	62.5029	113.785	119.706	127.642
	555	73.8297	54.5573	62.9262	113.626	119.38	127.493
	555.5	73.9446	54.9051	63.3639	113.47	119.044	127.354
	556	74.0614	55.2525	63.8088	113.314	118.697	127.22
	556.5	74.1792	55.5941	64.2536	113.153	118.338	127.085
	557	74.2973	55.9246	64.6916	112.987	117.967	126.946
	557.5	74.4154	56.2391	65.1157	112.81	117.584	126.803
	558	74.5338	56.5329	65.5198	112.622	117.188	126.655
	558.5	74.6525	56.8015	65.8978	112.419	116.78	126.505
	559	74.7716	57.0412	66.2446	112.199	116.362	126.357
	559.5	74.8911	57.2484	66.5554	111.961	115.932	126.215
	560	75.0105	57.4203	66.8263	111.703	115.493	126.084
	560.5	75.1294	57.5547	67.0543	111.424	115.045	125.969
	561	75.2469	57.6498	67.2371	111.123	114.588	125.877
	561.5	75.362	57.7048	67.3732	110.799	114.124	125.811
	562	75.4736	57.7192	67.4621	110.452	113.652	125.778
	562.5	75.5808	57.6934	67.5041	110.083	113.174	125.781
	563	75.6828	57.6283	67.5002	109.691	112.688	125.823
	563.5	75.7795	57.5255	67.4522	109.277	112.196	125.907
	564	75.8712	57.387	67.3626	108.842	111.696	126.035
	564.5	75.9589	57.2154	67.2345	108.387	111.188	126.209
	565	76.0446	57.0137	67.0716	107.913	110.672	126.427
	565.5	76.1313	56.7854	66.8779	107.422	110.146	126.691
	566	76.2225	56.5342	66.6577	106.914	109.61	127.001
	566.5	76.3229	56.264	66.4157	106.392	109.062	127.354
	567	76.4375	55.9788	66.1564	105.856	108.504	127.752
	567.5	76.5718	55.6829	65.8845	105.309	107.932	128.193
	568	76.7314	55.3802	65.6045	104.752	107.348	128.677
	568.5	76.9216	55.075	65.3209	104.187	106.751	129.202
	569	77.1471	54.7709	65.0376	103.615	106.141	129.768
	569.5	77.4114	54.4717	64.7583	103.037	105.518	130.375
	570	77.7169	54.1807	64.4864	102.454	104.883	131.02
	570.5	78.0642	53.9009	64.2246	101.869	104.237	131.703
	571	78.4518	53.6349	63.9754	101.28	103.582	132.422
	571.5	78.8763	53.3849	63.7405	100.69	102.918	133.173
	572	79.332	53.1527	63.5213	100.099	102.249	133.953
	572.5	79.8109	52.9396	63.3186	99.5076	101.576	134.758
	573	80.3032	52.7464	63.1329	98.9158	100.901	135.581
	573.5	80.797	52.5735	62.964	98.3241	100.229	136.417
	574	81.2793	52.421	62.8116	97.7325	99.5606	137.256
	574.5	81.7359	52.2886	62.6749	97.1411	98.8995	138.092
	575	82.1522	52.1753	62.5529	96.5498	98.2483	138.914
	575.5	82.5137	52.0801	62.4444	95.9585	97.6095	139.712
	576	82.8067	52.0018	62.3481	95.3671	96.9857	140.476
	576.5	83.0186	51.9387	62.2625	94.7755	96.3788	141.196
	577	83.1387	51.8891	62.1863	94.1834	95.7908	141.862
	577.5	83.1587	51.8512	62.1179	93.5908	95.2229	142.463
	578	83.0729	51.8229	62.0562	92.9977	94.6761	142.991
	578.5	82.8784	51.8025	61.9998	92.404	94.1509	143.437
	579	82.5756	51.788	61.9477	91.8099	93.6472	143.794
	579.5	82.1678	51.7776	61.8992	91.2156	93.1646	144.057
	580	81.6615	51.7696	61.8533	90.6214	92.7019	144.221
	580.5	81.0656	51.7625	61.8097	90.0277	92.2578	144.283
	581	80.3917	51.755	61.7679	89.4352	91.8303	144.242
	581.5	79.6529	51.7459	61.7277	88.8444	91.4172	144.095
	582	78.8638	51.7344	61.689	88.2563	91.0158	143.846
	582.5	78.0396	51.7196	61.6516	87.6716	90.6234	143.493
	583	77.1958	51.7012	61.6158	87.0915	90.237	143.041
	583.5	76.3471	51.6789	61.5813	86.517	89.8536	142.492
	584	75.5074	51.6526	61.5483	85.9493	89.4702	141.849
	584.5	74.6889	51.6225	61.5166	85.3896	89.0837	141.116
	585	73.902	51.5889	61.486	84.8392	88.6916	140.297
	585.5	73.1548	51.5521	61.4563	84.2995	88.2912	139.396
	586	72.453	51.5127	61.4268	83.7716	87.8805	138.417
	586.5	71.8	51.4713	61.3969	83.2568	87.4576	137.363
	587	71.1969	51.4284	61.3659	82.7565	87.0212	136.24
	587.5	70.6425	51.3848	61.3325	82.2717	86.5704	135.051
	588	70.1341	51.3409	61.2957	81.8036	86.1046	133.8
	588.5	69.6671	51.2972	61.2542	81.3532	85.624	132.494
	589	69.2363	51.2542	61.2063	80.9213	85.129	131.138
	589.5	68.8357	51.2122	61.1505	80.5087	84.6205	129.736
	590	68.4592	51.1713	61.0853	80.1161	84.1	128.298
	590.5	68.101	51.1315	61.0089	79.7438	83.569	126.829
	591	67.756	51.0927	60.9198	79.3922	83.0294	125.338
	591.5	67.4201	51.0546	60.8163	79.0613	82.4836	123.834
	592	67.0902	51.0167	60.6973	78.7511	81.9339	122.326
	592.5	66.7648	50.9784	60.5614	78.4613	81.3826	120.825
	593	66.4435	50.9388	60.4077	78.1913	80.8322	119.34
	593.5	66.1272	50.8971	60.2354	77.9406	80.2852	117.881
	594	65.8179	50.8522	60.0442	77.7082	79.7436	116.458
	594.5	65.5185	50.8029	59.8337	77.4929	79.2096	115.08
	595	65.2323	50.7481	59.6044	77.2935	78.685	113.756
	595.5	64.963	50.6866	59.3565	77.1083	78.1712	112.493
	596	64.7141	50.6169	59.0911	76.9358	77.6693	111.297
	596.5	64.4886	50.5378	58.809	76.7739	77.1801	110.172
	597	64.2886	50.4481	58.5118	76.6205	76.7041	109.121
	597.5	64.1153	50.3466	58.201	76.4734	76.2412	108.146
	598	63.9685	50.232	57.8784	76.3301	75.791	107.246
	598.5	63.8467	50.1033	57.5459	76.188	75.3529	106.419
	599	63.7468	49.9596	57.2054	76.0445	74.9257	105.662
	599.5	63.6645	49.8	56.8591	75.8966	74.5083	104.97
	600	63.5941	49.6237	56.5088	75.7417	74.0988	104.337
	600.5	63.5289	49.4303	56.1566	75.5767	73.6957	103.759
	601	63.4614	49.2193	55.8041	75.3988	73.2969	103.227
	601.5	63.3835	48.9904	55.4531	75.2051	72.9004	102.735
	602	63.2872	48.7434	55.1047	74.9927	72.5042	102.278
	602.5	63.1647	48.4783	54.7602	74.759	72.1061	101.85
	603	63.0088	48.1952	54.4203	74.5014	71.7041	101.446
	603.5	62.8133	47.8943	54.0857	74.2175	71.2964	101.061
	604	62.5733	47.5761	53.7563	73.9051	70.8812	100.694
	604.5	62.2851	47.2409	53.4323	73.5624	70.4568	100.342
	605	61.9472	46.8893	53.1132	73.1878	70.0218	100.006
	605.5	61.5594	46.522	52.7984	72.7799	69.575	99.6849
	606	61.1234	46.1397	52.4871	72.3378	69.1154	99.3811
	606.5	60.6429	45.743	52.1781	71.8611	68.6422	99.0965
	607	60.1226	45.3331	51.8703	71.3495	68.1549	98.8338
	607.5	59.5691	44.9106	51.5624	70.8034	67.6532	98.5958
	608	58.9898	44.4767	51.253	70.2236	67.1369	98.3851
	608.5	58.3929	44.0323	50.9407	69.611	66.6061	98.2044
	609	57.7871	43.5786	50.6244	68.9674	66.0611	98.0554
	609.5	57.1814	43.1166	50.3027	68.2947	65.5021	97.9394
	610	56.5843	42.6476	49.9746	67.5952	64.9298	97.8564
	610.5	56.0039	42.1728	49.6392	66.8717	64.3447	97.8057
	611	55.4475	41.6935	49.2959	66.1272	63.7477	97.7853
	611.5	54.9213	41.2111	48.9443	65.3649	63.1394	97.7922
	612	54.4302	40.7269	48.584	64.5886	62.5209	97.8225
	612.5	53.9778	40.2425	48.2151	63.8017	61.8929	97.8711
	613	53.566	39.7593	47.8379	63.0083	61.2567	97.9325
	613.5	53.1956	39.279	47.4529	62.2121	60.6131	98.0005
	614	52.8655	38.803	47.0607	61.417	59.9633	98.0686
	614.5	52.5735	38.3332	46.6624	60.6269	59.3083	98.1303
	615	52.316	37.871	46.2588	59.8453	58.6496	98.1792
	615.5	52.0884	37.4183	45.8512	59.0759	57.9881	98.2095
	616	51.8851	36.9766	45.4407	58.3217	57.3254	98.2159
	616.5	51.7	36.5476	45.0286	57.5858	56.6626	98.194
	617	51.5261	36.1329	44.6161	56.8708	56.0014	98.1403
	617.5	51.3568	35.734	44.2044	56.1789	55.343	98.0527
	618	51.1849	35.3524	43.7946	55.512	54.6891	97.9299
	618.5	51.0036	34.9895	43.3877	54.8715	54.0413	97.772
	619	50.8067	34.6464	42.9846	54.2583	53.4012	97.58
	619.5	50.5883	34.3242	42.586	53.673	52.7704	97.3562
	620	50.3432	34.0238	42.1925	53.1159	52.1506	97.1037
	620.5	50.0672	33.746	41.8047	52.5866	51.5434	96.8263
	621	49.757	33.4912	41.4227	52.0845	50.9504	96.5286
	621.5	49.4104	33.2598	41.0467	51.6087	50.3731	96.2154
	622	49.0263	33.0518	40.6768	51.1578	49.8129	95.8917
	622.5	48.6046	32.8671	40.313	50.7304	49.2712	95.5625
	623	48.1465	32.7053	39.9552	50.3248	48.749	95.2326
	623.5	47.6543	32.5657	39.6034	49.939	48.2472	94.906
	624	47.1313	32.4476	39.2573	49.5712	47.7666	94.5866
	624.5	46.5819	32.3498	38.9171	49.2193	47.3076	94.277
	625	46.0115	32.2711	38.5828	48.8812	46.8704	93.9792
	625.5	45.4262	32.21	38.2546	48.5552	46.455	93.694
	626	44.8328	32.165	37.9326	48.2394	46.0609	93.4214
	626.5	44.2387	32.1342	37.6175	47.932	45.6876	93.1599
	627	43.6516	32.1158	37.3097	47.6317	45.334	92.9075
	627.5	43.0793	32.1078	37.0102	47.3372	44.9991	92.6608
	628	42.5298	32.1082	36.7197	47.0475	44.6813	92.4157
	628.5	42.0105	32.115	36.4394	46.7617	44.379	92.1674
	629	41.5288	32.126	36.1706	46.4794	44.0904	91.9103
	629.5	41.0909	32.1393	35.9145	46.2002	43.8136	91.6387
	630	40.7025	32.1528	35.6724	45.9241	43.5463	91.3467
	630.5	40.3681	32.1646	35.4459	45.6512	43.2865	91.0282
	631	40.091	32.1729	35.2362	45.3818	43.0321	90.6777
	631.5	39.8733	32.176	35.0446	45.1166	42.781	90.29
	632	39.7155	32.1723	34.8723	44.8559	42.5311	89.8607
	632.5	39.6166	32.1604	34.7202	44.6007	42.2808	89.3864
	633	39.5742	32.139	34.5892	44.3515	42.0282	88.8645
	633.5	39.5845	32.1069	34.4797	44.1091	41.772	88.2938
	634	39.6423	32.0633	34.3918	43.8742	41.5111	87.6745
	634.5	39.7411	32.0074	34.3256	43.6474	41.2445	87.008
	635	39.8734	31.9386	34.2803	43.4293	40.9718	86.297
	635.5	40.0311	31.8564	34.2552	43.2201	40.6925	85.5456
	636	40.2052	31.7606	34.2489	43.02	40.4069	84.7589
	636.5	40.3867	31.6512	34.26	42.8292	40.1153	83.9433
	637	40.5663	31.5282	34.2863	42.6474	39.8183	83.1057
	637.5	40.7353	31.3918	34.3257	42.4742	39.5168	82.2538
	638	40.8853	31.2425	34.3755	42.3092	39.2121	81.3956
	638.5	41.0088	31.0807	34.4331	42.1517	38.9055	80.5388
	639	41.0994	30.9072	34.4953	42.0006	38.5985	79.6914
	639.5	41.1519	30.7228	34.5593	41.8551	38.2927	78.8604
	640	41.1624	30.5283	34.6219	41.714	37.9899	78.0521
	640.5	41.1286	30.3249	34.6799	41.5761	37.6916	77.272
	641	41.0496	30.1137	34.7306	41.4402	37.3997	76.5241
	641.5	40.9263	29.8961	34.7711	41.3049	37.1157	75.811
	642	40.7605	29.6735	34.7989	41.1692	36.841	75.1341
	642.5	40.5558	29.4473	34.8116	41.0319	36.577	74.493
	643	40.3167	29.2193	34.8075	40.892	36.3247	73.8862
	643.5	40.0487	28.9911	34.7849	40.7486	36.0851	73.3106
	644	39.758	28.7645	34.7429	40.6009	35.8588	72.7619
	644.5	39.451	28.5414	34.6808	40.4484	35.6463	72.2349
	645	39.1346	28.3238	34.5984	40.2909	35.4476	71.7239
	645.5	38.8153	28.1135	34.4961	40.1283	35.2627	71.2223
	646	38.4994	27.9124	34.3747	39.9607	35.0913	70.7238
	646.5	38.1924	27.7227	34.2353	39.7884	34.9328	70.222
	647	37.8993	27.5462	34.0795	39.612	34.7865	69.711
	647.5	37.6237	27.3847	33.9093	39.4324	34.6514	69.1858
	648	37.3685	27.24	33.7269	39.2504	34.5266	68.6422
	648.5	37.1351	27.1137	33.5347	39.0672	34.411	68.0771
	649	36.9241	27.0073	33.3355	38.8839	34.3032	67.4888
	649.5	36.7347	26.9221	33.1319	38.702	34.2022	66.8768
	650	36.5651	26.8591	32.9268	38.5227	34.1067	66.2421
	650.5	36.4125	26.8192	32.7228	38.3474	34.0157	65.587
	651	36.2737	26.8028	32.5227	38.1773	33.9279	64.9146
	651.5	36.1444	26.8101	32.3289	38.0138	33.8426	64.2296
	652	36.0205	26.841	32.1436	37.8579	33.7588	63.5371
	652.5	35.8974	26.895	31.9688	37.7106	33.6759	62.8428
	653	35.7707	26.9714	31.8062	37.5727	33.5934	62.153
	653.5	35.6363	27.0689	31.6572	37.4447	33.511	61.4737
	654	35.4908	27.186	31.5225	37.3271	33.4285	60.8111
	654.5	35.3312	27.3209	31.4029	37.2199	33.3459	60.1706
	655	35.1555	27.4714	31.2986	37.1231	33.2634	59.5572
	655.5	34.9624	27.635	31.2094	37.0363	33.1813	58.9751
	656	34.7518	27.8091	31.1347	36.959	33.0999	58.4276
	656.5	34.5241	27.9907	31.0739	36.8903	33.0199	57.9169
	657	34.2812	28.1767	31.0258	36.8292	32.9417	57.4442
	657.5	34.0252	28.3641	30.989	36.7748	32.8662	57.0097
	658	33.7594	28.5494	30.9622	36.7255	32.7939	56.6129
	658.5	33.4873	28.7296	30.9437	36.6802	32.7255	56.252
	659	33.2129	28.9016	30.9317	36.6373	32.6617	55.9247
	659.5	32.9405	29.0621	30.9245	36.5954	32.603	55.6282
	660	32.6743	29.2086	30.9204	36.5531	32.5501	55.3592
	660.5	32.4182	29.3384	30.9179	36.5089	32.5033	55.114
	661	32.176	29.4493	30.9153	36.4615	32.463	54.889
	661.5	31.951	29.5392	30.9114	36.4099	32.4294	54.6805
	662	31.7456	29.6068	30.9049	36.353	32.4026	54.485
	662.5	31.5617	29.6508	30.8949	36.2899	32.3826	54.2993
	663	31.4005	29.6706	30.8807	36.22	32.3693	54.1205
	663.5	31.2624	29.6659	30.8619	36.1429	32.3624	53.9462
	664	31.1469	29.6368	30.8382	36.0584	32.3615	53.7744
	664.5	31.0529	29.5839	30.8095	35.9665	32.3662	53.6035
	665	30.9788	29.5083	30.7762	35.8675	32.3759	53.4323
	665.5	30.9223	29.4113	30.7386	35.7618	32.3899	53.2601
	666	30.8808	29.2945	30.6974	35.65	32.4076	53.0865
	666.5	30.8516	29.16	30.6532	35.5329	32.4282	52.9115
	667	30.8316	29.0099	30.607	35.4114	32.451	52.7352
	667.5	30.818	28.8466	30.5596	35.2865	32.4751	52.558
	668	30.8082	28.6725	30.5119	35.1594	32.4998	52.3804
	668.5	30.7996	28.4902	30.465	35.0311	32.5244	52.2029
	669	30.7903	28.3022	30.4196	34.9028	32.5481	52.0262
	669.5	30.7787	28.1108	30.3766	34.7756	32.5702	51.8509
	670	30.7634	27.9184	30.3367	34.6505	32.5902	51.6778
	670.5	30.7439	27.727	30.3004	34.5285	32.6075	51.5072
	671	30.7198	27.5385	30.268	34.4104	32.6216	51.3398
	671.5	30.6912	27.3545	30.24	34.2969	32.6321	51.1761
	672	30.6584	27.1763	30.2162	34.1886	32.6387	51.0165
	672.5	30.6219	27.0049	30.1965	34.0857	32.6411	50.8614
	673	30.5825	26.841	30.1806	33.9887	32.6391	50.7109
	673.5	30.5407	26.6851	30.1682	33.8974	32.6326	50.5654
	674	30.4972	26.5373	30.1584	33.8119	32.6216	50.4249
	674.5	30.4523	26.3974	30.1505	33.7318	32.6061	50.2894
	675	30.4061	26.2652	30.1439	33.657	32.5862	50.1589
	675.5	30.3585	26.1401	30.1374	33.5869	32.5618	50.0333
	676	30.3089	26.0215	30.1302	33.521	32.5333	49.9122
	676.5	30.2566	25.9087	30.1213	33.4589	32.5007	49.7954
	677	30.2005	25.8009	30.1099	33.4	32.4643	49.6823
	677.5	30.1392	25.6975	30.095	33.3438	32.4242	49.5725
	678	30.0713	25.5977	30.0761	33.2898	32.3805	49.4654
	678.5	29.9953	25.5012	30.0526	33.2378	32.3336	49.3603
	679	29.9095	25.4077	30.024	33.1874	32.2834	49.2565
	679.5	29.8128	25.3168	29.9901	33.1387	32.2301	49.1532
	680	29.7038	25.229	29.951	33.0916	32.1738	49.0496
	680.5	29.582	25.1444	29.9068	33.0463	32.1146	48.945
	681	29.447	25.0637	29.858	33.0033	32.0523	48.8385
	681.5	29.299	24.9878	29.8054	32.9631	31.987	48.7295
	682	29.1387	24.9178	29.7497	32.9264	31.9186	48.6171
	682.5	28.9676	24.8549	29.692	32.8941	31.8468	48.5006
	683	28.7875	24.8008	29.6336	32.867	31.7716	48.3792
	683.5	28.6009	24.7568	29.5758	32.8462	31.6925	48.2522
	684	28.4109	24.7247	29.5203	32.8327	31.6094	48.1188
	684.5	28.2208	24.7061	29.4684	32.8278	31.5221	47.9781
	685	28.0343	24.7025	29.4217	32.8323	31.43	47.8295
	685.5	27.8554	24.7154	29.382	32.8473	31.333	47.6718
	686	27.6881	24.7459	29.3505	32.8735	31.2308	47.5042
	686.5	27.5366	24.7949	29.3288	32.9117	31.123	47.3257
	687	27.4046	24.863	29.318	32.9622	31.0096	47.1353
	687.5	27.2958	24.9504	29.3191	33.0252	30.8903	46.9321
	688	27.2136	25.0569	29.3328	33.1005	30.7651	46.7153
	688.5	27.1608	25.1816	29.3597	33.1878	30.6341	46.4843
	689	27.1397	25.3234	29.3999	33.2861	30.4975	46.2385
	689.5	27.1522	25.4804	29.4532	33.3944	30.3556	45.9779
	690	27.1992	25.6505	29.5191	33.511	30.209	45.7029
	690.5	27.2813	25.8309	29.5968	33.6343	30.0583	45.4142
	691	27.3981	26.0184	29.6849	33.7618	29.9044	45.113
	691.5	27.5486	26.2095	29.782	33.8912	29.7485	44.8014
	692	27.7311	26.4004	29.8862	34.0196	29.5918	44.4817
	692.5	27.9433	26.5867	29.9953	34.1441	29.4358	44.1572
	693	28.182	26.7644	30.107	34.2615	29.2821	43.8312
	693.5	28.4433	26.9289	30.2185	34.3687	29.1326	43.508
	694	28.7228	27.076	30.3273	34.4624	28.9894	43.1919
	694.5	29.0156	27.2015	30.4306	34.5393	28.8545	42.8876
	695	29.316	27.3014	30.5254	34.5966	28.7302	42.5996
	695.5	29.618	27.3721	30.609	34.6313	28.6189	42.3323
	696	29.9151	27.4104	30.6788	34.6409	28.5229	42.0899
	696.5	30.2007	27.4137	30.7322	34.6233	28.4447	41.8758
	697	30.468	27.38	30.7672	34.5767	28.3865	41.6927
	697.5	30.71	27.3078	30.7817	34.5	28.3506	41.5423
	698	30.9202	27.1967	30.7743	34.3924	28.3391	41.4253
	698.5	31.0922	27.0465	30.7438	34.2539	28.3539	41.3411
	699	31.2203	26.8583	30.6896	34.0851	28.3968	41.288
	699.5	31.2996	26.6337	30.6113	33.887	28.4691	41.263
	700	31.3261	26.3749	30.5094	33.6615	28.5719	41.2622
	700.5	31.297	26.085	30.3846	33.4109	28.7061	41.2803
		--	--	--	--	--	41.3118
		--	--	--	--	--	41.3501
		--	--	--	--	--	41.3888
		--	--	--	--	--	41.4213
		--	--	--	--	--	41.4414
		--	--	--	--	--	41.4436
		--	--	--	--	--	41.4233
		--	--	--	--	--	41.3769
		--	--	--	--	--	41.3023
		--	--	--	--	--	41.1985
		--	--	--	--	--	41.0662
		--	--	--	--	--	40.9072
		--	--	--	--	--	40.7246
		--	--	--	--	--	40.5223
		--	--	--	--	--	40.3053
		--	--	--	--	--	40.0785
		--	--	--	--	--	39.8474
		--	--	--	--	--	39.617
		--	--	--	--	--	39.3918
		--	--	--	--	--	39.1757
		--	--	--	--	--	38.9714
		--	--	--	--	--	38.7808
		--	--	--	--	--	38.6045
		--	--	--	--	--	38.4422
		--	--	--	--	--	38.2927
		--	--	--	--	--	38.1542
		--	--	--	--	--	38.0246
		--	--	--	--	--	37.9018
		--	--	--	--	--
		--	--	--	--	--
		--	--	--	--	--
		--	--	--	--	--
		--	--	--	--	--
		--	--	--	--	--
		--	--	--	--	--
		--	--	--	--	--
		--	--	--	--	--
		--	--	--	--	--
		--	--	--	--	--
		--	--	--	--	--
		--	--	--	--	--
		--	--	--	--	--
		--	--	--	--	--
		--	--	--	--	--
		--	--	--	--	--
		--	--	--	--	--
		--	--	--	--	--
		--	--	--	--	--
		--	--	--	--	--
		--	--	--	--	--
		--	--	--	--	--
		--	--	--	--	--
		--	--	--	--	--
		--	--	--	--	--
		--	--	--	--	--
		--	--	--	--	--
		--	--	--	--	--
		--	--	--	--	--
		--	--	--	--	--
		--	--	--	--	--
		--	--	--	--	--
		--	--	--	--	--
		--	--	--	--	--
		--	--	--	--	--
		--	--	--	--	--
		--	--	--	--	--
		--	--	--	--	--
		--	--	--	--	--
		--	--	--	--	--
		--	--	--	--	--
		--	--	--	--	--
		--	--	--	--	--
		--	--	--	--	--
		--	--	--	--	--
		--	--	--	--	--
		--	--	--	--	--
		--	--	--	--	--
		--	--	--	--	--
		--	--	--	--	--
		--	--	--	--	--
		--	--	--	--	--
		--	--	--	--	--
		--	--	--	--	--
		--	--	--	--	--
		--	--	--	--	--
		--	--	--	--	--
		--	--	--	--	--
		--	--	--	--	--
		--	--	--	--	--
		--	--	--	--	--
		--	--	--	--	--
		--	--	--	--	--
		--	--	--	--	--
		--	--	--	--	--
		--	--	--	--	--
		--	--	--	--	--
		--	--	--	--	--
		--	--	--	--	--
		--	--	--	--	--
		--	--	--	--	--
		--	--	--	--	--
		--	--	--	--	--
		--	--	--	--	--
		--	--	--	--	--
		--	--	--	--	--
		--	--	--	--	--
		--	--	--	--	--
		--	--	--	--	--
		--	--	--	--	--
		--	--	--	--	--
		--	--	--	--	--
		--	--	--	--	--
		--	--	--	--	--
		--	--	--	--	--
		--	--	--	--	--
		--	--	--	--	--
		--	--	--	--	--
		--	--	--	--	--
		--	--	--	--	--
		--	--	--	--	--
		--	--	--	--	--
		--	--	--	--	--
		--	--	--	--	--
		--	--	--	--	--
		--	--	--	--	--
		--	--	--	--	--
		--	--	--	--	--
		--	--	--	--	--

## Sheet: Fig. 6B
	Wavelength	PL int	PL int	PL int	PL int	PL int	PL int
	nm	a.u.	a.u.	a.u.	a.u.	a.u.	a.u.
		St5, 440, 5-5	ST17, 440, 5-5	ST19, 440, 5-5	ST11, 440, 5-5	ST10 without QDs 440 5-5	ST33, 440, 5-5
	494	95.5207	70.8513	186.931	128.202	--	138.216
	494.5	95.436	70.6882	186.35	128.914	--	138.14
	495	95.2979	70.4885	185.599	129.776	--	138.074
	495.5	95.1043	70.2497	184.657	130.792	--	138.018
	496	94.8542	69.9703	183.509	131.959	--	137.97
	496.5	94.5475	69.6493	182.143	133.271	--	137.932
	497	94.1849	69.287	180.554	134.717	--	137.903
	497.5	93.7682	68.8842	178.741	136.278	--	137.884
	498	93.3	68.4431	176.709	137.936	--	137.874
	498.5	92.7838	67.9664	174.471	139.667	--	137.876
	499	92.2237	67.4577	172.043	141.446	--	137.89
	499.5	91.6248	66.9214	169.45	143.248	--	137.918
	500	90.9922	66.3625	166.72	145.046	--	137.962
	500.5	90.332	65.7863	163.884	146.819	--	138.024
	501	89.6499	65.1984	160.976	148.546	--	138.107
	501.5	88.9521	64.6046	158.031	150.208	--	138.211
	502	88.2447	64.0104	155.085	151.793	--	138.339
	502.5	87.5335	63.4213	152.171	153.29	--	138.491
	503	86.8239	62.8421	149.32	154.697	--	138.669
	503.5	86.1212	62.2774	146.559	156.011	--	138.873
	504	85.4298	61.7308	143.909	157.236	--	139.1
	504.5	84.7538	61.2053	141.386	158.378	--	139.351
	505	84.0965	60.703	139.002	159.446	--	139.623
	505.5	83.4607	60.2253	136.761	160.449	--	139.914
	506	82.8485	59.7725	134.661	161.399	--	140.22
	506.5	82.2616	59.3444	132.697	162.306	--	140.538
	507	81.7009	58.9399	130.857	163.179	--	140.864
	507.5	81.167	58.5574	129.128	164.026	--	141.196
	508	80.6602	58.1948	127.49	164.854	--	141.53
	508.5	80.1804	57.8495	125.927	165.665	--	141.863
	509	79.7273	57.519	124.417	166.461	--	142.194
	509.5	79.3008	57.2006	122.944	167.24	--	142.521
	510	78.9005	56.8918	121.488	167.998	--	142.844
	510.5	78.5262	56.5905	120.036	168.73	--	143.163
	511	78.1779	56.2948	118.576	169.43	--	143.479
	511.5	77.8557	56.0036	117.099	170.09	--	143.794
	512	77.5601	55.7162	115.601	170.705	--	144.111
	512.5	77.2916	55.4327	114.08	171.268	--	144.432
	513	77.0511	55.1538	112.54	171.774	--	144.759
	513.5	76.8393	54.881	110.985	172.222	--	145.097
	514	76.6575	54.6163	109.424	172.611	187.619	145.448
	514.5	76.5065	54.362	107.868	172.944	187.151	145.815
	515	76.3872	54.1213	106.327	173.225	186.653	146.198
	515.5	76.3004	53.8971	104.814	173.461	186.135	146.6
	516	76.2464	53.6928	103.34	173.663	185.609	147.019
	516.5	76.2251	53.5114	101.918	173.841	185.087	147.457
	517	76.2358	53.3558	100.556	174.008	184.585	147.91
	517.5	76.2771	53.2283	99.2632	174.175	184.12	148.377
	518	76.3472	53.1308	98.0441	174.357	183.707	148.853
	518.5	76.443	53.0641	96.9019	174.564	183.363	149.335
	519	76.5609	53.0283	95.837	174.807	183.104	149.816
	519.5	76.6965	53.0225	94.8472	175.092	182.942	150.291
	520	76.8443	53.0446	93.9275	175.426	182.888	150.754
	520.5	76.9984	53.0914	93.0711	175.81	182.949	151.198
	521	77.1519	53.1589	92.269	176.243	183.129	151.615
	521.5	77.2977	53.2418	91.511	176.719	183.425	151.998
	522	77.4281	53.3339	90.7859	177.231	183.831	152.338
	522.5	77.5351	53.4285	90.0822	177.767	184.334	152.629
	523	77.6108	53.5181	89.3882	178.313	184.917	152.863
	523.5	77.6475	53.5947	88.6932	178.852	185.56	153.031
	524	77.6377	53.6504	87.9874	179.367	186.235	153.127
	524.5	77.5746	53.6773	87.2626	179.837	186.913	153.142
	525	77.452	53.6674	86.5127	180.245	187.562	153.071
	525.5	77.2649	53.6138	85.7334	180.571	188.15	152.908
	526	77.0092	53.51	84.9231	180.797	188.644	152.648
	526.5	76.6823	53.3506	84.0823	180.908	189.01	152.286
	527	76.2827	53.1312	83.2142	180.89	189.221	151.819
	527.5	75.8106	52.8488	82.3239	180.734	189.251	151.247
	528	75.2674	52.5016	81.4186	180.432	189.078	150.57
	528.5	74.6563	52.0895	80.5072	179.98	188.687	149.791
	529	73.9817	51.6137	79.5996	179.381	188.069	148.913
	529.5	73.2495	51.0767	78.7065	178.636	187.222	147.943
	530	72.4666	50.4826	77.8385	177.755	186.148	146.889
	530.5	71.6414	49.8366	77.006	176.747	184.86	145.763
	531	70.7826	49.1451	76.2182	175.627	183.373	144.576
	531.5	69.9002	48.4154	75.4829	174.411	181.71	143.342
	532	69.0041	47.6553	74.8057	173.115	179.898	142.075
	532.5	68.1047	46.8734	74.19	171.761	177.966	140.793
	533	67.2124	46.0784	73.6364	170.367	175.949	139.51
	533.5	66.337	45.279	73.1427	168.952	173.879	138.242
	534	65.488	44.4837	72.704	167.537	171.793	137.004
	534.5	64.6741	43.7005	72.3127	166.138	169.722	135.808
	535	63.9031	42.937	71.9587	164.771	167.698	134.665
	535.5	63.1815	42.1996	71.6303	163.452	165.748	133.585
	536	62.5147	41.4941	71.3142	162.19	163.898	132.574
	536.5	61.9066	40.825	70.9963	160.995	162.166	131.634
	537	61.3598	40.1957	70.6627	159.872	160.566	130.766
	537.5	60.8753	39.6086	70.3	158.825	159.108	129.968
	538	60.4527	39.0645	69.8966	157.853	157.796	129.233
	538.5	60.0903	38.5637	69.4425	156.953	156.629	128.554
	539	59.7851	38.1048	68.9308	156.12	155.599	127.922
	539.5	59.5327	37.6859	68.3575	155.348	154.697	127.326
	540	59.3279	37.3042	67.7222	154.627	153.908	126.755
	540.5	59.1646	36.9561	67.0281	153.946	153.214	126.197
	541	59.0359	36.6376	66.2818	153.296	152.596	125.643
	541.5	58.9348	36.3443	65.4935	152.665	152.031	125.081
	542	58.8536	36.0719	64.6763	152.042	151.497	124.506
	542.5	58.7848	35.8158	63.8454	151.417	150.973	123.911
	543	58.7212	35.5716	63.0183	150.781	150.437	123.293
	543.5	58.6557	35.3356	62.213	150.125	149.87	122.652
	544	58.5818	35.104	61.4479	149.444	149.254	121.99
	544.5	58.4939	34.874	60.7409	148.733	148.576	121.311
	545	58.3868	34.643	60.1082	147.991	147.826	120.62
	545.5	58.2566	34.4094	59.5641	147.216	146.996	119.925
	546	58.1002	34.172	59.1201	146.41	146.083	119.234
	546.5	57.9153	33.9304	58.7845	145.576	145.091	118.556
	547	57.701	33.6846	58.562	144.719	144.023	117.899
	547.5	57.4571	33.4354	58.4537	143.844	142.888	117.27
	548	57.1843	33.1838	58.4572	142.957	141.7	116.675
	548.5	56.8843	32.9315	58.5662	142.064	140.473	116.117
	549	56.5596	32.68	58.7717	141.173	139.225	115.597
	549.5	56.2129	32.4314	59.0616	140.288	137.973	115.116
	550	55.8479	32.1875	59.4218	139.416	136.738	114.669
	550.5	55.4684	31.9502	59.8364	138.559	135.537	114.252
	551	55.0784	31.7212	60.2884	137.72	134.389	113.855
	551.5	54.682	31.5021	60.7607	136.9	133.308	113.471
	552	54.2832	31.2938	61.2358	136.099	132.309	113.089
	552.5	53.8858	31.0971	61.6974	135.316	131.4	112.697
	553	53.4935	30.9125	62.1296	134.547	130.588	112.284
	553.5	53.1092	30.7399	62.5183	133.788	129.876	111.841
	554	52.7358	30.5787	62.8509	133.035	129.262	111.359
	554.5	52.3752	30.4281	63.1167	132.284	128.741	110.829
	555	52.0292	30.287	63.3068	131.529	128.304	110.246
	555.5	51.6986	30.1539	63.4141	130.767	127.94	109.608
	556	51.3839	30.0273	63.4334	129.996	127.635	108.913
	556.5	51.0851	29.9055	63.3615	129.212	127.374	108.164
	557	50.8017	29.7867	63.1967	128.418	127.14	107.366
	557.5	50.5327	29.6693	62.939	127.613	126.919	106.525
	558	50.2768	29.5519	62.5896	126.801	126.695	105.65
	558.5	50.0326	29.4334	62.1516	125.988	126.454	104.751
	559	49.7983	29.3129	61.629	125.179	126.187	103.838
	559.5	49.5724	29.1901	61.0272	124.381	125.885	102.922
	560	49.3532	29.065	60.3529	123.602	125.543	102.016
	560.5	49.1392	28.9381	59.6138	122.85	125.16	101.13
	561	48.9292	28.8105	58.8185	122.132	124.736	100.272
	561.5	48.7221	28.6838	57.9768	121.454	124.277	99.4507
	562	48.5172	28.5598	57.0992	120.821	123.79	98.6727
	562.5	48.3142	28.4409	56.1966	120.236	123.282	97.9419
	563	48.1133	28.3298	55.2807	119.697	122.765	97.2606
	563.5	47.9149	28.2294	54.3628	119.204	122.249	96.6291
	564	47.7199	28.1429	53.4545	118.751	121.744	96.0457
	564.5	47.5293	28.0734	52.5668	118.33	121.262	95.5071
	565	47.3448	28.0239	51.7096	117.933	120.811	95.0086
	565.5	47.1679	27.9974	50.8918	117.546	120.397	94.5446
	566	47.0004	27.9965	50.1211	117.158	120.025	94.1087
	566.5	46.8444	28.0234	49.4031	116.755	119.699	93.6942
	567	46.7016	28.0799	48.7415	116.325	119.418	93.2947
	567.5	46.5738	28.1673	48.1382	115.854	119.18	92.9039
	568	46.4625	28.2862	47.5927	115.333	118.983	92.5166
	568.5	46.3691	28.4365	47.1027	114.754	118.821	92.1284
	569	46.2945	28.6175	46.6639	114.112	118.687	91.7361
	569.5	46.2393	28.8279	46.2703	113.405	118.577	91.3376
	570	46.2035	29.0655	45.9148	112.634	118.482	90.9325
	570.5	46.1869	29.3279	45.5892	111.806	118.397	90.5213
	571	46.1885	29.6117	45.2849	110.929	118.317	90.1058
	571.5	46.2071	29.9133	44.9933	110.013	118.237	89.6887
	572	46.241	30.2288	44.7064	109.073	118.156	89.2737
	572.5	46.288	30.5538	44.4166	108.123	118.071	88.8647
	573	46.3458	30.8839	44.1181	107.18	117.984	88.466
	573.5	46.4116	31.2147	43.8062	106.259	117.895	88.0818
	574	46.4827	31.5418	43.478	105.374	117.806	87.7162
	574.5	46.5562	31.8612	43.1323	104.537	117.721	87.3726
	575	46.6292	32.169	42.7699	103.758	117.642	87.0537
	575.5	46.6992	32.462	42.3931	103.042	117.573	86.7615
	576	46.7637	32.7373	42.0055	102.394	117.516	86.4968
	576.5	46.8208	32.9926	41.6121	101.811	117.473	86.2598
	577	46.8688	33.2265	41.2186	101.288	117.445	86.0493
	577.5	46.9067	33.438	40.8312	100.819	117.433	85.8636
	578	46.934	33.6268	40.456	100.393	117.435	85.7002
	578.5	46.9508	33.7935	40.0991	99.9955	117.45	85.5558
	579	46.9578	33.939	39.7657	99.6145	117.477	85.4271
	579.5	46.9564	34.065	39.4603	99.2355	117.512	85.3104
	580	46.9485	34.1736	39.1861	98.8453	117.553	85.2022
	580.5	46.9365	34.2673	38.9451	98.432	117.598	85.0992
	581	46.9232	34.349	38.738	97.9862	117.645	84.9985
	581.5	46.9119	34.4217	38.5644	97.5015	117.694	84.8979
	582	46.9061	34.4885	38.4224	96.9746	117.746	84.7958
	582.5	46.9093	34.5524	38.3095	96.4057	117.8	84.6912
	583	46.9252	34.6164	38.2219	95.7986	117.861	84.5838
	583.5	46.9571	34.6832	38.1555	95.16	117.932	84.474
	584	47.0082	34.755	38.1058	94.4993	118.017	84.3623
	584.5	47.0812	34.8338	38.0682	93.828	118.12	84.2498
	585	47.1785	34.9211	38.0381	93.1584	118.247	84.1375
	585.5	47.3016	35.0176	38.0113	92.5033	118.401	84.0263
	586	47.4514	35.124	37.9841	91.8747	118.587	83.9169
	586.5	47.6281	35.2398	37.953	91.283	118.806	83.8093
	587	47.8311	35.3644	37.9156	90.7365	119.059	83.7032
	587.5	48.0587	35.4967	37.8698	90.2404	119.345	83.5973
	588	48.3088	35.6349	37.8144	89.7968	119.66	83.4899
	588.5	48.5782	35.777	37.7485	89.404	119.998	83.3783
	589	48.8631	35.9207	37.6722	89.0572	120.353	83.2596
	589.5	49.1592	36.0635	37.5857	88.748	120.715	83.1305
	590	49.4614	36.2026	37.4898	88.4655	121.073	82.9873
	590.5	49.7645	36.3355	37.3857	88.1966	121.417	82.8267
	591	50.0629	36.4595	37.275	87.9269	121.733	82.6457
	591.5	50.3507	36.5722	37.1594	87.6414	122.011	82.442
	592	50.6225	36.6713	37.0409	87.3256	122.238	82.2141
	592.5	50.8728	36.755	36.9216	86.9665	122.407	81.9615
	593	51.0963	36.8218	36.804	86.553	122.508	81.6851
	593.5	51.2885	36.8705	36.6905	86.0766	122.535	81.3869
	594	51.4453	36.9005	36.5836	85.5323	122.486	81.0699
	594.5	51.5634	36.9115	36.4858	84.9185	122.358	80.7382
	595	51.6402	36.9036	36.3996	84.2374	122.154	80.3968
	595.5	51.6739	36.8776	36.3272	83.4946	121.877	80.0509
	596	51.6638	36.8343	36.2706	82.699	121.533	79.706
	596.5	51.6099	36.775	36.2313	81.8622	121.127	79.3669
	597	51.513	36.7014	36.2106	80.998	120.67	79.038
	597.5	51.3749	36.615	36.2088	80.1215	120.169	78.7223
	598	51.1981	36.5178	36.2259	79.2487	119.634	78.4214
	598.5	50.9858	36.4118	36.2608	78.3952	119.072	78.1352
	599	50.7417	36.2988	36.3117	77.5758	118.491	77.8617
	599.5	50.47	36.1808	36.3762	76.8037	117.897	77.5968
	600	50.1752	36.0593	36.4511	76.0901	117.296	77.3348
	600.5	49.8622	35.9361	36.5326	75.4432	116.69	77.0681
	601	49.5357	35.8124	36.6165	74.8687	116.081	76.7883
	601.5	49.2005	35.6895	36.6984	74.369	115.47	76.4858
	602	48.8613	35.5681	36.7739	73.9437	114.854	76.1511
	602.5	48.5225	35.449	36.8391	73.5892	114.234	75.7748
	603	48.1881	35.3325	36.8903	73.2994	113.605	75.3486
	603.5	47.8617	35.219	36.925	73.066	112.965	74.8657
	604	47.5465	35.1086	36.9416	72.879	112.313	74.3215
	604.5	47.245	35.001	36.9396	72.7267	111.646	73.7136
	605	46.9595	34.8963	36.9201	72.5969	110.963	73.0425
	605.5	46.6914	34.7942	36.8854	72.477	110.265	72.3117
	606	46.4419	34.6947	36.8392	72.3545	109.553	71.5273
	606.5	46.2113	34.5975	36.7864	72.2175	108.831	70.6982
	607	46	34.5027	36.7329	72.0551	108.102	69.8356
	607.5	45.8075	34.4103	36.6853	71.8577	107.372	68.9524
	608	45.6334	34.3207	36.6508	71.6169	106.648	68.0627
	608.5	45.4768	34.2341	36.6363	71.3262	105.935	67.1813
	609	45.3366	34.1512	36.6488	70.9808	105.241	66.3225
	609.5	45.2117	34.0727	36.6943	70.5776	104.572	65.4999
	610	45.1008	33.9992	36.7779	70.1152	103.935	64.7255
	610.5	45.0026	33.9318	36.9034	69.594	103.333	64.0092
	611	44.9159	33.8714	37.073	69.0159	102.772	63.3584
	611.5	44.8394	33.819	37.2874	68.3844	102.253	62.7775
	612	44.772	33.7756	37.5455	67.7042	101.777	62.268
	612.5	44.7125	33.7418	37.8447	66.9813	101.343	61.8287
	613	44.66	33.7186	38.1808	66.2227	100.949	61.4556
	613.5	44.6133	33.7065	38.5488	65.4362	100.59	61.1422
	614	44.5717	33.7056	38.9425	64.6304	100.261	60.8803
	614.5	44.5341	33.716	39.3552	63.8141	99.9561	60.6604
	615	44.4996	33.7375	39.7803	62.9967	99.6681	60.4722
	615.5	44.4671	33.7694	40.2112	62.1875	99.3899	60.3053
	616	44.4356	33.8109	40.6422	61.3956	99.1141	60.15
	616.5	44.4038	33.8605	41.0682	60.63	98.8341	59.9972
	617	44.3704	33.9168	41.4854	59.8988	98.5438	59.8396
	617.5	44.334	33.9778	41.8913	59.2098	98.2381	59.6714
	618	44.2931	34.0413	42.2847	58.5695	97.913	59.4886
	618.5	44.2457	34.105	42.6656	57.9835	97.5661	59.2893
	619	44.1903	34.1664	43.035	57.4561	97.1961	59.073
	619.5	44.1248	34.2227	43.3951	56.9903	96.8032	58.8413
	620	44.0474	34.2713	43.7483	56.5876	96.389	58.5965
	620.5	43.9562	34.3094	44.0975	56.2481	95.9561	58.3423
	621	43.8494	34.3345	44.4453	55.9703	95.5082	58.0825
	621.5	43.7253	34.344	44.794	55.7512	95.0499	57.8211
	622	43.5824	34.3357	45.1447	55.5865	94.5861	57.562
	622.5	43.4195	34.3075	45.4977	55.4704	94.1221	57.3082
	623	43.2356	34.2577	45.8519	55.3961	93.6634	57.062
	623.5	43.0303	34.185	46.2047	55.3555	93.2153	56.8249
	624	42.8034	34.0882	46.5524	55.3399	92.7823	56.5971
	624.5	42.5552	33.9668	46.8895	55.3396	92.369	56.3781
	625	42.2865	33.8205	47.2099	55.3449	91.9787	56.1661
	625.5	41.9984	33.6496	47.5062	55.3454	91.6142	55.9591
	626	41.6927	33.4544	47.7709	55.3312	91.2774	55.7546
	626.5	41.3715	33.2361	47.9962	55.2923	90.9692	55.5496
	627	41.0372	32.9959	48.1749	55.2197	90.6898	55.3418
	627.5	40.6926	32.7354	48.3004	55.1048	90.4385	55.1287
	628	40.3407	32.4565	48.3674	54.9405	90.2137	54.9088
	628.5	39.9848	32.1615	48.3721	54.7208	90.0134	54.6809
	629	39.6282	31.8527	48.3126	54.4411	89.8348	54.4449
	629.5	39.2742	31.5327	48.1889	54.0988	89.675	54.2013
	630	38.9258	31.2042	48.003	53.693	89.5304	53.9511
	630.5	38.5862	30.87	47.759	53.2248	89.3976	53.6961
	631	38.258	30.533	47.4628	52.6972	89.2727	53.4383
	631.5	37.9435	30.1959	47.1217	52.1153	89.1521	53.1797
	632	37.6447	29.8615	46.7445	51.486	89.0321	52.9222
	632.5	37.3629	29.5326	46.3406	50.8177	88.9094	52.6676
	633	37.099	29.2118	45.9196	50.1205	88.7805	52.4166
	633.5	36.8534	28.9014	45.4913	49.4053	88.6423	52.1697
	634	36.6259	28.6038	45.0646	48.6839	88.4921	51.9263
	634.5	36.4156	28.321	44.6476	47.9684	88.3271	51.6849
	635	36.2214	28.0547	44.2468	47.2705	88.1448	51.4434
	635.5	36.0416	27.8065	43.8672	46.6015	87.9429	51.1988
	636	35.8739	27.5775	43.512	45.9714	87.7193	50.9476
	636.5	35.7161	27.3686	43.1824	45.3886	87.472	50.6858
	637	35.5654	27.1803	42.8779	44.8595	87.199	50.4095
	637.5	35.4189	27.0128	42.5963	44.3885	86.8985	50.1146
	638	35.2738	26.8658	42.3339	43.977	86.5687	49.7975
	638.5	35.1272	26.7386	42.0863	43.6243	86.208	49.4549
	639	34.9763	26.6303	41.8482	43.3269	85.8147	49.0843
	639.5	34.8186	26.5393	41.6141	43.0788	85.3872	48.6838
	640	34.6517	26.4639	41.3789	42.872	84.9242	48.2525
	640.5	34.4735	26.4018	41.1382	42.6964	84.4245	47.7903
	641	34.2823	26.3506	40.8887	42.5408	83.887	47.2977
	641.5	34.0769	26.3072	40.6285	42.3931	83.3109	46.776
	642	33.8563	26.2686	40.3573	42.2409	82.6957	46.2271
	642.5	33.6198	26.2313	40.0767	42.072	82.0411	45.6533
	643	33.3672	26.1919	39.7898	41.8751	81.3475	45.057
	643.5	33.0986	26.1466	39.5017	41.6403	80.6153	44.4408
	644	32.8143	26.0916	39.2188	41.3592	79.8453	43.8074
	644.5	32.515	26.0233	38.9485	41.0258	79.039	43.1592
	645	32.2013	25.938	38.699	40.636	78.198	42.4984
	645.5	31.8739	25.8324	38.4788	40.1884	77.3242	41.8271
	646	31.5339	25.7033	38.2962	39.6837	76.4201	41.147
	646.5	31.182	25.5477	38.1585	39.1246	75.4881	40.4598
	647	30.819	25.3634	38.0719	38.5161	74.531	39.767
	647.5	30.4456	25.1482	38.0411	37.8642	73.5519	39.0698
	648	30.0623	24.9009	38.0684	37.1767	72.5537	38.3699
	648.5	29.6696	24.6203	38.1542	36.4615	71.5397	37.6686
	649	29.2676	24.3064	38.2962	35.7273	70.5131	36.9676
	649.5	28.8565	23.9594	38.4898	34.9825	69.477	36.2688
	650	28.4363	23.5803	38.728	34.2351	68.4347	35.5741
	650.5	28.0068	23.1708	39.0018	33.4925	67.3893	34.8857
	651	27.568	22.7328	39.3005	32.7611	66.3441	34.2056
	651.5	27.1198	22.2694	39.6118	32.0464	65.3023	33.5362
	652	26.662	21.7838	39.9231	31.3527	64.2669	32.8794
	652.5	26.1948	21.2796	40.2212	30.6834	63.2412	32.2369
	653	25.7186	20.7611	40.4935	30.0409	62.2281	31.6104
	653.5	25.2338	20.2328	40.7282	29.4269	61.2308	31.0006
	654	24.7414	19.6992	40.9151	28.8424	60.2522	30.4082
	654.5	24.2424	19.1653	41.046	28.2877	59.2952	29.8329
	655	23.7385	18.6359	41.1149	27.763	58.3625	29.2742
	655.5	23.2315	18.1158	41.1185	27.2681	57.4567	28.7308
	656	22.7239	17.6096	41.0561	26.8026	56.58	28.2011
	656.5	22.2181	17.1217	40.9301	26.3657	55.7344	27.6832
	657	21.7171	16.6563	40.7451	25.9567	54.9215	27.1749
	657.5	21.224	16.2168	40.5083	25.5742	54.1425	26.6744
	658	20.7422	15.8067	40.229	25.2168	53.3982	26.1798
	658.5	20.2752	15.4284	39.918	24.8821	52.6888	25.6895
	659	19.8262	15.0842	39.5872	24.5675	52.0144	25.2029
	659.5	19.3986	14.7755	39.2488	24.2695	51.3743	24.7197
	660	18.9955	14.5032	38.9152	23.984	50.7678	24.2407
	660.5	18.6196	14.2675	38.5981	23.7063	50.1936	23.7672
	661	18.2734	14.068	38.3079	23.4311	49.6504	23.3016
	661.5	17.9586	13.9038	38.0534	23.1528	49.1369	22.847
	662	17.6767	13.7734	37.8416	22.8657	48.6515	22.4071
	662.5	17.4282	13.6747	37.677	22.5644	48.1928	21.9862
	663	17.2133	13.6052	37.5616	22.244	47.7598	21.5886
	663.5	17.0312	13.5619	37.4951	21.9005	47.3515	21.2189
	664	16.8808	13.5416	37.4746	21.5314	46.967	20.8816
	664.5	16.76	13.5408	37.495	21.1356	46.606	20.5806
	665	16.6665	13.5557	37.5492	20.7136	46.2682	20.3192
	665.5	16.597	13.5826	37.6284	20.2681	45.9536	20.1001
	666	16.5483	13.6176	37.7227	19.8038	45.6619	19.9248
	666.5	16.5165	13.6569	37.8213	19.327	45.3933	19.794
	667	16.4977	13.6969	37.9131	18.8457	45.1474	19.7072
	667.5	16.488	13.7342	37.9875	18.3694	44.9236	19.6628
	668	16.4833	13.7655	38.0342	17.908	44.721	19.6584
	668.5	16.4799	13.7881	38.0441	17.4722	44.5381	19.6903
	669	16.4745	13.7995	38.0095	17.0723	44.3728	19.7545
	669.5	16.4639	13.7977	37.9243	16.7175	44.2224	19.8458
	670	16.4457	13.7811	37.7844	16.416	44.0839	19.9591
	670.5	16.4179	13.7486	37.5876	16.1741	43.9535	20.0887
	671	16.3794	13.6997	37.3334	15.9957	43.8271	20.2289
	671.5	16.3295	13.6342	37.0235	15.8824	43.7007	20.374
	672	16.2683	13.5526	36.6611	15.8332	43.57	20.5187
	672.5	16.1965	13.4555	36.2508	15.8445	43.4312	20.6578
	673	16.1156	13.3443	35.7986	15.9104	43.2807	20.7869
	673.5	16.0275	13.2205	35.3109	16.023	43.1158	20.9018
	674	15.9344	13.0861	34.795	16.1729	42.9348	20.999
	674.5	15.839	12.9432	34.258	16.3497	42.7368	21.0756
	675	15.7444	12.7941	33.7069	16.5423	42.5224	21.1295
	675.5	15.6533	12.6412	33.1482	16.7402	42.293	21.159
	676	15.5689	12.487	32.5874	16.9334	42.0514	21.1629
	676.5	15.4938	12.334	32.029	17.1131	41.8015	21.1411
	677	15.4305	12.1844	31.4765	17.2723	41.548	21.0935
	677.5	15.381	12.0403	30.9321	17.4058	41.2962	21.0208
	678	15.3468	11.9037	30.3967	17.5105	41.0518	20.9244
	678.5	15.3288	11.7759	29.87	17.5852	40.8206	20.8058
	679	15.3274	11.6584	29.351	17.6307	40.608	20.6674
	679.5	15.342	11.5518	28.8376	17.6494	40.4188	20.5118
	680	15.3715	11.4567	28.3273	17.6448	40.257	20.3419
	680.5	15.4142	11.3731	27.8175	17.6214	40.1255	20.1612
	681	15.4678	11.3007	27.3053	17.5839	40.0258	19.9732
	681.5	15.5292	11.2387	26.7884	17.5369	39.958	19.7817
	682	15.5953	11.1861	26.2649	17.4848	39.9209	19.5907
	682.5	15.6622	11.1417	25.7339	17.431	39.9117	19.404
	683	15.7262	11.1039	25.1953	17.3779	39.9267	19.2253
	683.5	15.7834	11.0711	24.6499	17.327	39.9611	19.0582
	684	15.83	11.0416	24.0998	17.2786	40.0091	18.9057
	684.5	15.8624	11.0135	23.5481	17.2321	40.0647	18.7705
	685	15.8774	10.9853	22.9986	17.1863	40.1218	18.6545
	685.5	15.8723	10.9555	22.4559	17.1395	40.1744	18.5591
	686	15.8449	10.9228	21.925	17.09	40.2169	18.485
	686.5	15.7937	10.8862	21.4111	17.0362	40.2447	18.4318
	687	15.718	10.8451	20.9191	16.9772	40.2538	18.3989
	687.5	15.6178	10.7991	20.4536	16.9129	40.2414	18.3844
	688	15.4938	10.7485	20.0182	16.8439	40.2058	18.3862
	688.5	15.3476	10.6935	19.6159	16.772	40.1465	18.4014
	689	15.1813	10.6351	19.2482	16.6997	40.0639	18.4267
	689.5	14.9977	10.5745	18.9154	16.6303	39.9593	18.4586
	690	14.8003	10.513	18.6166	16.5674	39.8351	18.4936
	690.5	14.5928	10.4525	18.3496	16.5147	39.6938	18.5279
	691	14.3792	10.3947	18.1111	16.4755	39.5386	18.5584
	691.5	14.1639	10.3416	17.8969	16.4522	39.3727	18.582
	692	13.9511	10.2952	17.7023	16.4462	39.1994	18.5963
	692.5	13.745	10.2574	17.5222	16.4574	39.0217	18.5996
	693	13.5495	10.2297	17.352	16.4839	38.8426	18.5907
	693.5	13.3683	10.2137	17.187	16.5222	38.6645	18.5693
	694	13.2046	10.2104	17.0237	16.5669	38.4896	18.5358
	694.5	13.0611	10.2206	16.8594	16.6112	38.3195	18.4913
	695	12.9399	10.2447	16.6927	16.6474	38.1556	18.4377
	695.5	12.8426	10.2824	16.5237	16.6669	37.9993	18.3773
	696	12.7701	10.3332	16.3536	16.6611	37.8513	18.3128
	696.5	12.7226	10.396	16.185	16.622	37.7125	18.2472
	697	12.7001	10.4695	16.0216	16.5426	37.5838	18.1838
	697.5	12.7017	10.5518	15.8677	16.4181	37.4658	18.1255
	698	12.7264	10.6409	15.7284	16.2453	37.3595	18.0752
	698.5	12.7727	10.7344	15.6086	16.0242	37.2655	18.0354
	699	12.8387	10.8298	15.5129	15.7572	37.1849	18.008
	699.5	12.9227	10.9248	15.4453	15.4497	37.1183	17.9943
	700	13.0227	11.0168	15.4089	15.1095	37.0667	17.9951
	700.5	13.1368	11.1037	15.4052	14.7468	37.0305	18.0103
	701	13.2633	11.1835	15.4344	14.3734	37.0102	18.0389
	701.5	13.4005	11.2545	15.4951	14.0019	37.0057	18.0796
	702	13.5472	11.3154	15.5846	13.6455	37.017	18.1301
	702.5	13.7022	11.3653	15.6988	13.3163	37.0433	18.1877
	703	13.8648	11.4041	15.8322	13.0253	37.0835	18.2492
	703.5	14.0346	11.4317	15.9792	12.7815	37.1362	18.3113
	704	14.2111	11.4488	16.1334	12.5909	37.1998	18.3704
	704.5	14.3945	11.4562	16.2888	12.4568	37.2719	18.423
	705	14.5847	11.4555	16.4399	12.379	37.3502	18.4659
	705.5	14.782	11.4481	16.5822	12.3543	37.432	18.4961
	706	14.9864	11.4358	16.7121	12.3767	37.5146	18.5112
	706.5	15.1981	11.4206	16.8278	12.4378	37.5951	18.5093
	707	15.4166	11.4042	16.9288	12.5275	37.6703	18.4893
	707.5	15.6416	11.3883	17.0158	12.635	37.7372	18.4508
	708	15.8721	11.3742	17.0908	12.7496	37.7927	18.394
	708.5	16.1068	11.3629	17.1565	12.8618	37.8333	18.3199
	709	16.3438	11.3549	17.2157	12.964	37.8558	18.2301
	709.5	16.5808	11.3502	17.2709	13.0516	37.8567	18.1268
	710	16.8148	11.3482	17.3237	13.1232	37.8323	18.0124
	710.5	17.0424	11.3474	17.3739	13.1816	37.7789	17.8898
	711	17.2596	11.3461	17.4191	13.2333	37.6928	17.7621
	711.5	17.4622	11.3418	17.4541	13.2889	37.5703	17.6321
	712	17.6455	11.3312	17.471	13.3624	37.408	17.5027
	712.5	17.8046	11.311	17.4581	13.4709	37.2029	17.3765
	713	17.9345	11.2772	17.4009	13.6333	36.9526	17.2556
	713.5	18.0303	11.2257	17.2817	13.8696	36.6557	17.1419
	714	18.0872	11.1524	17.0806	14.1997	36.3122	17.0367
	714.5	18.1008	11.0529	16.7756	14.6421	35.9232	16.9409
				--	--		--
				--	--		--
				--	--		--
				--	--		--
				--	--		--
				--	--		--
				--	--		--
				--	--		--
				--	--		--
				--	--		--
				--	--		--
				--	--		--
				--	--		--
				--	--		--
				--	--		--
				--	--		--
				--	--		--
				--	--		--
				--	--		--
				--	--		--
				--	--		--
				--	--		--
				--	--		--
				--	--		--
				--	--		--
				--	--		--
				--	--		--
				--	--		--
				--	--		--
				--	--		--
				--	--		--
				--	--		--
				--	--		--
				--	--		--
				--	--		--
				--	--		--
				--	--		--
				--	--		--
				--	--		--
				--	--		--
				--	--		--
				--	--		--
				--	--		--
				--	--		--
				--	--		--
				--	--		--
				--	--		--
				--	--		--
				--	--		--
				--	--		--
				--	--		--
				--	--		--
				--	--		--
				--	--		--
				--	--		--
				--	--		--
				--	--		--
				--	--		--
				--	--		--
				--	--		--
					--		--
					--		--
					--		--
					--		--
					--		--
					--		--
					--		--
					--		--
					--		--
					--		--
					--		--
					--		--
					--		--
					--		--
					--		--
					--		--
					--		--
					--		--
					--		--
					--		--
					--		--
					--		--
					--		--
					--		--
					--		--
					--		--
					--		--
					--		--
					--		--
					--		--
					--		--
					--		--
					--		--
					--		--
					--		--
					--		--
					--		--
					--		--
					--		--
					--		--

## Sheet: Fig. 7
	Wavelength	PL int	PL int	PL int	PL int	PL int	PL int
	nm	a.u.	a.u.	a.u.	a.u.	a.u.	a.u.
		ST11, 400, 5-5	ST33, 400, 5-5	ST5, 400, 5-5	ST17, 400, 5-5	ST19, 400, 5-5	ST10 with QDs 400 5-5
	574	41.3346	98.4966	64.9394	41.3724	74.4101	113.8
	574.5	42.199	98.309	58.859	34.9186	75.1729	114.359
	575	43.2364	98.1866	53.8398	29.3063	75.9551	115.073
	575.5	44.3865	98.1295	49.882	24.5353	76.7566	115.342
	576	45.5857	98.1376	46.9855	20.6058	77.5775	115.773
	576.5	46.7727	98.2109	45.1502	17.5177	78.4177	116.165
	577	47.8933	98.3495	44.3763	15.2709	79.2773	116.685
	577.5	48.9055	98.5534	44.6636	13.8656	80.1563	117.261
	578	49.7828	98.8225	46.0123	13.3017	81.0546	117.756
	578.5	50.5166	99.1569	48.4222	13.5792	81.9723	118.046
	579	51.1173	99.5565	51.8935	14.6981	82.9094	118.41
	579.5	51.6132	100.021	56.426	16.6584	83.8658	118.778
	580	52.0489	99.1582	66.9993	19.5071	84.8416	119.388
	580.5	52.4812	98.9169	80.3574	21.7975	84.8267	120.006
	581	52.9752	99.0551	98.3035	25.3127	85.066	120.18
	581.5	53.5986	99.6194	99.7755	32.1774	86.0209	120.328
	582	54.4171	102.149	102.506	34.6446	87.6295	120.106
	582.5	55.4885	104.094	102.25	45.1801	88.2895	119.69
	583	56.8585	105.988	102.336	57.3751	90.2185	119.441
	583.5	58.5576	109.122	109.29	64.5714	91.4026	119.359
	584	60.5984	110.938	118.867	77.8129	92.9274	119.255
	584.5	62.9756	111.491	129.607	88.8936	93.7884	119.104
	585	65.6666	113.013	133.534	96.8132	96.5843	119.133
	585.5	68.6342	112.978	137.27	100.349	98.8092	119.48
	586	71.8307	116.316	143.871	112.816	99.9962	119.42
	586.5	75.2027	118.544	153.74	124.053	102.857	119.362
	587	78.6966	119.762	153.704	123.492	106.821	119.215
	587.5	82.2648	121.282	164.289	126.542	109.828	119.085
	588	85.8711	122.748	178.205	129.661	113.009	118.913
	588.5	89.4953	125.063	185.019	136.474	116.983	118.737
	589	93.1372	127.907	193.84	144.57	119.942	119.061
	589.5	96.819	132.216	205.771	152.944	124.722	119.148
	590	100.585	135.711	224.699	160.946	128.191	119.435
	590.5	104.503	138.96	240.231	170.264	131.532	119.275
	591	108.656	142.619	267.643	172.994	136.059	119.148
	591.5	113.144	146.509	275.157	181.034	140.107	119.423
	592	118.075	151.141	285.912	184.907	145.967	119.889
	592.5	123.559	156.524	284.837	194.79	150.838	120.197
	593	129.702	160.863	292.753	210.007	156.718	121.753
	593.5	136.601	167.345	313.471	229.427	164.585	122.894
	594	144.334	175.954	342.653	245.876	173.431	123.53
	594.5	152.961	184.778	371.154	268.555	182.811	124.687
	595	162.517	193.137	385.499	295.185	192.867	126.119
	595.5	173.016	203.19	404.436	318.554	202.415	127.601
	596	184.448	214.182	425.084	350.7	213.799	129.369
	596.5	196.784	225.274	453.301	385.706	226.272	131.068
	597	209.98	236.339	486.219	424.258	239.81	133.114
	597.5	223.984	247.539	528.254	460.79	253.417	134.859
	598	238.746	259.753	581.139	494.332	267.095	137.215
	598.5	254.221	273.797	630.093	532.712	282.342	140.202
	599	270.38	288.194	681.55	574.578	298.987	143.419
	599.5	287.216	305.026	735.482	612.8	315.83	146.856
	600	304.748	322.514	804.009	655.173	334.606	150.154
	600.5	323.029	340.631	876.844	705.248	355.194	154.171
	601	342.143	359.876	956.497	759.304	376.599	158.954
	601.5	362.206	379.731	1036.91	816.353	398.79	163.043
	602	383.363	401.151	1123.48	871.649	419.953	167.662
	602.5	405.782	422.839	1197.15	934.272	443.612	172.557
	603	429.646	446.287	1291.93	1002.53	468.036	177.546
	603.5	455.145	469.383	1385.22	1076.68	494.34	183.866
	604	482.463	493.501	1498.79	1159.45	522.842	190.441
	604.5	511.769	521.208	1618.38	1241.84	552.841	196.693
	605	543.207	550.434	1730.5	1322.95	585.219	203.294
	605.5	576.885	579.922	1824.99	1407.96	620.156	210.195
	606	612.866	611.396	1919.89	1497.02	655.228	217.487
	606.5	651.163	643.652	2031.19	1589.65	692.426	224.956
	607	691.736	675.551	2155.2	1689.15	729.962	232.326
	607.5	734.489	709.866	2287.12	1793.45	769.317	240.405
	608	779.272	745.191	2418.88	1893.73	810.306	248.745
	608.5	825.883	784.658	2559.53	1996.31	852.427	257.322
	609	874.079	823.959	2703.42	2098.62	894.391	266.083
	609.5	923.579	865.22	2845	2203.66	938.622	275.039
	610	974.074	907.357	3004.16	2312.77	984.739	284.174
	610.5	1025.24	949.325	3163.1	2423.67	1031.62	293.432
	611	1076.74	991.298	3322.5	2543.03	1079.49	302.956
	611.5	1128.25	1032.03	3476.21	2664.17	1128.37	312.288
	612	1179.44	1074.26	3642.62	2786.28	1176.58	322.122
	612.5	1230.01	1115.17	3801.03	2910.21	1224.53	331.947
	613	1279.68	1155.64	3958.99	3034.16	1270.43	341.452
	613.5	1328.18	1194.73	4109.04	3163.91	1314.96	350.731
	614	1375.27	1231.79	4255.43	3296.41	1359.78	360.169
	614.5	1420.75	1266.84	4399.34	3423.72	1404.56	369.022
	615	1464.41	1302.31	4539.41	3546.17	1449.18	377.783
	615.5	1506.08	1336.48	4665.21	3656.95	1494.44	386.125
	616	1545.58	1370.55	4778.7	3760.98	1539.65	394.315
	616.5	1582.76	1402.09	4884.45	3858.19	1583.4	401.78
	617	1617.44	1430.22	4985.53	3954.86	1623.37	409.072
	617.5	1649.48	1457.35	5083.64	4044.91	1661.78	415.612
	618	1678.69	1483.21	5175.07	4123.58	1696.3	421.682
	618.5	1704.9	1508.93	5249.83	4188.32	1729.08	427.495
	619	1727.92	1532.04	5317.1	4243.8	1755.99	433.083
	619.5	1747.59	1554.21	5370.03	4285.69	1780.1	437.959
	620	1763.72	1569.3	5424.9	4311.01	1800.5	441.901
	620.5	1776.14	1581.31	5474.03	4337.99	1815.07	445.117
	621	1784.69	1588.46	5504.7	4355.32	1823.71	447.483
	621.5	1789.26	1589.76	5516.49	4364.25	1829.22	449.754
	622	1789.75	1588.09	5518.81	4358.71	1828.51	451.072
	622.5	1786.09	1581.76	5513.16	4338.41	1822.44	451.072
	623	1778.3	1572.15	5490.33	4315.73	1812.96	450.634
	623.5	1766.4	1558.7	5446.91	4285.84	1800.88	449.411
	624	1750.49	1541.56	5402.64	4241.44	1785.2	447.891
	624.5	1730.74	1521.81	5348.14	4196.9	1764.46	445.836
	625	1707.34	1498.6	5276.49	4148.12	1741.77	442.344
	625.5	1680.55	1472.2	5194.18	4090.13	1716.35	438.286
	626	1650.68	1444.28	5103.7	4018.01	1689.3	433.933
	626.5	1618.04	1414.03	5008.79	3938.77	1659.7	429.097
	627	1583.02	1382.21	4911.27	3853.16	1629.51	423.785
	627.5	1545.98	1347.87	4797.61	3766.99	1597.61	417.856
	628	1507.29	1312.3	4678.75	3679.35	1563.9	411.891
	628.5	1467.34	1277.94	4562.98	3583.11	1528.09	405.061
	629	1426.46	1242.14	4431.86	3483.44	1489.19	397.788
	629.5	1385	1205.95	4295.39	3383.99	1449.57	390.434
	630	1343.23	1169.57	4159.25	3283.87	1409.05	382.522
	630.5	1301.41	1132.41	4016.31	3177.96	1368.11	374.659
	631	1259.74	1093.04	3882.51	3073.86	1324.52	366.295
	631.5	1218.37	1053.92	3729.44	2976.13	1281.21	357.569
	632	1177.44	1015.36	3575.08	2872.73	1236.75	348.835
	632.5	1136.99	977.195	3425.56	2760.91	1190.39	339.753
	633	1097.08	940.846	3278.32	2645.63	1145.02	330.549
	633.5	1057.71	904.793	3131.15	2531.18	1100.53	320.991
	634	1018.85	869.099	2983.65	2426.95	1056.18	311.727
	634.5	980.466	835.182	2855.45	2316.99	1014.63	302.612
	635	942.523	801.747	2737.07	2210.73	973.664	293.997
	635.5	904.972	769.795	2619.8	2113.35	935	285
	636	867.775	737.467	2499.18	2018.91	898.023	275.858
	636.5	830.908	704.955	2391.32	1927.06	860.033	267.17
	637	794.359	674.653	2294.84	1838.01	824.587	258.58
	637.5	758.138	645.407	2200.96	1752.02	788.112	249.94
	638	722.276	616.645	2107.88	1672.24	752.727	241.648
	638.5	686.822	587.572	2012.11	1593.49	718.265	233.417
	639	651.846	559.815	1933.89	1516.21	684.469	225.591
	639.5	617.433	532.849	1854.85	1443.95	652.947	217.736
	640	583.68	508.238	1770.85	1377.73	621.044	210.003
	640.5	550.694	485.09	1688.11	1315.32	591.316	202.723
	641	518.582	461.511	1609.31	1255.93	562.089	195.381
	641.5	487.453	438.463	1528	1199.33	534.961	188.33
	642	457.406	415.505	1444.53	1140.47	507.8	181.888
	642.5	428.531	395.658	1366.82	1083.75	482.228	175.497
	643	400.904	375.304	1295.62	1027.17	456.871	169.63
	643.5	374.583	355.925	1224.79	970	432.646	163.966
	644	349.608	337.391	1157.97	919.082	410.116	158.165
	644.5	325.999	318.22	1094.38	867.936	390.083	152.928
	645	303.756	299.23	1035.13	820.623	370.364	147.978
	645.5	282.859	280.942	985.285	771.713	350.345	143.105
	646	263.274	264.867	934.768	735.373	331.839	138.619
	646.5	244.951	249.13	883.622	693.874	315.196	134.464
	647	227.828	235.092	834.39	650.845	299.87	130.374
	647.5	211.835	220.773	789.936	614.14	283.165	126.447
	648	196.897	207.388	742.778	578.169	270.334	122.795
	648.5	182.94	195.983	693.837	538.316	255.524	119.24
	649	169.887	184.18	651.447	503.962	241.477	115.908
	649.5	157.671	173.815	612.791	462.378	228.23	112.058
	650	146.226	166.612	577.583	428.385	214.945	108.963
	650.5	135.499	159.174	537.559	403.727	202.653	106.134
	651	125.443	152.66	497.118	382.19	191.645	103.037
	651.5	116.022	146.19	460.53	362.283	182.299	100.167
	652	107.209	138.89	427.303	338.809	172.019	97.0409
	652.5	98.9863	133.944	394.45	315.226	164.231	94.3479
	653	91.3401	128.608	364.608	292.862	156.644	91.8529
	653.5	84.2629	125.287	339.752	281.758	151.55	89.3431
	654	77.7492	120.491	316.02	264.017	143.71	87.19
	654.5	71.7931	115.059	297.045	248.099	137.128	85.1844
	655	66.386	108.953	275.68	235.211	128.488	83.7178
	655.5	61.5144	103.563	254.656	224.229	121.443	81.9597
	656	57.1575	99.9155	236.319	211.566	114.782	80.2037
	656.5	53.2862	96.4614	226.64	203.826	109.726	77.9261
	657	49.862	93.3621	214.939	195.382	103.42	76.3824
	657.5	46.8363	88.5672	201.495	180.053	98.3128	74.9242
	658	44.1513	84.1766	192.064	165.948	94.6963	73.2983
	658.5	41.7411	80.0951	184.163	159.436	91.6838	71.8221
	659	39.5331	76.6037	174.068	148.847	89.3145	70.466
	659.5	37.4509	73.7286	165.422	134.535	84.3826	69.2128
	660	35.4168	70.7628	160.445	123.703	82.0444	68.0313
	660.5	33.3553	68.9355	152.479	116.624	78.1856	66.7457
	661	31.1962	66.8529	143.481	104.396	76.4258	65.7527
	661.5	28.8785	64.4585	134.027	97.5612	72.2807	64.8904
	662	26.3526	62.2046	127.175	90.0418	68.9	64.1036
	662.5	23.5836	61.1195	122.248	77.6652	67.8418	63.4002
	663	20.5534	59.7515	115.909	68.5131	65.1589	62.8533
	663.5	17.2614	59.2976	107.775	59.6776	63.0044	62.2397
	664	13.7253	57.3339	96.6048	53.4743	61.8814	61.7446
	664.5	9.98027	56.96	94.5316	50.9487	60.7202	61.0484
	665	6.07791	55.3038	95.5313	44.6224	59.6632	60.3567
	665.5	2.08339	53.0541	87.634	42.8694	59.0351	59.7336
	666	-1.92739	50.8067	78.1613	40.9297	54.4762	59.4903
	666.5	-5.87165	50.9217	68.9681	42.8546	51.102	58.9738
	667	-9.66384	50.6052	58.6449	41.8352	48.267	58.6121
	667.5	-13.22	48.8693	57.654	40.6463	46.5919	58.2223
	668	-16.462	47.7792	52.8479	38.7509	43.8738	57.7173
	668.5	-19.3216	45.8679	40.0218	39.6629	42.1622	57.3886
	669	-21.7437	44.8134	34.6572	37.4798	40.6788	57.1408
	669.5	-23.6892	43.8493	29.6213	35.0171	39.4237	56.6449
	670	-25.1365	42.9755	24.9139	32.275	38.3969	56.279
	670.5	-26.0828	42.1922	20.5352	29.2534	37.5984	55.7496
	671	-26.5432	41.4991	16.4851	25.9523	37.0282	55.5531
	671.5	-26.55	40.8965	12.7636	22.3718	36.6863	55.037
	672	-26.1501	40.3842	9.37067	18.5118	36.5726	54.4228
	672.5	-25.4022	39.9623	6.30639	14.3722	36.6873	53.8714
	673	-24.3736	39.6308	3.57072	9.95328	37.0302	53.5757
	673.5	-23.1354	39.3896	1.16367	5.25482	37.6014	53.2529
	674	-21.7596	39.2388	-0.91477	0.27689	38.4009	52.9913
	--	-20.3145	--	--	--	--	52.6882
	--	-18.8616	--	--	--	--	52.4418
	--	-17.4528	--	--	--	--	52.0319
	--	-16.1283	--	--	--	--	51.7971
	--	-14.9155	--	--	--	--	51.3315
	--	-13.8288	--	--	--	--	51.2321
	--	-12.8704	--	--	--	--	50.9285
	--	-12.0319	--	--	--	--	50.7969
	--	-11.2963	--	--	--	--	50.3705
	--	-10.6412	--	--	--	--	50.1661
	--	-10.0416	--	--	--	--	49.9895
	--	-9.47304	--	--	--	--	49.6082
	--	-8.91444	--	--	--	--	49.4386
	--	-8.35083	--	--	--	--	49.2392
	--	-7.77503	--	--	--	--	49.1415
	--	-7.18889	--	--	--	--	49.0352
	--	-6.60356	--	--	--	--	48.8153
	--	-6.039	--	--	--	--	48.7192
	--	-5.52262	--	--	--	--	48.5171
	--	-5.08727	--	--	--	--	48.3011
	--	-4.76863	--	--	--	--	48.1754
	--	-4.60234	--	--	--	--	47.8181
	--	-4.62097	--	--	--	--	47.6354
	--	-4.85109	--	--	--	--	47.5553
	--	-5.31074	--	--	--	--	47.542
	--	-6.00743	--	--	--	--	47.5412
	--	-6.93683	--	--	--	--	47.264
	--	-8.08232	--	--	--	--	47.0886
	--	-9.41539	--	--	--	--	46.8961
	--	-10.8969	--	--	--	--	46.709
	--	-12.4791	--	--	--	--	46.6512
	--	-14.1084	--	--	--	--	46.4755
	--	-15.7285	--	--	--	--	46.1954
	--	-17.2835	--	--	--	--	46.1402
	--	-18.722	--	--	--	--	45.7271
	--	-19.9996	--	--	--	--	45.5115
	--	-21.082	--	--	--	--	44.9944
	--	-21.947	--	--	--	--	44.6933
	--	-22.5859	--	--	--	--	44.5463
	--	-23.0039	--	--	--	--	44.5122
	--	-23.2196	--	--	--	--	44.2561
	--	-23.2637	--	--	--	--	44.1482
	--	-23.1769	--	--	--	--	43.9804
	--	-23.0071	--	--	--	--	43.8052
	--	-22.8062	--	--	--	--	43.833
	--	-22.6265	--	--	--	--	43.7658
	--	-22.5176	--	--	--	--	43.5972
	--	-22.5228	--	--	--	--	43.5031
	--	-22.6763	--	--	--	--	43.1286
	--	-23.0016	--	--	--	--	43.0162
	--	-23.5092	--	--	--	--	42.8704
	--	-24.1966	--	--	--	--	42.8258
	--	-25.0486	--	--	--	--	42.6198
	--	-26.0381	--	--	--	--	42.5378
	--	-27.1281	--	--	--	--	42.5801
	--	-28.2738	--	--	--	--	42.3475
	--	-29.4263	--	--	--	--	42.289
	--	-30.5348	--	--	--	--	42.0388
	--	-31.5503	--	--	--	--	42.1306
	--	-32.4283	--	--	--	--	42.4573
	--	-33.1315	--	--	--	--	42.3045
	--	-33.6322	--	--	--	--	42.1444
	--	-33.9132	--	--	--	--	41.9768
	--	-33.9691	--	--	--	--	41.8019
	--	-33.8064	--	--	--	--	41.6194
	--	-33.4422	--	--	--	--	41.4296
	--	-32.9041	--	--	--	--	41.2323
	--	-32.2272	--	--	--	--	41.0276
	--	-31.4529	--	--	--	--	40.8155
	--	-30.626	--	--	--	--	40.596
	--	-29.7926	--	--	--	--	40.369
	--	-28.9974	--	--	--	--	40.1346
	--	-28.2815	--	--	--	--	39.8928
	--	-27.681	--	--	--	--	39.6435
	--	-27.2249	--	--	--	--	39.3869
	--	-26.9347	--	--	--	--	39.1228
	--	-26.8236	--	--	--	--	38.8512
	--	-26.8964	--	--	--	--	38.5723
	--	-27.1502	--	--	--	--	38.2859
	--	-27.5748	--	--	--	--	37.9921
	--	-28.1537	--	--	--	--	37.6909
	--	-28.8654	--		--	--	--
	--	-29.6846	--		--	--	--
	--	-30.5835	--		--	--	--
	--	-31.5329	--		--	--	--
	--	-32.5033	--		--	--	--
	--	-33.4656	--		--	--	--
	--	-34.3921	--		--	--	--
	--	-35.2572	--		--	--	--
	--	-36.0371			--	--	--
	--	-36.7109			--	--	--
		-37.2605			--		--
		-37.6707			--		--
		-37.9292			--		--
		-38.0275			--		--
		-37.9602			--		--
		-37.7258			--		--
		-37.3268			--		--
		-36.7698			--		--
		-36.0657			--		--
		-35.2296			--		--
		-34.2809			--		--
		-33.2429			--		--
		-32.142			--		--
		-31.0073			--		--
		-29.8697			--		--
		-28.7603			--		--
		-27.7098			--		--
		-26.7465			--		--
		-25.8954			--		--
		-25.1767			--		--
		-24.6049			--		--
		-24.188			--		--
		-23.9268			--		--
		-23.815			--		--
		-23.8394			--		--
		-23.9806			--		--
		-24.214			--		--
		-24.5114			--		--
		-24.8422			--		--
		-25.1756			--		--
		-25.4822			--		--
		-25.7357			--		--
		-25.9145			--		--
		-26.0028			--		--
		-25.9916			--		--
		-25.8791			--		--
		-25.6702			--		--
		-25.3767			--		--
		-25.016			--		--
		-24.6095			--		--
		-24.1818			--		--
		-23.7582			--		--
		-23.3635			--		--
		-23.0203			--		--
		-22.7473			--		--
		-22.5585			--		--
		-22.4622			--		--
		-22.4609			--		--
		-22.5513			--		--
		-22.7249			--		--
		-22.9688			--		--
		-23.267			--		--
		-23.6017			--		--
		-23.9548			--		--
		-24.3092			--		--
		-24.6499			--		--
		-24.9651			--		--
		-25.2467			--		--
		-25.4903			--		--
		-25.6954			--		--
		-25.8641			--		--
		-26.0007			--		--
		-26.11			--		--
		-26.1964			--		--
		-26.2621			--		--
		-26.3057			--		--
		-26.3216			--		--
		-26.2989			--		--
		-26.2212			--		--
		-26.067			--		--
		-25.8102			--		--
		-25.4213			--		--
		-24.8693			--		--
		-24.1239			--		--
		-23.157			--		--
		-21.9459			--		--
		-20.4751			--		--
		-18.7379			--		--
		-16.7389			--		--
		-14.4939			--		--
		-12.0312			--		--
		-9.39044			--		--
		-6.62193			--		--
		-3.78467			--		--
		-0.94391			--		--
		1.83184			--		--
		4.47411			--		--
		6.91795			--		--
		9.10534			--		--
		10.9884			--		--

## Sheet: Fig. S1
	Wavelength	Optical density	Wavelength	FL int	FL int
	nm	o.d.u.	nm	a.u.	a.u.
		Absorbance		PL. 1d	PL. 2d
	173.85	0.00804	563	1.711	1.096
	174.45	0.02249	563.5	1.795	1.067
	175.05	0.03202	564	1.942	1.189
	175.65	0.03142	564.5	2.092	1.427
	176.26	0.03286	565	2.017	1.644
	176.86	0.02813	565.5	2.206	1.737
	177.46	0.02585	566	2.298	1.733
	178.06	0.02697	566.5	2.52	1.869
	178.66	0.02595	567	2.655	1.977
	179.26	0.02557	567.5	2.746	2.082
	179.87	0.02066	568	2.591	2.069
	180.47	0.02281	568.5	3.172	2.156
	181.07	0.0286	569	3.216	2.263
	181.67	0.0243	569.5	3.636	2.747
	182.27	0.0228	570	3.696	2.681
	182.87	0.02362	570.5	4.15	2.767
	183.48	0.02679	571	4.421	2.782
	184.08	0.03142	571.5	4.491	3.147
	184.68	0.03251	572	4.913	3.287
	185.28	0.03616	572.5	5.29	3.342
	185.88	0.03998	573	5.386	3.796
	186.48	0.04258	573.5	5.597	4.015
	187.08	0.04654	574	6.039	3.93
	187.69	0.04717	574.5	6.252	4.34
	188.29	0.04783	575	6.542	4.89
	188.89	0.04971	575.5	7.234	5.165
	189.49	0.05528	576	7.241	5.111
	190.09	0.06245	576.5	7.727	5.36
	190.69	0.06897	577	7.83	5.522
	191.29	0.07434	577.5	8.926	6.36
	191.89	0.08165	578	9.326	6.444
	192.5	0.09364	578.5	9.654	6.658
	193.1	0.09804	579	10.119	6.973
	193.7	0.10544	579.5	10.705	7.276
	194.3	0.11274	580	10.671	7.995
	194.9	0.11934	580.5	11.25	8.692
	195.5	0.12724	581	12.735	8.901
	196.1	0.12504	581.5	13.624	9.279
	196.7	0.12944	582	13.864	9.439
	197.3	0.13484	582.5	14.121	10.445
	197.9	0.13534	583	15.038	11.122
	198.5	0.13834	583.5	16.524	11.329
	199.1	0.14124	584	17.42	12.136
	199.71	0.14544	584.5	18.195	13.118
	200.31	0.15254	585	19.331	13.218
	200.91	0.15654	585.5	20.322	14.239
	201.51	0.15824	586	21.564	15.412
	202.11	0.16454	586.5	23.454	16.671
	202.71	0.16904	587	24.943	17.575
	203.31	0.17174	587.5	25.603	18.161
	203.91	0.17664	588	27.672	19.345
	204.51	0.18134	588.5	30.197	20.351
	205.11	0.18734	589	31.785	22.88
	205.71	0.18744	589.5	34.656	24.257
	206.31	0.19154	590	36.068	25.823
	206.91	0.19824	590.5	37.354	27.019
	207.51	0.20024	591	40.811	28.776
	208.11	0.20834	591.5	43.531	31.705
	208.71	0.21364	592	46.808	33.138
	209.31	0.22184	592.5	51.292	35.412
	209.91	0.23724	593	55.309	38.008
	210.51	0.24604	593.5	58.929	41.184
	211.11	0.25504	594	63.628	44.917
	211.71	0.26864	594.5	68.517	47.534
	212.31	0.27854	595	74.01	52.197
	212.91	0.28944	595.5	80.642	56.794
	213.51	0.29914	596	85.806	60.261
	214.11	0.30764	596.5	93.912	65.656
	214.71	0.31824	597	101.344	71.877
	215.31	0.32664	597.5	107.056	73.629
	215.91	0.33444	598	116.442	84.066
	216.51	0.34434	598.5	125.981	88.38
	217.11	0.34854	599	133.771	94.756
	217.71	0.35494	599.5	145.196	102.646
	218.31	0.36184	600	154.773	109.294
	218.91	0.36064	600.5	165.428	117.339
	219.51	0.36364	601	177.078	126.135
	220.11	0.36354	601.5	188.766	133.848
	220.71	0.36124	602	204.387	141.872
	221.31	0.36464	602.5	217.343	152.992
	221.91	0.36574	603	232.476	161.095
	222.51	0.36884	603.5	251.655	174.182
	223.11	0.37734	604	265.537	185.947
	223.71	0.38354	604.5	277.956	196.996
	224.31	0.39084	605	298.083	208.23
	224.91	0.40024	605.5	313.684	218.422
	225.51	0.40944	606	332.588	234.062
	226.1	0.41714	606.5	354.699	250.96
	226.7	0.42244	607	372.263	260.611
	227.3	0.42694	607.5	394.378	276.944
	227.9	0.43004	608	416.89	293.873
	228.5	0.43384	608.5	437.182	306.627
	229.1	0.43554	609	459.823	324.601
	229.7	0.43644	609.5	480.722	338.93
	230.3	0.43734	610	505.678	353.211
	230.9	0.43554	610.5	529.434	375.604
	231.5	0.43534	611	552.635	389.248
	232.1	0.43444	611.5	569.642	406.466
	232.69	0.43194	612	597.88	423.078
	233.29	0.42964	612.5	616.363	437.7
	233.89	0.42714	613	639.943	450.635
	234.49	0.42534	613.5	661.334	469.145
	235.09	0.42224	614	679.09	480.584
	235.69	0.42054	614.5	696.042	493.183
	236.29	0.41924	615	717.649	507.515
	236.89	0.41764	615.5	733.068	518.231
	237.49	0.41644	616	754.555	529.622
	238.08	0.41324	616.5	766.335	538.14
	238.68	0.41124	617	781.863	549.938
	239.28	0.41074	617.5	792.658	561.643
	239.88	0.40864	618	797.937	564.267
	240.48	0.40634	618.5	801.084	569.834
	241.08	0.40484	619	813.415	575.57
	241.68	0.40284	619.5	819.866	576.73
	242.27	0.40134	620	823.303	576.457
	242.87	0.39874	620.5	819.878	578.793
	243.47	0.39574	621	814.896	576.493
	244.07	0.39374	621.5	808.238	572.541
	244.67	0.39064	622	805.235	569.378
	245.27	0.38654	622.5	800.229	564.423
	245.86	0.38204	623	788.787	558.286
	246.46	0.37754	623.5	777.955	548.574
	247.06	0.37344	624	765.278	541.972
	247.66	0.36874	624.5	753.574	528.301
	248.26	0.36434	625	736.327	518.579
	248.86	0.36044	625.5	715.204	509.974
	249.45	0.35484	626	696.268	496.836
	250.05	0.34994	626.5	677.818	480.767
	250.65	0.34574	627	663.51	468.146
	251.25	0.34034	627.5	641.221	457.04
	251.85	0.33484	628	622.78	442.371
	252.44	0.32944	628.5	603.03	428.642
	253.04	0.32354	629	582.33	412.774
	253.64	0.31854	629.5	564.423	399.261
	254.24	0.31374	630	538.064	381.995
	254.83	0.30804	630.5	519.751	368.92
	255.43	0.30344	631	501.985	357.04
	256.03	0.29824	631.5	473.341	340.045
	256.63	0.29314	632	462.597	328.023
	257.23	0.28814	632.5	439.414	312.45
	257.82	0.28234	633	421.855	299.574
	258.42	0.27704	633.5	402.582	285.5
	259.02	0.27154	634	388.322	275.842
	259.62	0.26614	634.5	369.141	261.609
	260.21	0.26064	635	353.053	250.993
	260.81	0.25514	635.5	336.357	239.504
	261.41	0.25044	636	318.844	227.039
	262.01	0.24594	636.5	306.513	216.773
	262.6	0.24124	637	288.423	204.249
	263.2	0.23694	637.5	274.26	195.776
	263.8	0.23284	638	260.063	185.43
	264.39	0.22914	638.5	245.694	175.943
	264.99	0.22504	639	232.967	166.102
	265.59	0.22014	639.5	219.591	156.227
	266.19	0.21594	640	208.104	148.045
	266.78	0.21184	640.5	197.673	139.305
	267.38	0.20774	641	186.377	132.546
	267.98	0.20334	641.5	173.693	123.741
	268.57	0.19944	642	164.265	117.265
	269.17	0.19694	642.5	154.887	111.585
	269.77	0.19334	643	146.736	104.56
	270.37	0.18994	643.5	140.187	99.235
	270.96	0.18684	644	130.359	91.83
	271.56	0.18374	644.5	123.781	87.046
	272.16	0.18104	645	115.863	83.069
	272.75	0.17824	645.5	108.472	77.273
	273.35	0.17514	646	101.772	72.352
	273.95	0.17204	646.5	97.887	69.925
	274.54	0.16974	647	89.833	64.676
	275.14	0.16734	647.5	84.488	59.794
	275.74	0.16514	648	79.59	57.388
	276.33	0.16294	648.5	73.881	53.261
	276.93	0.16104	649	69.979	50.079
	277.53	0.15944	649.5	66.35	46.805
	278.12	0.15774	650	61.341	43.927
	278.72	0.15594	650.5	57.936	41.069
	279.32	0.15424	651	54.367	37.853
	279.91	0.15264	651.5	50.648	36.047
	280.51	0.15134	652	47.74	34.502
	281.1	0.14964	652.5	44.551	32.606
	281.7	0.14784	653	42.967	30.3
	282.3	0.14694	653.5	38.937	28.52
	282.89	0.14504	654	36.729	26.213
	283.49	0.14384	654.5	34.108	24.495
	284.09	0.14264	655	32.677	22.331
	284.68	0.14074	655.5	30.681	20.819
	285.28	0.13934	656	28.989	19.727
	285.87	0.13774	656.5	27.194	18.833
	286.47	0.13634	657	25.219	17.888
	287.07	0.13534	657.5	23.427	17.056
	287.66	0.13404	658	21.138	15.245
	288.26	0.13274	658.5	20.065	14.232
	288.85	0.13194	659	19.343	13.795
	289.45	0.13094	659.5	17.551	13.322
	290.05	0.12984	660	16.436	11.982
	290.64	0.12874	660.5	15.414	11.383
	291.24	0.12714	661	14.77	10.393
	291.83	0.12584	661.5	14.134	9.782
	292.43	0.12474	662	13.106	9.296
	293.03	0.12364	662.5	12.248	8.784
	293.62	0.12234	663	11.353	8.168
	294.22	0.12114	663.5	11.121	7.098
	294.81	0.12054	664	10.553	6.809
	295.41	0.12014	664.5	9.789	6.816
	296	0.11964	665	8.647	6.08
	296.6	0.11894	665.5	8.566	5.911
	297.19	0.11804	666	7.788	5.607
	297.79	0.11744	666.5	7.525	5.201
	298.38	0.11684	667	6.981	5.114
	298.98	0.11564	667.5	6.948	5.004
	299.58	0.11444	668	6.512	4.214
	300.17	0.11364	668.5	5.937	4.416
	300.77	0.11274	669	5.604	4.095
	301.36	0.11194	669.5	5.054	3.785
	301.96	0.11074	670	4.755	3.749
	302.55	0.10984	670.5	4.73	3.356
	303.15	0.10934	671	4.532	3.075
	303.74	0.10874	671.5	4.077	2.969
	304.34	0.10744	672	4.065	2.776
	304.93	0.10634	672.5	3.791	2.712
	305.53	0.10604	673	3.8	2.74
	306.12	0.10464	673.5	3.528	2.645
	306.72	0.10374	674	3.209	2.366
	307.31	0.10264	674.5	3.378	2.121
	307.91	0.10224	675	3.051	1.704
	308.5	0.10234	675.5	2.798	1.99
	309.1	0.10144	676	2.683	1.91
	309.69	0.10084	676.5	2.711	1.756
	310.29	0.10054	677	2.474	1.667
	310.88	0.10064	677.5	2.383	1.564
	311.48	0.09974	678	2.225	1.515
	312.07	0.09884	678.5	2.061	1.447
	312.66	0.09774	679	2.079	1.417
	313.26	0.09704	679.5	1.937	1.497
	313.85	0.09674	680	1.887	1.369
	314.45	0.09534	680.5	1.677	1.289
	315.04	0.09484	681	1.676	1.061
	315.64	0.09484	681.5	1.68	1.12
	316.23	0.09424	682	1.74	1.016
	316.83	0.09354	682.5	1.697	1.005
	317.42	0.09264	683	1.414	0.941
	318.01	0.09218	683.5	1.382	0.875
	318.61	0.09186	684	1.421	0.794
	319.2	0.09101	684.5	1.21	0.811
	319.8	0.09043	685	1.149	0.946
	320.39	0.08991	685.5	1.237	0.85
	320.99	0.08937	686	1.334	0.768
	321.58	0.08877	686.5	1.083	0.729
	322.17	0.08831	687	1.047	0.654
	322.77	0.08824	687.5	0.826	0.714
	323.36	0.08734	688	0.97	0.749
	323.96	0.08633	688.5	0.971	0.61
	324.55	0.08556	689	0.824	0.624
	325.14	0.08521	689.5	0.86	0.775
	325.74	0.08518	690	0.88	0.676
	326.33	0.08389	690.5	0.78	0.511
	326.92	0.08314	691	0.768	0.519
	327.52	0.0825	691.5	0.685	0.555
	328.11	0.08181	692	0.702	0.499
	328.71	0.08123	692.5	0.78	0.495
	329.3	0.08046	693	0.732	0.444
	329.89	0.08048	693.5	0.673	0.489
	330.49	0.07975	694	0.562	0.476
	331.08	0.07971	694.5	0.764	0.358
	331.67	0.07953	695	0.606	0.549
	332.27	0.0794	695.5	0.529	0.365
	332.86	0.07934	696	0.528	0.381
	333.45	0.07795	696.5	0.451	0.319
	334.05	0.07757	697	0.511	0.313
	334.64	0.0774	697.5	0.501	0.281
	335.23	0.07703	698	0.446	0.254
	335.83	0.0767	698.5	0.434	0.191
	336.42	0.07613	699	0.607	0.231
	337.01	0.07636	699.5	0.536	0.34
	337.61	0.07619	700	0.431	0.267
	338.2	0.07603	700.5	0.387	0.217
	338.79	0.07584	701	0.402	0.312
	339.39	0.07503	701.5	-0.043	0.194
	339.98	0.07461	702	0.266	0.201
	340.57	0.07357	702.5	0.395	0.18
	341.16	0.07305	703	0.384	-0.047
	341.76	0.07261	703.5	0.325	0.185
	342.35	0.07157	704	0.407	0.209
	342.94	0.07147	704.5	0.363	0.187
	343.54	0.07138	705	0.194	0.202
	344.13	0.07094	705.5	0.266	0.188
	344.72	0.07081	706	0.272	0.132
	345.31	0.07006	706.5	0.324	0.144
	345.91	0.06999	707	0.056	0.135
	346.5	0.06958	707.5	-0.065	-0.111
	347.09	0.06841	708	0.2	0.145
	347.68	0.06829	708.5	0.253	0.156
	348.28	0.06774	709	0.278	0.179
	348.87	0.06763	709.5	0.305	0.104
	349.46	0.06702	710	0.306	0.135
	350.05	0.06657	710.5	0.234	0.131
	350.65	0.06671	711	0.251	0.115
	351.24	0.0658	711.5	0.164	0.104
	351.83	0.06506	712	0.175	0.11
	352.42	0.06444	712.5	0.207	0.164
	353.02	0.06443	713	0.117	0.119
	353.61	0.06434	713.5	-0.034	-0.031
	354.2	0.06337
	354.79	0.06257
	355.39	0.06247
	355.98	0.06224
	356.57	0.06192
	357.16	0.06153
	357.75	0.06066
	358.35	0.06081
	358.94	0.06073
	359.53	0.06072
	360.12	0.06059
	360.71	0.05969
	361.3	0.06007
	361.9	0.06032
	362.49	0.06018
	363.08	0.06055
	363.67	0.06002
	364.26	0.05989
	364.85	0.06006
	365.45	0.05862
	366.04	0.05828
	366.63	0.05759
	367.22	0.0565
	367.81	0.05666
	368.4	0.05638
	368.99	0.05614
	369.59	0.05601
	370.18	0.05574
	370.77	0.05546
	371.36	0.05539
	371.95	0.05517
	372.54	0.05472
	373.13	0.05426
	373.72	0.05406
	374.31	0.05441
	374.91	0.05439
	375.5	0.05386
	376.09	0.05344
	376.68	0.05348
	377.27	0.05391
	377.86	0.05337
	378.45	0.05279
	379.04	0.05304
	379.63	0.0533
	380.22	0.05331
	380.81	0.05322
	381.4	0.05287
	381.99	0.05264
	382.58	0.05283
	383.18	0.05237
	383.77	0.05233
	384.36	0.05218
	384.95	0.05209
	385.54	0.05272
	386.13	0.05251
	386.72	0.05236
	387.31	0.05217
	387.9	0.05209
	388.49	0.0522
	389.08	0.05147
	389.67	0.05097
	390.26	0.05108
	390.85	0.05099
	391.44	0.05065
	392.03	0.05005
	392.62	0.04979
	393.21	0.04974
	393.8	0.0493
	394.39	0.04898
	394.98	0.04845
	395.57	0.04842
	396.16	0.04781
	396.75	0.04697
	397.34	0.0465
	397.93	0.04574
	398.51	0.04546
	399.1	0.04528
	399.69	0.04514
	400.28	0.04529
	400.87	0.04543
	401.46	0.04542
	402.05	0.04558
	402.64	0.04525
	403.23	0.04469
	403.82	0.04453
	404.41	0.04412
	405	0.04406
	405.59	0.04397
	406.18	0.04371
	406.76	0.04399
	407.35	0.04367
	407.94	0.04332
	408.53	0.04284
	409.12	0.04236
	409.71	0.04248
	410.3	0.04244
	410.89	0.04212
	411.48	0.042
	412.06	0.04201
	412.65	0.04171
	413.24	0.04136
	413.83	0.0408
	414.42	0.04044
	415.01	0.04027
	415.6	0.03991
	416.18	0.03982
	416.77	0.03994
	417.36	0.04004
	417.95	0.04028
	418.54	0.04031
	419.13	0.04025
	419.71	0.04003
	420.3	0.03986
	420.89	0.03999
	421.48	0.0399
	422.07	0.03974
	422.65	0.03908
	423.24	0.03874
	423.83	0.0388
	424.42	0.03842
	425.01	0.03815
	425.59	0.03751
	426.18	0.03729
	426.77	0.03768
	427.36	0.03762
	427.94	0.03765
	428.53	0.03777
	429.12	0.03796
	429.71	0.03819
	430.3	0.03788
	430.88	0.03754
	431.47	0.03705
	432.06	0.03655
	432.65	0.03574
	433.23	0.03456
	433.82	0.0339
	434.41	0.03287
	434.99	0.03239
	435.58	0.0323
	436.17	0.03164
	436.76	0.03166
	437.34	0.03136
	437.93	0.03099
	438.52	0.03105
	439.1	0.03018
	439.69	0.03013
	440.28	0.02992
	440.86	0.02982
	441.45	0.02985
	442.04	0.02904
	442.63	0.02939
	443.21	0.02904
	443.8	0.02868
	444.39	0.02857
	444.97	0.02837
	445.56	0.02844
	446.15	0.02849
	446.73	0.02848
	447.32	0.02803
	447.9	0.02818
	448.49	0.02821
	449.08	0.028
	449.66	0.02781
	450.25	0.02723
	450.84	0.02715
	451.42	0.02707
	452.01	0.02664
	452.59	0.02648
	453.18	0.02628
	453.77	0.02638
	454.35	0.0262
	454.94	0.026
	455.53	0.02606
	456.11	0.02558
	456.7	0.02487
	457.28	0.02501
	457.87	0.02526
	458.45	0.02502
	459.04	0.0246
	459.63	0.02434
	460.21	0.02445
	460.8	0.02418
	461.38	0.02407
	461.97	0.0237
	462.55	0.02377
	463.14	0.02395
	463.72	0.0229
	464.31	0.02317
	464.9	0.02272
	465.48	0.0216
	466.07	0.02143
	466.65	0.02113
	467.24	0.02164
	467.82	0.02148
	468.41	0.02104
	468.99	0.02089
	469.58	0.02069
	470.16	0.0208
	470.75	0.01997
	471.33	0.01958
	471.92	0.01957
	472.5	0.01899
	473.09	0.01867
	473.67	0.01806
	474.26	0.01756
	474.84	0.01712
	475.43	0.01651
	476.01	0.01615
	476.59	0.01618
	477.18	0.01596
	477.76	0.01532
	478.35	0.0148
	478.93	0.01417
	479.52	0.01339
	480.1	0.0122
	480.69	0.0117
	481.27	0.01152
	481.85	0.01109
	482.44	0.01075
	483.02	0.01034
	483.61	0.0106
	484.19	0.01079
	484.77	0.01023
	485.36	0.00946
	485.94	0.00943
	486.53	0.00942
	487.11	0.00887
	487.69	0.00826
	488.28	0.00771
	488.86	0.0077
	489.45	0.00784
	490.03	0.00716
	490.61	0.0068
	491.2	0.00729
	491.78	0.007
	492.36	0.0066
	492.95	0.00603
	493.53	0.00565
	494.11	0.00567
	494.7	0.00499
	495.28	0.0046
	495.86	0.00472
	496.45	0.00473
	497.03	0.00458
	497.61	0.00454
	498.2	0.00472
	498.78	0.00488
	499.36	0.0046
	499.95	0.00401
	500.53	0.0038
	501.11	0.00382
	501.7	0.00343
	502.28	0.00209
	502.86	0.00135
	503.44	0.00137
	504.03	0.00135
	504.61	0.00189
	505.19	0.00168
	505.77	0.00156
	506.36	0.00209
	506.94	0.00209
	507.52	0.00179
	508.11	0.000926021
	508.69	-0.000198979
	509.27	-0.000513979
	509.85	-0.000110979
	510.43	0.000206021
	511.02	0.000442021
	511.6	0.000349021
	512.18	0.000879021
	512.76	0.00181
	513.35	0.00134
	513.93	0.000732021
	514.51	0.000469021
	515.09	0.000273021
	515.67	0.000907021
	516.26	0.000955021
	516.84	0.000861021
	517.42	0.00128
	518	0.00143
	518.58	0.00163
	519.17	0.00168
	519.75	0.00144
	520.33	0.00121
	520.91	0.000873021
	521.49	0.000920021
	522.07	0.000565021
	522.66	0.000304021
	523.24	0.000892021
	523.82	0.000761021
	524.4	0.000759021
	524.98	0.000422021
	525.56	0.000562021
	526.14	0.0011
	526.72	0.00101
	527.31	0.000623021
	527.89	0.000179021
	528.47	0.000240021
	529.05	3.7021e-05
	529.63	-5.3979e-05
	530.21	-0.000466979
	530.79	-0.00115
	531.37	-0.00146
	531.95	-0.00121
	532.53	-0.000703979
	533.12	-0.000129979
	533.7	-6.5979e-05
	534.28	-0.000177979
	534.86	0.000482021
	535.44	0.000752021
	536.02	0.000435021
	536.6	0.000478021
	537.18	-2.97897e-06
	537.76	-0.000216979
	538.34	-0.000480979
	538.92	-0.00102
	539.5	-0.000536979
	540.08	-0.000745979
	540.66	-0.000916979
	541.24	-0.00116
	541.82	-0.00136
	542.4	-0.00106
	542.98	-0.00117
	543.56	-0.00165
	544.14	-0.00182
	544.72	-0.00162
	545.3	-0.00194
	545.88	-0.00195
	546.46	-0.00199
	547.04	-0.0023
	547.62	-0.00232
	548.2	-0.00284
	548.78	-0.00325
	549.36	-0.00299
	549.94	-0.00327
	550.52	-0.00351
	551.1	-0.00365
	551.68	-0.00375
	552.26	-0.0033
	552.84	-0.00292
	553.42	-0.00251
	554	-0.00162
	554.58	-0.000608979
	555.16	4.2021e-05
	555.74	0.000337021
	556.32	1.8021e-05
	556.89	-0.000392979
	557.47	-0.000742979
	558.05	-0.00145
	558.63	-0.002
	559.21	-0.00261
	559.79	-0.00285
	560.37	-0.0025
	560.95	-0.00205
	561.53	-0.00155
	562.11	-0.00149
	562.68	-0.00175
	563.26	-0.000971979
	563.84	-0.000363979
	564.42	-0.000771979
	565	-0.000808979
	565.58	-0.000337979
	566.16	0.000249021
	566.73	0.000267021
	567.31	0.000261021
	567.89	0.000234021
	568.47	0.000229021
	569.05	8.4021e-05
	569.63	-0.000694979
	570.2	-0.000966979
	570.78	-0.000873979
	571.36	-0.00126
	571.94	-0.00169
	572.52	-0.002
	573.09	-0.00187
	573.67	-0.00185
	574.25	-0.00176
	574.83	-0.00159
	575.41	-0.00187
	575.98	-0.00164
	576.56	-0.00186
	577.14	-0.00229
	577.72	-0.00245
	578.3	-0.00306
	578.87	-0.00368
	579.45	-0.0038
	580.03	-0.0038
	580.61	-0.0041
	581.18	-0.00405
	581.76	-0.00396
	582.34	-0.00382
	582.92	-0.0031
	583.49	-0.00248
	584.07	-0.00185
	584.65	-0.000994979
	585.22	-0.000243979
	585.8	0.000429021
	586.38	0.000799021
	586.96	0.000167021
	587.53	-0.000831979
	588.11	-0.00155
	588.69	-0.00232
	589.26	-0.00306
	589.84	-0.00378
	590.42	-0.00398
	590.99	-0.00358
	591.57	-0.00328
	592.15	-0.00345
	592.72	-0.00345
	593.3	-0.00332
	593.88	-0.00353
	594.45	-0.00364
	595.03	-0.00429
	595.61	-0.00425
	596.18	-0.0036
	596.76	-0.00396
	597.34	-0.00368
	597.91	-0.00345
	598.49	-0.00342
	599.06	-0.00307
	599.64	-0.00285
	600.22	-0.00222
	600.79	-0.00183
	601.37	-0.00184
	601.94	-0.00186
	602.52	-0.00155
	603.1	-0.00126
	603.67	-0.00136
	604.25	-0.00157
	604.82	-0.00198
	605.4	-0.00191
	605.97	-0.00172
	606.55	-0.00116
	607.13	-0.000515979
	607.7	-0.000567979
	608.28	-0.000392979
	608.85	-0.000217979
	609.43	-0.000242979
	610	-0.000637979
	610.58	-0.00156
	611.15	-0.00193
	611.73	-0.00215
	612.3	-0.00218
	612.88	-0.00224
	613.45	-0.0029
	614.03	-0.00329
	614.6	-0.00343
	615.18	-0.00381
	615.75	-0.00405
	616.33	-0.00338
	616.9	-0.00265
	617.48	-0.00199
	618.05	-0.00199
	618.63	-0.0024
	619.2	-0.0019
	619.78	-0.00226
	620.35	-0.00401
	620.93	-0.00554
	621.5	-0.00557
	622.08	-0.00505
	622.65	-0.00535
	623.23	-0.00539
	623.8	-0.00522
	624.37	-0.00462
	624.95	-0.00384
	625.52	-0.0038
	626.1	-0.00318
	626.67	-0.00285
	627.25	-0.00286
	627.82	-0.00274
	628.39	-0.0025
	628.97	-0.00184
	629.54	-0.00241
	630.12	-0.0023
	630.69	-0.0015
	631.26	-0.00134
	631.84	-0.00133
	632.41	-0.0016
	632.98	-0.00139
	633.56	-0.000888979
	634.13	-0.00157
	634.71	-0.00329
	635.28	-0.0036
	635.85	-0.00316
	636.43	-0.0033
	637	-0.0039
	637.57	-0.00419
	638.15	-0.00394
	638.72	-0.00287
	639.29	-0.00253
	639.87	-0.00333
	640.44	-0.00333
	641.01	-0.00361
	641.58	-0.00353
	642.16	-0.00323
	642.73	-0.00358
	643.3	-0.00399
	643.88	-0.0043
	644.45	-0.00462
	645.02	-0.00525
	645.59	-0.00573
	646.17	-0.0061
	646.74	-0.00559
	647.31	-0.00479
	647.89	-0.00393
	648.46	-0.00253
	649.03	-0.00159
	649.6	-0.00106
	650.18	-0.000753979
	650.75	-0.000946979
	651.32	-0.00127
	651.89	-0.00108
	652.46	-0.00109
	653.04	-0.000962979
	653.61	-0.00121
	654.18	-0.00174
	654.75	-0.00217
	655.33	-0.00184
	655.9	-0.00153
	656.47	-0.00247
	657.04	-0.00214
	657.61	-0.00147
	658.18	-0.000507979
	658.76	6.7021e-05
	659.33	-0.00108
	659.9	-0.0016
	660.47	-0.00197
	661.04	-0.00207
	661.61	-0.00325
	662.19	-0.00483
	662.76	-0.00446
	663.33	-0.00436
	663.9	-0.00409
	664.47	-0.00375
	665.04	-0.0047
	665.61	-0.00388
	666.19	-0.00285
	666.76	-0.00346
	667.33	-0.00366
	667.9	-0.00441
	668.47	-0.00456
	669.04	-0.00374
	669.61	-0.00353
	670.18	-0.00424
	670.75	-0.00438
	671.32	-0.00349
	671.9	-0.00283
	672.47	-0.00226
	673.04	-0.00304
	673.61	-0.00329
	674.18	-0.00232
	674.75	-0.00168
	675.32	-0.00169
	675.89	-0.00216
	676.46	-0.00119
	677.03	2.4021e-05
	677.6	0.00104
	678.17	0.00153
	678.74	0.00136
	679.31	0.00188
	679.88	0.00173
	680.45	0.00138
	681.02	0.000624021
	681.59	-0.000169979
	682.16	-7.4979e-05
	682.73	-0.000177979
	683.3	7.8021e-05
	683.87	6.02103e-06
	684.44	-0.000636979
	685.01	-0.000897979
	685.58	-0.00163
	686.15	-0.00225
	686.72	-0.00237
	687.29	-0.00263
	687.86	-0.00202
	688.43	-0.00171
	689	-0.00177
	689.57	-0.00158
	690.14	-0.00168
	690.71	-0.00181
	691.28	-0.0023
	691.84	-0.00288
	692.41	-0.00303
	692.98	-0.0033
	693.55	-0.00388
	694.12	-0.00472
	694.69	-0.00575
	695.26	-0.00624
	695.83	-0.00685
	696.4	-0.00751
	696.97	-0.00772
	697.53	-0.0074
	698.1	-0.00704
	698.67	-0.00695
	699.24	-0.00656
	699.81	-0.00651
	700.38	-0.00598
	700.95	-0.00509
	701.51	-0.00454
	702.08	-0.00379
	702.65	-0.00337
	703.22	-0.00345
	703.79	-0.00381
	704.36	-0.00427
	704.92	-0.00491
	705.49	-0.0056
	706.06	-0.00577
	706.63	-0.00515
	707.2	-0.00442
	707.77	-0.00356
	708.33	-0.00305
	708.9	-0.00243
	709.47	-0.00182
	710.04	-0.0024
	710.6	-0.00335
	711.17	-0.00438
	711.74	-0.00489
	712.31	-0.00542
	712.88	-0.00622
	713.44	-0.0061
	714.01	-0.00593
	714.58	-0.00522
	715.14	-0.00529
	715.71	-0.00598
	716.28	-0.00538
	716.85	-0.00485
	717.41	-0.00378
	717.98	-0.00345
	718.55	-0.00339
	719.12	-0.00197
	719.68	-0.000837979
	720.25	-0.000554979
	720.82	-0.00143
	721.38	-0.00232
	721.95	-0.00241
	722.52	-0.00247
	723.08	-0.00255
	723.65	-0.00263
	724.22	-0.00211
	724.78	-0.000937979
	725.35	0.000249021
	725.92	0.000592021
	726.48	0.000744021
	727.05	0.00122
	727.62	0.00112
	728.18	0.00157
	728.75	0.00154
	729.32	0.00117
	729.88	0.00153
	730.45	0.000871021
	731.01	0.000693021
	731.58	0.000616021
	732.15	-0.000459979
	732.71	-0.00122
	733.28	-0.00201
	733.84	-0.0027
	734.41	-0.00304
	734.98	-0.00388
	735.54	-0.00436
	736.11	-0.0043
	736.67	-0.0045
	737.24	-0.00379
	737.8	-0.00325
	738.37	-0.00203
	738.94	-0.00117
	739.5	-0.00149
	740.07	-0.00118
	740.63	-0.00195
	741.2	-0.0029
	741.76	-0.00334
	742.33	-0.00417
	742.89	-0.00417
	743.46	-0.00322
	744.02	-0.00259
	744.59	-0.0016
	745.15	-0.000989979
	745.72	-0.000867979
	746.28	-0.000231979
	746.85	-0.000128979
	747.41	-0.000375979
	747.98	-0.00133
	748.54	-0.00265
	749.11	-0.00304
	749.67	-0.00413
	750.24	-0.00551
	750.8	-0.00637
	751.37	-0.00746
	751.93	-0.00644
	752.49	-0.00502
	753.06	-0.0047
	753.62	-0.00289
	754.19	-0.00165
	754.75	-0.000812979
	755.32	0.000176021
	755.88	-1.2979e-05
	756.44	0.000225021
	757.01	0.000281021
	757.57	9.8021e-05
	758.14	-0.000233979
	758.7	-0.000552979
	759.26	-0.000985979
	759.83	-0.00168
	760.39	-0.00225
	760.95	-0.00378
	761.52	-0.0054
	762.08	-0.00628
	762.65	-0.00687
	763.21	-0.00809
	763.77	-0.00899
	764.34	-0.00755
	764.9	-0.0055
	765.46	-0.00413
	766.03	-0.00329
	766.59	-0.00278
	767.15	-0.00114
	767.72	-0.000888979
	768.28	-0.00186
	768.84	-0.00171
	769.41	-0.00145
	769.97	-2.7979e-05
	770.53	0.00192
	771.09	0.00334
	771.66	0.00435
	772.22	0.00463
	772.78	0.00436
	773.35	0.0038
	773.91	0.00314
	774.47	0.00141
	775.03	0.000183021
	775.6	-0.000428979
	776.16	-0.0013
	776.72	-0.00114
	777.28	-0.00191
	777.85	-0.00258
	778.41	-0.00341
	778.97	-0.0048
	779.53	-0.00541
	780.09	-0.00708
	780.66	-0.00875
	781.22	-0.01013
	781.78	-0.01083
	782.34	-0.00996
	782.9	-0.0086
	783.47	-0.00779
	784.03	-0.0062
	784.59	-0.00316
	785.15	-0.000777979
	785.71	0.00136
	786.27	0.00185
	786.84	0.00199
	787.4	0.00319
	787.96	0.00271
	788.52	0.00163
	789.08	0.000378021
	789.64	-0.00134
	790.2	-0.00308
	790.77	-0.0046
	791.33	-0.00522
	791.89	-0.00509
	792.45	-0.00455
	793.01	-0.00393
	793.57	-0.00399
	794.13	-0.00286
	794.69	-0.00203
	795.25	-0.00186
	795.82	-0.000867979
	796.38	-0.000862979
	796.94	9.7021e-05
	797.5	0.00129
	798.06	0.000850021
	798.62	0.000506021
	799.18	-0.000507979
	799.74	-0.00227
	800.3	-0.00408
	800.86	-0.00552
	801.42	-0.00588
	801.98	-0.00548
	802.54	-0.00466
	803.1	-0.00368
	803.66	-0.00243
	804.22	-0.00107
	804.78	2.1021e-05
	805.34	3.9021e-05
	805.9	0.000427021
	806.46	0.000284021
	807.02	-0.000257979
	807.58	5.7021e-05
	808.14	-0.000464979
	808.7	-0.000136979
	809.26	0.000610021
	809.82	0.000665021
	810.38	0.000142021
	810.94	-0.000600979
	811.5	-0.00109
	812.06	-0.0018
	812.62	-0.00132
	813.18	-0.000769979
	813.74	-2.2979e-05
	814.3	0.000815021
	814.86	0.000580021
	815.41	0.000978021
	815.97	0.000726021
	816.53	-0.00104
	817.09	-0.00371
	817.65	-0.00486
	818.21	-0.00494
	818.77	-0.0058
	819.33	-0.00589
	819.89	-0.00621
	820.45	-0.00557
	821	-0.00398
	821.56	-0.00457
	822.12	-0.00456
	822.68	-0.00402
	823.24	-0.00458
	823.8	-0.00446
	824.36	-0.00448
	824.91	-0.00292
	825.47	-0.000842979
	826.03	0.000320021
	826.59	0.00219
	827.15	0.00307
	827.7	0.00429
	828.26	0.00462
	828.82	0.00247
	829.38	0.0015
	829.94	-0.000207979
	830.49	-0.00275
	831.05	-0.0049
	831.61	-0.00744
	832.17	-0.00849
	832.73	-0.00901
	833.28	-0.00942
	833.84	-0.00887
	834.4	-0.00733
	834.96	-0.00567
	835.51	-0.00498
	836.07	-0.00449
	836.63	-0.00417
	837.19	-0.00375
	837.74	-0.00364
	838.3	-0.00377
	838.86	-0.00277
	839.41	-0.00228
	839.97	-0.00186
	840.53	-0.00131
	841.09	-0.000853979
	841.64	0.000475021
	842.2	0.000660021
	842.76	-0.000150979
	843.31	-0.000301979
	843.87	-0.000771979
	844.43	-0.00174
	844.98	-0.00321
	845.54	-0.00481
	846.1	-0.00578
	846.65	-0.00754
	847.21	-0.00962
	847.77	-0.00984
	848.32	-0.0098
	848.88	-0.00915
	849.43	-0.00828
	849.99	-0.0074
	850.55	-0.00436
	851.1	-0.00225
	851.66	-0.000678979
	852.21	0.00147
	852.77	0.00234
	853.33	0.00175
	853.88	0.000143021
	854.44	-0.00193
	854.99	-0.00351
	855.55	-0.00493
	856.11	-0.00623
	856.66	-0.00629
	857.22	-0.00555
	857.77	-0.0046
	858.33	-0.00296
	858.88	-0.00155
	859.44	-0.00124
	859.99	-0.000617979
	860.55	-0.00137
	861.1	-0.00196
	861.66	-0.000196979
	862.21	0.000441021
	862.77	0.000258021
	863.32	0.000585021
	863.88	0.000386021
	864.43	0.0014
	864.99	0.00183
	865.54	-0.000202979
	866.1	-0.000845979
	866.65	-0.000436979
	867.21	-0.000525979
	867.76	-0.00125
	868.32	-0.00144
	868.87	-0.000463979
	869.43	0.000904021
	869.98	0.000953021
	870.54	-0.00104
	871.09	-0.00169
	871.64	-0.0024
	872.2	-0.00302
	872.75	-0.00315
	873.31	-0.0035
	873.86	-0.00232
	874.41	-0.00214
	874.97	-0.00269
	875.52	-0.00337
	876.08	-0.00413
	876.63	-0.00498
	877.18	-0.00652
	877.74	-0.00698
	878.29	-0.00627
	878.85	-0.00391
	879.4	-0.00116
	879.95	-0.000373979
	880.51	0.000641021
	881.06	0.0026
	881.61	0.00381
	882.17	0.00288
	882.72	0.000802021
	883.27	-0.000323979
	883.83	-0.00165
	884.38	-0.00321
	884.93	-0.00583
	885.49	-0.00782
	886.04	-0.00809
	886.59	-0.00787
	887.14	-0.0078
	887.7	-0.0075
	888.25	-0.00584
	888.8	-0.00565
	889.35	-0.00437
	889.91	-0.00227
	890.46	-0.00202
	891.01	-0.00127
	891.57	-0.000472979
	892.12	0.000816021
	892.67	0.00282
	893.22	0.00303
	893.77	0.0017
	894.33	0.00188
	894.88	0.00222
	895.43	0.00124
	895.98	4.1021e-05
	896.54	-0.00169
	897.09	-0.00191
	897.64	-0.00233
	898.19	-0.00333
	898.74	-0.00196
	899.3	-0.00177
	899.85	-0.00164
	900.4	-0.00139
	900.95	-0.00123
	901.5	0.00144
	902.05	0.00163
	902.6	0.00122
	903.16	0.00133
	903.71	0.000663021
	904.26	0.000406021
	904.81	-0.00216
	905.36	-0.00358
	905.91	-0.00405
	906.46	-0.00518
	907.02	-0.00515
	907.57	-0.00505
	908.12	-0.00481
	908.67	-0.00519
	909.22	-0.00481
	909.77	-0.00432
	910.32	-0.00416
	910.87	-0.00285
	911.42	-0.00209
	911.97	-0.000698979
	912.52	-7.1979e-05
	913.07	-0.00126
	913.62	-0.00243
	914.17	-0.00395
	914.73	-0.00486
	915.28	-0.00612
	915.83	-0.00636
	916.38	-0.00545
	916.93	-0.00512
	917.48	-0.00368
	918.03	-0.00245
	918.58	-0.00217
	919.13	-0.00227
	919.68	-0.00105
	920.23	-0.000748979
	920.78	0.000159021
	921.33	0.000934021
	921.88	-0.000255979
	922.43	0.000350021
	922.97	0.000736021
	923.52	0.00192
	924.07	0.00238
	924.62	0.00203
	925.17	0.00343
	925.72	0.00397
	926.27	0.00411
	926.82	0.00512
	927.37	0.00524
	927.92	0.00627
	928.47	0.00667
	929.02	0.00547
	929.57	0.0058
	930.12	0.00634
	930.66	0.00639
	931.21	0.00482
	931.76	0.00386
	932.31	0.00301
	932.86	0.00151
	933.41	0.00159
	933.96	0.00111
	934.51	0.000351021
	935.05	0.000335021
	935.6	0.000350021
	936.15	0.00105
	936.7	0.00255
	937.25	0.00178
	937.8	0.0012
	938.34	0.00222
	938.89	0.00276
	939.44	0.00222
	939.99	0.000416021
	940.54	0.000256021
	941.08	-0.000185979
	941.63	-0.00144
	942.18	-0.00268
	942.73	-0.00421
	943.28	-0.00423
	943.82	-0.00471
	944.37	-0.00588
	944.92	-0.00513
	945.47	-0.00436
	946.01	-0.00492
	946.56	-0.00338
	947.11	-0.00236
	947.66	-0.00169
	948.2	-0.000734979
	948.75	-0.00147
	949.3	-0.000165979
	949.84	0.000958021
	950.39	0.000284021
	950.94	0.00127
	951.49	0.0024
	952.03	0.00368
	952.58	0.00413
	953.13	0.00211
	953.67	0.0015
	954.22	0.000130021
	954.77	-0.000828979
	955.31	-0.00208
	955.86	-0.00463
	956.41	-0.00503
	956.95	-0.00548
	957.5	-0.00549
	958.05	-0.00552
	958.59	-0.00603
	959.14	-0.00514
	959.68	-0.00364
	960.23	-0.00236
	960.78	-0.00156
	961.32	-0.000425979
	961.87	0.00181
	962.41	0.00216
	962.96	0.00294
	963.51	0.00539
	964.05	0.00712
	964.6	0.00763
	965.14	0.00641
	965.69	0.00437
	966.23	0.0042
	966.78	0.00341
	967.33	0.000436021
	967.87	-0.00233
	968.42	-0.00374
	968.96	-0.00216
	969.51	-0.000992979
	970.05	-0.000609979
	970.6	0.000382021
	971.14	0.000285021
	971.69	0.00103
	972.23	0.000929021
	972.78	-0.000236979
	973.32	0.000689021
	973.87	0.00113
	974.41	0.00128
	974.96	0.00342
	975.5	0.00625
	976.05	0.00746
	976.59	0.00847
	977.13	0.00783
	977.68	0.00728
	978.22	0.00764
	978.77	0.00582
	979.31	0.00558
	979.86	0.00599
	980.4	0.00541
	980.94	0.00597
	981.49	0.00513
	982.03	0.00382
	982.58	0.00452
	983.12	0.00368
	983.66	0.00434
	984.21	0.00422
	984.75	0.00437
	985.3	0.00521
	985.84	0.00431
	986.38	0.00415
	986.93	0.00335
	987.47	0.0041
	988.01	0.0051
	988.56	0.00499
	989.1	0.00503
	989.64	0.00454
	990.19	0.00219
	990.73	0.000876021
	991.27	-0.00126
	991.82	-0.00321
	992.36	-0.00415
	992.9	-0.00688
	993.45	-0.00714
	993.99	-0.0069
	994.53	-0.00794
	995.07	-0.00635
	995.62	-0.00604
	996.16	-0.00511
	996.7	-0.00216
	997.25	-0.000762979
	997.79	0.00165
	998.33	0.0029
	998.87	0.00244
	999.42	0.00136
	999.96	0.00187
	1000.5	0.000749021
	1001.04	-0.000952979
	1001.58	-0.00247
	1002.13	-0.00446
	1002.67	-0.00465
	1003.21	-0.00686
	1003.75	-0.00962
	1004.29	-0.01054
	1004.84	-0.00994
	1005.38	-0.00847
	1005.92	-0.00675
	1006.46	-0.0059
	1007	-0.00512
	1007.54	-0.00368
	1008.09	-0.00117
	1008.63	0.000670021
	1009.17	0.00165
	1009.71	-0.000676979
	1010.25	-0.000527979
	1010.79	0.00254
	1011.33	0.00262
	1011.87	0.00223
	1012.42	-0.00126
	1012.96	-0.00325
	1013.5	-0.00251
	1014.04	-0.00317
	1014.58	-0.00548
	1015.12	-0.00686
	1015.66	-0.00625
	1016.2	-0.00549
	1016.74	-0.00368
	1017.28	-0.0025
	1017.82	-0.00329
	1018.36	-0.00245
	1018.9	-0.00179
	1019.45	-0.00155
	1019.99	-0.00257
	1020.53	-0.00503
	1021.07	-0.00592
	1021.61	-0.00507
	1022.15	-0.00387
	1022.69	-0.00392
	1023.23	-0.00221
	1023.77	-0.000958979
	1024.31	0.00109
	1024.85	0.00216
	1025.39	0.00167
	1025.93	0.00302
	1026.47	0.00269
	1027.01	0.00188
	1027.54	0.00425
	1028.08	0.00514
	1028.62	0.00594
	1029.16	0.0085
	1029.7	0.00701
	1030.24	0.00506
	1030.78	0.00381
	1031.32	0.000664021
	1031.86	-0.00153
	1032.4	-0.00312
	1032.94	-0.0047
	1033.48	-0.00627
	1034.02	-0.00654
	1034.55	-0.00532
	1035.09	-0.0064
	1035.63	-0.00822
	1036.17	-0.00985
	1036.71	-0.00955
	1037.25	-0.00947
	1037.79	-0.00901
	1038.33	-0.00972
	1038.86	-0.00971
	1039.4	-0.00646
	1039.94	-0.00586
	1040.48	-0.00456
	1041.02	-0.00375
	1041.56	-0.00551
	1042.09	-0.00407
	1042.63	-0.00286
	1043.17	-0.00245
	1043.71	-0.00241
	1044.25	-0.00326
	1044.78	-0.000355979
	1045.32	0.000953021
	1045.86	-0.000111979
	1046.4	0.000404021
	1046.93	-0.000649979
	1047.47	0.000301021
	1048.01	0.00166
	1048.55	-0.000408979
	1049.08	0.00101
	1049.62	-0.000128979
	1050.16	-0.000871979
	1050.7	-0.00202
	1051.23	-0.00517
	1051.77	-0.00388
	1052.31	-0.00581
	1052.84	-0.0064
	1053.38	-0.00647
	1053.92	-0.00788
	1054.46	-0.00608
	1054.99	-0.00728
	1055.53	-0.00694
	1056.07	-0.00267
	1056.6	-0.000289979
	1057.14	0.00229
	1057.68	0.00404
	1058.21	0.00426
	1058.75	0.00378
	1059.28	0.00361
	1059.82	0.00234
	1060.36	0.0014
	1060.89	-0.000106979
	1061.43	0.00103
	1061.97	0.0024
	1062.5	0.00293
	1063.04	0.00531
	1063.57	0.00421
	1064.11	0.00546
	1064.65	0.00587
	1065.18	0.00589
	1065.72	0.00539
	1066.25	0.0059
	1066.79	0.00487
	1067.32	0.00201
	1067.86	0.00552
	1068.4	0.00543
	1068.93	0.00742
	1069.47	0.00879
	1070	0.0037
	1070.54	0.00617
	1071.07	0.00838
	1071.61	0.00811
	1072.14	0.00733
	1072.68	0.00434
	1073.21	0.00441
	1073.75	0.00535
	1074.28	0.00341
	1074.82	0.000789021
	1075.35	0.000245021
	1075.89	0.00148
	1076.42	0.00373
	1076.95	0.00706
	1077.49	0.01008
	1078.02	0.00855
	1078.56	0.00696
	1079.09	0.00449
	1079.63	0.00235
	1080.16	0.00352
	1080.7	-0.000138979
	1081.23	-0.0044
	1081.76	-0.00467
	1082.3	-0.00168
	1082.83	0.00228
	1083.37	0.0028
	1083.9	0.00271
	1084.43	0.0029
	1084.97	0.00541
	1085.5	0.00958
	1086.03	0.00852
	1086.57	0.00383
	1087.1	0.000994021
	1087.63	-0.00117
	1088.17	-0.00174
	1088.7	-0.00481
	1089.23	-0.01316
	1089.77	-0.01633
	1090.3	-0.0121
	1090.83	-0.01386
	1091.37	-0.01376
	1091.9	-0.0082
	1092.43	-0.00864
	1092.97	-0.00627
	1093.5	-0.00958
	1094.03	-0.01291
	1094.56	-0.00713
	1095.1	-0.01167
	1095.63	-0.01186
	1096.16	-0.00797
	1096.69	-0.00901
	1097.23	-0.00112
	1097.76	-0.000972979
	1098.29	-0.00453
	1098.82	-0.00467
	1099.36	0.00495
	1099.89	-0.02912
	1100.42	-0.00825
