# Supplementary material for: Interactions of semiconductor Cd-based quantum dots and Cd2+ with gut bacteria isolated from wild Salmo trutta fry
Source: PeerJ. 2022 Sep 15;10:e14025. doi: 10.7717/peerj.14025 (PMC9482770; doi:10.7717/peerj.14025)
Supplement: Supplemental Information 6 [file peerj-10-14025-s006.xlsx]

## Sheet: Fig. 4 raw data
		Isolates		MIC of Cd, mg/L (mM)						Isolates		MIC of Cd, mg/L (mM)
	Genus/species	No.	15ºC	Zone of inhibition, mm	25ºC	Zone of inhibition, mm			Genus/species	No.	15ºC	Zone of inhibition, mm	25ºC	Zone of inhibition, mm
	Carnobacterium maltaromaticum	ST6	60 (0.53)	9	50 (0.44)	9.75			A. sobria	AL10	70 (0.62)	7.6	70 (0.62)	7.8
				10		11						7.7		7.6
				10		10						7		7.3
				9.75		9.75						7		7.4
	C. maltaromaticum	ST17	30 (0.27)	7	30 (0.27)	7.6			A. sobria	ST3	60 (0.53)	7.4	60 (0.53)	8.6
				8		7.9						6.9		8.6
				8		7.4						7.1		8.3
				7.7		7.7						7.3		8.7
	Listeria sp.	ST19	20 (0.18)	8.7	10 (0.09)	8.4			A. sobria	ST4	60 (0.53)	8	60 (0.53)	7.8
				8.4		8.8						8		8
				8.8		8.6						9		8
				8.5		8.8						8.5		7
	Microbacterium sp.	ST5	350 (3.11)	8.4	370 (3.29)	7.6			A. sobria	ST7	70 (0.62)	7.3	70 (0.62)	7.8
				7.8		7.2						6.9		8.3
				8		7.5						7.4		8.1
				8.1		7.5						7.2		8.1
	Aeromonas sp.	AL8	80 (0.71)	8	80 (0.71)	6			A. sobria	ST12	70 (0.62)	7.3	70 (0.62)	7.1
				7		7						6.8		6.9
				8		7						7.3		7.4
				7.7		6.7						6.9		7.1
	Aeromonas sp.	ST11	50 (0.44)	6.8	50 (0.44)	8			A. sobria	ST18	60 (0.53)	8	70 (0.62)	7
				6.8		7						7		7
				7.5		8						8		6
				7.5		7						7.7		6.7
	Aeromonas sp.	ST15	50 (0.44)	7.1	50 (0.44)	6.9			Buttiauxella sp.	ST32	70 (0.62)	7.1	70 (0.62)	6.8
				6.9		6.8						7.1		6.7
				7		7.1						7		6.7
				6.8		7.1						7.3		6.5
	A. popoffii	AL2	60 (0.53)	7	60 (0.53)	7			Serratia sp.	ST33	50 (0.44)	7.7	60 (0.53)	8
				7.9		7.8						8		7
				8		7						7		7
				7.8		7.3						7.5		7.3
	A. salmonicida	AL13	70 (0.62)	6.8	70 (0.62)	7.5			Shewanella putrefaciens	AL18	80 (0.71)	6.7	80 (0.71)	7.3
				7		7						7		8
				7		7						6		7
				6		8						6.6		7.4
	A. salmonicida	AL20	80 (0.71)	6	80 (0.71)	6			S. putrefaciens	ST1	60 (0.53)	7.8	60 (0.53)	6.9
				6.2		7						7.9		7.1
				6.3		7						7.3		7.4
				6.2		6.7						7		6.6
	A. salmonicida	ST8	70 (0.62)	8	80 (0.71)	8			S. putrefaciens	ST10	60 (0.53)	6.9	60 (0.53)	7.7
				8		8						6.7		7.8
				7		7						7		7.3
				7.8		7.7						6.7		7.5
	A. salmonicida	ST9	70 (0.62)	8	70 (0.62)	7.8			S. putrefaciens	ST13	60 (0.53)	8.2	60 (0.53)	7.6
				8.1		7.7						7.9		7.3
				7.9		7.5						7.7		7.2
				7.9		7.6						7.9		7.3
	A. salmonicida	ST16	60 (0.53)	8	60 (0.53)	7.1			S. putrefaciens	ST14	60 (0.53)	7.1	70 (0.62)	7.8
				8.1		7.7						6.9		7.2
				7.7		7.6						7.5		7.5
				7.8		7.5						7.4		7.8

## Sheet: Fig. 5 raw data
Listeria sp. ST19
Temperature, °C	15					25
Cd concentration mg/L (mM)	20 (0.18)	30 (0.27)	40 (0.36)	50 (0.44)	60 (0.53)	10 (0.09)	20 (0.18)	30 (0.27)	40 (0.36)	50 (0.44)	60 (0.53)
Inhibotion zone diameter, mm	8.7	10	10	11.7	11.8	8.4	11.7	13	14	14.1	14.3
	8.4	10.1	10	12	13	8.8	11	14	14	15	15
	8.8	9.7	10.4	11.1	12	8.6	11.4	14	14.1	14	15
	8.5	9.7	11	11.4	11	8.8	12	13.3	13.7	14.3	14
C. maltaromaticum ST17
Temperature, °C	15					25
Cd concentration mg/L (mM)	30 (0.27)	40 (0.36)	50 (0.44)	60 (0.53)	70 (0.62)	30 (0.27)	40 (0.36)	50 (0.44)	60 (0.53)	70 (0.62)
Inhibotion zone diameter, mm	7	10.6	12	15	14.8	7.6	11	13.7	12	14.4
	8	10	11	12	15	7.9	11.4	11.7	14	14
	8	10	12	13.3	14	7.4	10	10	13	15
	7.7	10.5	13	14	15	7.7	10.6	11	14.7	15
Microbacterium sp. ST5
Temperature, °C	15					25
Cd concentration mg/L (mM)	350 (3.11)	360 (3.20)	370 (3.29)	380 (3.38)	400 (3.56)	370 (3.29)	380 (3.38)	400 (3.56)
Inhibotion zone diameter, mm	8.4	8.5	8.7	8.8	9	7.6	8.6	8.4
	7.8	8.6	8.6	9.5	9.6	7.2	7.8	8.9
	8	8.5	8.7	8.6	8.6	7.5	8.1	9.4
	8.1	8.1	8.5	8.9	9.1	7.5	8.2	8.9
Serratia sp. ST33
Temperature, °C	15				25
Cd concentration mg/L (mM)	50 (0.44)	60 (0.53)	70 (0.62)	80 (0.71)	60 (0.53)	70 (0.62)	80 (0.71)
Inhibotion zone diameter, mm	7.7	7.9	8.5	8.6	8	7.9	8.6
	8	8	8.6	8.7	7	8.2	8.8
	7	8.1	8.2	8.7	7	8.4	9.2
	7.5	7.5	8	9	7.3	8.5	9.3
Aeromonas sp. ST11
Temperature, °C	15				25
Cd concentration mg/L (mM)	50 (0.44)	60 (0.53)	70 (0.62)	80 (0.71)	50 (0.44)	60 (0.53)	70 (0.62)	80 (0.71)
Inhibotion zone diameter, mm	6.8	7.5	8.3	9	8	8.7	9	9.7
	6.8	7.4	8.1	8.9	7	8.6	8.9	9.6
	7.5	7.8	8.6	8.6	8	8.6	8.9	9.5
	7.5	7.6	8.6	8.9	7	8.3	8.8	9.7
S. putrefaciens ST10
Temperature, °C	15			25
Cd concentration mg/L (mM)	60 (0.53)	70 (0.62)	80 (0.71)	60 (0.53)	70 (0.62)	80 (0.71)
Inhibotion zone diameter, mm	6.9	8.6	8.2	7.7	7.5	8
	6.7	8.1	8.7	7.8	7.6	8.7
	7	7.6	8.2	7.3	8.3	8.7
	6.7	8.5	8.1	7.5	7.4	8.3

## Sheet: Table 1 raw data
Supplementary Table S3: Bacterial colony count after 9 h exposure to Cd-based (CdTe/ZnS-COOH) QDs at 25 ºC, pH 5.0 in light. Raw data.
Genus/species	Control CFU/mL	CdSe/ZnS-COOH, 4 nM CFU/mL
Listeria sp. ST19	1.9 x 108	1.7 x 108
	2.0 x 108	1.9 x 108
	1.8 x 108	1.6 x 108
C. maltaromaticum ST17	1.8 x 108	1.5 x 108
	1.8 x 108	1.3 x 108
	1.6 x 108	1.6 x 108
Microbacterium sp. ST5	1.6 x 108	1.5 x 108
	1.5 x 108	1.4 x 108
	1.6 x 108	1.6 x 108
Serratia sp. ST33	1.5 x 108	1.4 x 108
	1.3 x 108	1.3 x 108
	1.9 x 108	1.6 x 108
Aeromonas sp. ST11	1.4 x 108	1.6 x 108
	1.5 x 108	1.4 x 108
	1.6 x 108	1.5 x 108
S. putrefaciens ST10	1.3 x 108	1.9 x 108
	2.0 x 108	2.0 x 108
	1.8 x 108	1.2 x 108
